# Supplementary material for: Bioinformatic Analysis of Secondary Metabolite Biosynthetic Potential in Pathogenic Fusarium
Source: MDPI journal article supplement (doi:10.3390/jof9080850), 2023-08-15
Supplement: s1 [file s1]

# Bioinformatic Analysis of Secondary Metabolite Biosynthetic Potential in Pathogenic *Fusarium*

Chao Lin <sup>1</sup>, Xi-long Feng <sup>1</sup>, Yu Liu <sup>1</sup>, Zhao-chen Li <sup>1</sup>, Xiu-Zhang Li <sup>2</sup> and Jianzhao Qi <sup>1,\*</sup>

<sup>1</sup> Shaanxi Key Laboratory of Natural Products & Chemical Biology, College of Chemistry & Pharmacy, North-west A&F University, Yangling, Xianyang 712100, China

<sup>2</sup> State Key Laboratory of Plateau Ecology and Agriculture, Qinghai Academy of Animal and Veterinary Sciences, Qinghai University, Xining 810016, China

\* Correspondence: qjz@nwafu.edu.cn

|                                                                                                                                                                                                                                                     |           |
|-----------------------------------------------------------------------------------------------------------------------------------------------------------------------------------------------------------------------------------------------------|-----------|
| <b>Supplementary Table.</b>                                                                                                                                                                                                                         | <b>3</b>  |
| Table S1: The 35 pathogenic <i>Fusarium</i> species used in this study.                                                                                                                                                                             | 3         |
| Table S2: BGC statistics based on antiSMASH predictions.                                                                                                                                                                                            | 4         |
| Table S3: The 16 identified BGCs for GCF network establishment.                                                                                                                                                                                     | 5         |
| Table S4: Sequence identities (%) of Ffsc4 and its homologues.                                                                                                                                                                                      | 6         |
| Table S5: Sequence identities (%) of Ffsc6 and its homologues.                                                                                                                                                                                      | 7         |
| Table S6: Sequence identities (%) of STC5 and homologues.                                                                                                                                                                                           | 8         |
| Table S7: Sequence identities (%) of STC3 and homologues.                                                                                                                                                                                           | 9         |
| Table S8: Sequence identities (%) of CLM1 and homologues.                                                                                                                                                                                           | 10        |
| Table S9: Sequence identities (%) of TRI5 and homologues.                                                                                                                                                                                           | 11        |
| Table S10: Sequence identities (%) of FlvE and homologues.                                                                                                                                                                                          | 12        |
| Table S11: Sequence identities (%) of DpfgD and homologues.                                                                                                                                                                                         | 13        |
| Table S12: Sequence identities (%) of GGS and homologues.                                                                                                                                                                                           | 14        |
| Table S13: Sequence identities (%) of CPS/KS and homologues.                                                                                                                                                                                        | 16        |
| Table S14: Sequence identities (%) of DpfgB and homologues.                                                                                                                                                                                         | 17        |
| Table S15: Sequence identities (%) of FgMS, FoFs and homologues.                                                                                                                                                                                    | 18        |
| Table S16: Sequence identities (%) of ERG7 and homologues.                                                                                                                                                                                          | 19        |
| Table S17: Sequence identities (%) of CarRA and homologues.                                                                                                                                                                                         | 20        |
| Table S18: Sequence identities (%) of DMATS1 and homologues.                                                                                                                                                                                        | 21        |
| Table S19: Sequence identities (%) of BEA1 and homologues.                                                                                                                                                                                          | 22        |
| <b>Supplementary Figures.</b>                                                                                                                                                                                                                       | <b>23</b> |
| Figure S1: GCF network of 1733 predicted biosynthetic gene cluster (BGC) from 35 pathogenic <i>Fusarium</i> species caculated by BiG-SCAPE pipeline and visualised with Cytoscape.                                                                  | 23        |
| Figure S2: Cluster analysis of terpenoid synthase and their homologues based on phylogenetic tree.                                                                                                                                                  | 24        |
| Figure S3: Comparison of <i>Flv</i> BGCs from different species.                                                                                                                                                                                    | 25        |
| Figure S4: Phylogenetic tree-based cluster analysis of GGPP-related enzymes.                                                                                                                                                                        | 26        |
| Figure S5: Comparison of <i>dpfg</i> BGCs from different pathogenic <i>Fusarium</i> species.                                                                                                                                                        | 27        |
| Figure S6: The predicted three-dimensional structure of protein of FgMS (A), FGSG_01738 (B), FGRMN_7913 (C), FPCIR_12113 (D), FPANT_13888 (E) and FoFs(F) predicted by Alphafold.                                                                   | 28        |
| Figure S7: Phylogenetic tree-based cluster analysis of CarRA and its homologues.                                                                                                                                                                    | 29        |
| Figure S8: Domain comparison of NPS1 and its homologues(A), comparison of the BGCs containing <i>nps1</i> from different species(B).                                                                                                                | 30        |
| Figure S9: Domain comparison of NPS2 and its homologues.                                                                                                                                                                                            | 31        |
| Figure S10: Domain comparison of NPS6 and its homologues.                                                                                                                                                                                           | 32        |
| Figure S11: Domain comparison of SidE and its homologues.                                                                                                                                                                                           | 33        |
| Figure S12: Domain comparison of SidC and its homologues.                                                                                                                                                                                           | 34        |
| Figure S13: Domain comparison of ESYN1 and its homologues.                                                                                                                                                                                          | 35        |
| Figure S14: Domain comparison of PesF and its homologues.                                                                                                                                                                                           | 36        |
| Figure S15: Domain comparison of HTS1 and its homologues.                                                                                                                                                                                           | 37        |
| Figure S16: Comparison of <i>Bea</i> BGCs from different pathogenic fungi.                                                                                                                                                                          | 38        |
| Figure S17: Comparative analysis of AclP and its homologues. Comparison of the amino acid sequence identity of AclP and its homologues(A), comparison of the structural domains of AclP and its homologues(B), structure of cyclo-(L-Phe-L-Phe)(C). | 39        |
| Figure S18: Comparison of <i>Acl</i> BGCs from different species.                                                                                                                                                                                   | 40        |
| Figure S19: Comparison of the BGCs containing <i>nrps4</i> from different <i>Fusarium</i> species.                                                                                                                                                  | 41        |
| Figure S20: Comparison of the BGCs containing <i>nrps5</i> from different <i>Fusarium</i> species.                                                                                                                                                  | 42        |
| Figure S21: Comparison of the BGCs containing <i>nrps7</i> and PKS6 from different <i>Fusarium</i> species.                                                                                                                                         | 43        |
| Figure S22: Structures of sansalvamide (A), comparison of the amino acid sequence identity of NRPS30 and its homologues (B), domain comparison of NRPS30 and its homologues (C), comparison of the BGC for aurofusarin and its similar BGCs (D).    | 44        |

|                                                                                                                                                                                                                                                                         |           |
|-------------------------------------------------------------------------------------------------------------------------------------------------------------------------------------------------------------------------------------------------------------------------|-----------|
| Figure S23: Comparison of the amino acid sequence identity of Chry1 and its homologues (A), domain comparison of Chry1 and its homologues (B), comparison of <i>chry</i> BGCs from different <i>Fusarium</i> species.                                                   | 45        |
| Figure S24: Comparison of the amino acid sequence identity of GRA1 and its homologues (A), domain comparison of GRA1 and its homologues (B), comparison of the BGC for Gramillin A, Gramillin B and its similar BGCs (C), structure of Gramillin A and Gramillin B (D). | 46        |
| Figure S25: Domain comparison of <i>apf1</i> and its homologues (A), comparison of <i>apf</i> BGCs from different <i>Fusarium</i> species (B).                                                                                                                          | 47        |
| Figure S26: Domain comparison of <i>FrbI</i> and its homologues (A), domain comparison of PKS-NRPS1 and its homologues (B), domain comparison of <i>FUS1</i> and its homologues (C).                                                                                    | 48        |
| Figure S27: Phylogenetic tree-based cluster analysis of PKS-related enzymes.                                                                                                                                                                                            | 49        |
| Figure S28: Comparison of <i>gpy</i> BGCs from different <i>Fusarium</i> species.                                                                                                                                                                                       | 50        |
| Figure S29: Comparison of <i>fsr</i> BGCs from different <i>Fusarium</i> species.                                                                                                                                                                                       | 51        |
| Figure S30: Comparison of <i>FUBB</i> GCGs from different <i>Fusarium</i> species.                                                                                                                                                                                      | 52        |
| Figure S31: Comparison of <i>bik</i> BGCs from different <i>Fusarium</i> species.                                                                                                                                                                                       | 53        |
| Figure S32: Comparison of <i>FPY</i> BGCs from different <i>Fusarium</i> species.                                                                                                                                                                                       | 54        |
| Figure S33: Comparison of <i>fog</i> BGCs from different <i>Fusarium</i> species.                                                                                                                                                                                       | 55        |
| Figure S34: Comparison of the amino acid sequence identity of <i>SdnO</i> and its homologues (A), domain comparison of <i>SdnO</i> and its homologues (B).                                                                                                              | 56        |
| Figure S35: Comparison of <i>DEPB</i> GCGs from different <i>Fusarium</i> species.                                                                                                                                                                                      | 57        |
| Figure S37: Domain comparison of <i>PKS40</i> and its homologues.                                                                                                                                                                                                       | 59        |
| Figure S39: Comparison of the amino acid sequence identity of <i>Alt5</i> and its homologues (A), domain comparison of <i>Alt5</i> and its homologues (B).                                                                                                              | 61        |
| Figure S40: Domain comparison of <i>DpfgA</i> and its homologues.                                                                                                                                                                                                       | 62        |
| Figure S41: Domain comparison of <i>FSL1</i> and its homologues (A), comparison of <i>FSLB</i> GCGs from different <i>Fusarium</i> species (B).                                                                                                                         | 63        |
| Figure S42: Domain comparison of <i>Bet1</i> and its homologues (A), comparison of <i>bet</i> BGCs from different species (B).                                                                                                                                          | 64        |
| Figure S43: Domain comparison of <i>G433</i> and its homologues (A), comparison of the BGC for <i>G433</i> and its similar BGCs (B).                                                                                                                                    | 65        |
| Figure S44: Comparison of the amino acid sequence identity of <i>Alt5</i> and its homologues (A), domain comparison of <i>FUM1</i> and its homologues (B), comparison of <i>FUMB</i> GCGs from different <i>Fusarium</i> species (C).                                   | 66        |
| Figure S45: Domain comparison of <i>ZEA1</i> and its homologues (A), domain comparison of <i>ZEA2</i> and its homologues (B).                                                                                                                                           | 67        |
| Figure S46: Domain comparison of <i>PkhA</i> and its homologues (A), domain comparison of <i>PkhB</i> and its homologues (B).                                                                                                                                           | 68        |
| Figure S47: Comparison of <i>luc</i> BGCs from different <i>Fusarium</i> species.                                                                                                                                                                                       | 69        |
| Figure S48: Amino acid sequence identity comparison (A) and domain comparison (B) of newly discovered PKS-NRPSs in 35 pathogenic <i>Fusarium</i> species.                                                                                                               | 70        |
| Figure S49: Comparison of <i>smB</i> BGCs from different <i>Fusarium</i> species.                                                                                                                                                                                       | 71        |
| Figure S50: Comparison of <i>fsa</i> BGCs and <i>PKS-NRPSB</i> GCGs from different <i>Fusarium</i> species.                                                                                                                                                             | 72        |
| Figure S51: Comparison of <i>icc</i> BGCs from different <i>Fusarium</i> species.                                                                                                                                                                                       | 73        |
| Figure S52: Comparison of the amino acid sequence identity of <i>FsdS</i> and its homologues (A), domain comparison of <i>FsdS</i> and its homologues (B), comparison of <i>fsdB</i> GCGs from different <i>Fusarium</i> species (C).                                   | 74        |
| Figure S53: Domain comparison of <i>ACE1</i> and its homologues (A), comparison of <i>ACEB</i> GCGs from different species (B).                                                                                                                                         | 75        |
| Figure S54: Domain comparison of <i>ThnA</i> and its homologues (A), comparison of <i>thn</i> BGCs from different species (B).                                                                                                                                          | 76        |
| Figure S55: Domain comparison of <i>CghG</i> and its homologues.                                                                                                                                                                                                        | 77        |
| Figure S56: Domain comparison of <i>LCI18_013989</i> and <i>jgi.p_Fustri_620762</i> .                                                                                                                                                                                   | 78        |
| Figure S57: Cluster analysis of NRPS-like sequences based on phylogenetic tree.                                                                                                                                                                                         | 79        |
| <b>References.</b>                                                                                                                                                                                                                                                      | <b>80</b> |

## Supplementary Table.

Table S1: The 35 pathogenic *Fusarium* species used in this study.

| Species                           | Pathogenicity                                                                                                                                                              | Accession No.   | Reference |
|-----------------------------------|----------------------------------------------------------------------------------------------------------------------------------------------------------------------------|-----------------|-----------|
| <i>Fusarium oxysporum</i>         | Wilt diseases                                                                                                                                                              | GCF_000271745.1 | [1]       |
| <i>Fusarium fujikuroi</i>         | Bakanae disease                                                                                                                                                            | GCF_900079805.1 | [2]       |
| <i>Fusarium solani-melongenae</i> | <i>Fusarium</i> Root and Stem Rot in <i>Sweet potatoes</i>                                                                                                                 | GCA_023101225.1 | [3]       |
| <i>Fusarium vanettenii</i>        | rot disease                                                                                                                                                                | GCF_000151355.1 | [4]       |
| <i>Fusarium odoratissimum</i>     | <i>Fusarium</i> wilt of banana                                                                                                                                             | GCF_000260195.1 | [5]       |
| <i>Fusarium proliferatum</i>      | Vascular Wilt on Cowpea ( <i>Vigna unguiculata</i> ) in Brazil                                                                                                             | GCF_900067095.1 | [6]       |
| <i>Fusarium graminearum</i>       | <i>Fusarium</i> head blight in small-grain cereals                                                                                                                         | GCF_000240135.3 | [7]       |
| <i>Fusarium pseudograminearum</i> | wheat crown rot disease                                                                                                                                                    | GCF_000303195.2 | [8]       |
| <i>Fusarium mangiferae</i>        | mango malformation disease (MMD)                                                                                                                                           | GCF_900044065.1 | [9]       |
| <i>Fusarium culmorum</i>          | root rot and head blight in wheat.                                                                                                                                         | GCA_016952355.1 | [10]      |
| <i>Fusarium solani</i>            | Root Rot and Stem Canker on Storage Roots of Sweet Potato                                                                                                                  | GCF_020744495.1 | [11]      |
| <i>Fusarium redolens</i>          | American Ginseng Root Rot                                                                                                                                                  | GCF_020744475.1 | [12]      |
| <i>Fusarium flagelliforme</i>     | Maize Leaf Blight                                                                                                                                                          | GCF_020744385.1 | [13]      |
| <i>Fusarium musae</i>             | post-harvest disease in bananas and systemic and superficial infection in humans.                                                                                          | GCF_019915245.1 | [14]      |
| <i>Fusarium falciforme</i>        | Leaf Blight in <i>Acacia mangium</i>                                                                                                                                       | GCF_026873545.1 | [15]      |
| <i>Fusarium venenatum</i>         | foot and root rot of wheat ( <i>Triticum aestivum</i> )                                                                                                                    | GCF_900007375.1 | [16]      |
| <i>Fusarium tricinctum</i>        | <i>Fusarium</i> head blight (FHB) and root rot                                                                                                                             | GCA_020744515.1 | [17]      |
| <i>Fusarium poae</i>              | <i>Fusarium</i> Head Blight of Wheat                                                                                                                                       | GCF_019609905.1 | [18]      |
| <i>Fusarium keratoplasticum</i>   | associated with human infection                                                                                                                                            | GCF_025433545.1 | [19]      |
| <i>Fusarium graminum</i>          | <i>Fusarium</i> head blight (FHB) of small grain cereals                                                                                                                   | GCA_013266165.1 | [20]      |
| <i>Fusarium napiforme</i>         | disseminated fusariosis                                                                                                                                                    | GCA_013396005.1 | [21]      |
| <i>Fusarium mexicanum</i>         | agent of mango and big-leaf mahogany malformation in Mexico                                                                                                                | GCA_013396015.1 | [22]      |
| <i>Fusarium decemcellulare</i>    | Inflorescence Wilt and Vascular and Flower Necrosis of Rambutan ( <i>Nephelium lappaceum</i> ), Longan ( <i>Dimocarpus longan</i> ), and Mango ( <i>Mangifera indica</i> ) | GCA_013266205.1 | [23]      |
| <i>Fusarium acutatum</i>          | permanent wilting of chickpea cuttings and killed cells                                                                                                                    | GCA_012932015.1 | [24]      |
| <i>Fusarium subglutinans</i>      | Maize pathogen                                                                                                                                                             | GCF_013396075.1 | [25]      |
| <i>Fusarium verticillioides</i>   | kernel and ear rot of maize                                                                                                                                                | GCF_000149555.1 | [26]      |
| <i>Fusarium avenaceum</i>         | Wheat pathogen                                                                                                                                                             |                 | [27]      |
| <i>Fusarium globosum</i>          | Chlorosis and necrosis of wheat leaves and maize stems                                                                                                                     | GCA_013396165.1 | [28]      |
| <i>Fusarium mundagurra</i>        | producer of fumonisins                                                                                                                                                     | GCA_013396205.1 | [29]      |
| <i>Fusarium pseudocircinatum</i>  | Mango Malformation Disease                                                                                                                                                 | GCA_013396035.1 | [30]      |
| <i>Fusarium denticulatum</i>      | chlorotic leaf distortion with deformation of young leaves and stunted vines.                                                                                              | GCA_013396175.1 | [31]      |
| <i>Fusarium pseudoanthophilum</i> | were capable of infecting vegetables such as tomatoes, bell and cayenne peppers,                                                                                           | GCA_013395995.1 | [32]      |
| <i>Fusarium anthophilum</i>       | produced at least one of the analyzed mycotoxins                                                                                                                           | GCA_013364935.1 | [33]      |
| <i>Fusarium sarcochroum</i>       | dry root rot, crown, trunk or twig canker or twig dieback of citrus trees                                                                                                  | GCA_013266185.1 | [34]      |
| <i>Fusarium moniliforme</i>       | ear rot and stalk rot of corn and infection of corn kernels                                                                                                                |                 | [35]      |



Table S2: BGC statistics based on antiSMASH predictions.

| Species                            | BGC Type |     |      |         |        |        |       | Total |
|------------------------------------|----------|-----|------|---------|--------|--------|-------|-------|
|                                    | NRPS     | PKS | RiPP | Terpene | Hybird | Indole | Other |       |
| <i>Fusarium oxysporum</i>          | 19       | 8   | 2    | 9       | 6      | 2      | 1     | 47    |
| <i>Fusarium fujikuroi</i>          | 16       | 8   | 4    | 12      | 9      | 1      | 2     | 52    |
| <i>Fusarium solani-melonigenae</i> | 15       | 11  | 1    | 6       | 4      | 1      | 1     | 39    |
| <i>Fusarium vanettenii</i>         | 14       | 12  | 1    | 6       | 3      | 1      | 1     | 38    |
| <i>Fusarium odoratissimum</i>      | 15       | 8   | 2    | 11      | 6      | 2      | 1     | 45    |
| <i>Fusarium proliferatum</i>       | 22       | 11  | 4    | 13      | 8      | 2      | 1     | 61    |
| <i>Fusarium graminearum</i>        | 15       | 7   | 4    | 11      | 10     | 0      | 1     | 48    |
| <i>Fusarium pseudograminearum</i>  | 14       | 5   | 2    | 10      | 9      | 0      | 0     | 40    |
| <i>Fusarium mangiferae</i>         | 17       | 7   | 3    | 13      | 9      | 3      | 1     | 53    |
| <i>Fusarium culmorum</i>           | 14       | 7   | 2    | 12      | 5      | 0      | 1     | 41    |
| <i>Fusarium solani</i>             | 14       | 11  | 1    | 5       | 7      | 1      | 1     | 40    |
| <i>Fusarium redolens</i>           | 18       | 9   | 4    | 11      | 7      | 2      | 0     | 51    |
| <i>Fusarium flagelliforme</i>      | 18       | 7   | 2    | 9       | 6      | 1      | 1     | 44    |
| <i>Fusarium musae</i>              | 18       | 7   | 2    | 11      | 5      | 2      | 1     | 46    |
| <i>Fusarium falciforme</i>         | 13       | 13  | 1    | 5       | 5      | 1      | 1     | 39    |
| <i>Fusarium venenatum</i>          | 14       | 5   | 5    | 12      | 8      | 0      | 0     | 44    |
| <i>Fusarium tricinctum</i>         | 20       | 9   | 6    | 11      | 10     | 3      | 1     | 60    |
| <i>Fusarium poae</i>               | 15       | 9   | 4    | 14      | 5      | 0      | 1     | 48    |
| <i>Fusarium keratoplasticum</i>    | 11       | 11  | 1    | 6       | 7      | 1      | 1     | 38    |
| <i>Fusarium graminum</i>           | 16       | 12  | 6    | 9       | 5      | 2      | 1     | 51    |
| <i>Fusarium napiforme</i>          | 17       | 13  | 4    | 10      | 7      | 3      | 1     | 55    |
| <i>Fusarium mexicanum</i>          | 18       | 14  | 2    | 11      | 11     | 3      | 1     | 60    |
| <i>Fusarium decemcellulare</i>     | 22       | 17  | 3    | 12      | 6      | 3      | 1     | 64    |
| <i>Fusarium acutatum</i>           | 18       | 11  | 3    | 11      | 8      | 2      | 1     | 54    |
| <i>Fusarium subglutinans</i>       | 19       | 13  | 3    | 11      | 6      | 3      | 1     | 56    |
| <i>Fusarium verticillioides</i>    | 17       | 12  | 1    | 6       | 7      | 2      | 1     | 46    |
| <i>Fusarium avenaceum</i>          | 19       | 12  | 5    | 12      | 9      | 2      | 2     | 61    |
| <i>Fusarium globosum</i>           | 22       | 14  | 3    | 13      | 7      | 2      | 1     | 62    |
| <i>Fusarium mundagurra</i>         | 21       | 15  | 3    | 10      | 5      | 2      | 1     | 57    |
| <i>Fusarium pseudocircinatum</i>   | 16       | 14  | 5    | 11      | 8      | 1      | 1     | 56    |
| <i>Fusarium denticulatum</i>       | 15       | 15  | 2    | 13      | 11     | 1      | 1     | 58    |
| <i>Fusarium pseudoanthophilum</i>  | 19       | 13  | 5    | 12      | 6      | 2      | 1     | 58    |
| <i>Fusarium anthophilum</i>        | 23       | 15  | 5    | 13      | 7      | 1      | 1     | 65    |
| <i>Fusarium sarcochroum</i>        | 16       | 11  | 10   | 9       | 7      | 2      | 0     | 55    |
| <i>Fusarium moniliforme</i>        | 17       | 12  | 1    | 6       | 7      | 2      | 1     | 46    |

Table S3: The 16 identified BGCs for GCF network establishment.

| Type                    | GCF                    | Identified BGC        | Representative Compound                           | Reference |
|-------------------------|------------------------|-----------------------|---------------------------------------------------|-----------|
| PKS I                   | <i>fsr</i> _GCF        | <i>fsr</i> BGC        | oxyjavanicin                                      | [36]      |
|                         | <i>BIK</i> _GCF        | <i>BIK</i> BGC        | bikaverin                                         | [37]      |
|                         | <i>ACTT</i> /PKS19_GCF | <i>ACTT</i> /PKS19BGC | fujikurin A-D<br>ACT-Toxin II                     | [38, 39]  |
|                         | <i>DEP</i> _GCF        | <i>DEP</i> BGC        | depudecin                                         | [40]      |
|                         | <i>alt</i> _GCF        | <i>alt</i> BGC        | alternapyrone<br>alternapyrone B-F                | [41, 42]  |
| Terpene                 | <i>SQS1</i> _GCF       | <i>SQS1</i> BGC       | squalestatin S1                                   | [43]      |
|                         | <i>Ffsc</i> _GCF       | <i>Ffsc</i> BGC       | koraiol                                           | [44]      |
|                         | <i>GA</i> _GCF         | <i>GA</i> _BGC        | gibberellin                                       | [45]      |
|                         | <i>Tri</i> _GCF        | <i>tri</i> BGC        | deoxynivalenol<br>nivalenol<br>trichodiene-11-one | [46-48]   |
| NRPS                    | <i>chry</i> _GCF       | <i>chry</i> BGC       | chrysogine                                        | [49]      |
|                         | <i>san</i> _GCF        | <i>san</i> BGC        | sansaivamide                                      | [50]      |
|                         | <i>aba</i> _GCF        | <i>aba</i> BGC        | AbT1<br>KK-1                                      | [51, 52]  |
|                         | <i>APS</i> _GCF        | <i>APS</i> BGC        | apicidin                                          | [53]      |
| PKS-<br>NRPS-<br>Hybrid | <i>FSL</i> _GCF        | <i>FSL</i> BGC        | fusarielin H                                      | [54]      |
|                         | <i>ZEA</i> _GCF        | <i>ZEABGC</i>         | zearalenone                                       | [55]      |
| Other                   | <i>has</i> _GCF        | <i>has</i> BGC        | hexadehydroastechrome                             | [56]      |
|                         | <i>fsd</i> _GCF        | <i>fsd</i> BGC        | fusaridione A                                     | [57]      |

Table S4: Sequence identities (%) of Ffsc4 and its homologues.

| FNAPI_<br>12378 | FPANT_<br>_5545 | J7337_0<br>10974 | FDENT_<br>_14120 | FPCR_<br>8416 | FMEXI_<br>_13175 | FSUBG_<br>_8956 | FANTH_<br>_11676 | FACUT_<br>_6830 | FMUN_<br>D_8404 | FGLOB_<br>1_10057 | Ffsc4(F<br>FUJ_12<br>585) | FPRO_<br>12247 | FMAN_<br>11750 | BKA55<br>DRAFT<br>_562495 | BKA59<br>DRAFT<br>_435158 | jgi-p_F<br>ustri1_1<br>03320 | FGRM<br>N_1905 | FGSG_<br>11327 | HYE67_<br>005221 | FPSE_0<br>5683 | FPOAC<br>1_00750<br>2 | FVRRE<br>S_10751 | FPOAC<br>1_01296<br>7 | FPOAC<br>1_01381<br>3 | FPOAC<br>1_00389<br>4 | B016D<br>RAFT<br>_345894 | BKA59<br>DRAFT<br>_497532 | FSARC<br>_7662 | FDECE<br>_5463 |
|-----------------|-----------------|------------------|------------------|---------------|------------------|-----------------|------------------|-----------------|-----------------|-------------------|---------------------------|----------------|----------------|---------------------------|---------------------------|------------------------------|----------------|----------------|------------------|----------------|-----------------------|------------------|-----------------------|-----------------------|-----------------------|--------------------------|---------------------------|----------------|----------------|
| 100             | 99.18           | 99.4             | 98.08            | 98.9          | 97.53            | 98.08           | 97.53            | 97.81           | 97.53           | 96.44             | 96.71                     | 96.99          | 97.26          | 95.89                     | 88.49                     | 87.12                        | 86.07          | 81.94          | 81.64            | 82.47          | 81.1                  | 81.94            | 77.47                 | 77.2                  | 83.33                 | 85.36                    | 77.57                     | 83.79          | 75.35          |
| 99.18           | 100             | 99.4             | 97.81            | 98.63         | 97.26            | 97.81           | 97.26            | 97.53           | 97.26           | 96.16             | 96.44                     | 96.71          | 96.99          | 95.62                     | 88.22                     | 87.4                         | 85.79          | 82.22          | 81.92            | 82.74          | 81.37                 | 82.22            | 77.75                 | 77.47                 | 83.33                 | 85.08                    | 77.26                     | 83.79          | 74.79          |
| 99.4            | 99.4            | 100              | 98.51            | 99.4          | 97.91            | 98.51           | 97.91            | 98.51           | 98.21           | 97.01             | 97.31                     | 97.31          | 97.61          | 96.12                     | 88.06                     | 87.16                        | 85.71          | 82.73          | 82.69            | 83.28          | 82.09                 | 82.73            | 78.74                 | 78.44                 | 85.05                 | 85.84                    | 78.23                     | 83.83          | 79.88          |
| 98.08           | 97.81           | 98.51            | 100              | 98.63         | 97.26            | 97.81           | 97.26            | 97.53           | 97.26           | 96.16             | 96.44                     | 96.71          | 96.99          | 96.16                     | 87.95                     | 86.85                        | 85.52          | 81.94          | 81.64            | 82.47          | 81.1                  | 81.94            | 77.47                 | 77.2                  | 82.54                 | 85.36                    | 77.88                     | 83.79          | 74.79          |
| 98.9            | 98.63           | 99.4             | 98.63            | 100           | 98.08            | 98.63           | 98.08            | 98.36           | 98.08           | 96.99             | 97.26                     | 97.53          | 97.81          | 96.44                     | 88.77                     | 87.4                         | 86.35          | 82.5           | 82.19            | 83.01          | 81.64                 | 82.5             | 78.02                 | 77.75                 | 84.13                 | 85.91                    | 78.5                      | 84.34          | 75.35          |
| 97.53           | 97.26           | 97.91            | 97.26            | 98.08         | 100              | 99.18           | 98.08            | 96.99           | 96.71           | 96.71             | 96.44                     | 97.26          | 97.53          | 95.62                     | 87.67                     | 86.3                         | 85.24          | 82.5           | 82.19            | 82.74          | 81.64                 | 82.5             | 78.02                 | 77.75                 | 83.33                 | 85.64                    | 78.82                     | 84.62          | 75.62          |
| 98.08           | 97.81           | 98.51            | 97.81            | 98.63         | 99.18            | 100             | 98.9             | 97.53           | 97.26           | 97.26             | 96.99                     | 97.81          | 98.08          | 96.16                     | 88.22                     | 86.85                        | 85.79          | 82.78          | 82.47            | 83.29          | 81.92                 | 82.78            | 78.3                  | 78.02                 | 84.13                 | 86.19                    | 78.82                     | 84.34          | 75.62          |
| 97.53           | 97.26           | 97.91            | 97.26            | 98.08         | 98.08            | 98.9            | 100              | 96.99           | 96.71           | 96.99             | 96.71                     | 97.53          | 97.81          | 96.16                     | 87.67                     | 86.3                         | 85.24          | 82.78          | 82.47            | 83.29          | 81.92                 | 82.78            | 78.3                  | 78.02                 | 84.13                 | 86.19                    | 78.82                     | 84.34          | 75.62          |
| 97.81           | 97.53           | 98.51            | 97.53            | 98.36         | 96.99            | 97.53           | 96.99            | 100             | 98.08           | 96.99             | 96.99                     | 97.53          | 97.81          | 96.16                     | 88.22                     | 86.85                        | 85.79          | 82.78          | 82.47            | 83.29          | 82.19                 | 82.22            | 77.75                 | 77.47                 | 82.54                 | 85.64                    | 77.57                     | 84.07          | 75.07          |
| 97.53           | 97.26           | 98.21            | 97.26            | 98.08         | 96.71            | 97.26           | 96.71            | 98.08           | 100             | 96.99             | 96.99                     | 97.53          | 97.81          | 95.89                     | 88.49                     | 86.85                        | 86.07          | 82.5           | 82.47            | 83.01          | 81.92                 | 82.5             | 78.57                 | 78.3                  | 84.13                 | 85.91                    | 77.88                     | 84.34          | 75.62          |
| 96.44           | 96.16           | 97.01            | 96.16            | 96.99         | 96.71            | 97.26           | 96.99            | 96.99           | 96.99           | 100               | 98.08                     | 99.45          | 99.18          | 95.89                     | 87.95                     | 86.58                        | 85.79          | 82.22          | 81.92            | 82.74          | 81.64                 | 82.22            | 78.3                  | 78.3                  | 84.13                 | 85.64                    | 77.88                     | 84.07          | 75.07          |
| 96.71           | 96.44           | 97.31            | 96.44            | 97.26         | 96.44            | 96.99           | 96.71            | 96.99           | 96.99           | 98.08             | 100                       | 98.63          | 98.36          | 96.16                     | 87.95                     | 86.58                        | 86.35          | 82.5           | 82.19            | 83.01          | 81.92                 | 82.5             | 78.3                  | 78.3                  | 83.33                 | 85.91                    | 78.5                      | 84.34          | 75.62          |
| 96.99           | 96.71           | 97.31            | 96.71            | 97.53         | 97.26            | 97.81           | 97.53            | 97.53           | 97.53           | 99.45             | 98.63                     | 100            | 99.73          | 96.44                     | 88.22                     | 87.12                        | 86.35          | 82.78          | 82.47            | 83.29          | 82.19                 | 82.78            | 78.3                  | 78.3                  | 83.33                 | 86.19                    | 78.19                     | 84.34          | 75.35          |
| 97.26           | 96.99           | 97.61            | 96.99            | 97.81         | 97.53            | 98.08           | 97.81            | 97.81           | 97.81           | 99.18             | 98.36                     | 99.73          | 100            | 96.71                     | 88.49                     | 87.4                         | 86.63          | 83.06          | 82.74            | 83.56          | 82.47                 | 83.06            | 78.57                 | 78.3                  | 84.13                 | 86.46                    | 78.5                      | 84.62          | 75.62          |
| 95.89           | 95.62           | 96.12            | 96.16            | 96.44         | 95.62            | 96.16           | 96.16            | 96.16           | 95.89           | 95.89             | 96.16                     | 96.44          | 96.71          | 100                       | 87.12                     | 85.75                        | 84.68          | 82.78          | 82.47            | 83.29          | 81.92                 | 82.78            | 78.02                 | 77.75                 | 84.13                 | 86.19                    | 79.13                     | 85.16          | 75.62          |
| 88.49           | 88.22           | 88.06            | 87.95            | 88.77         | 87.67            | 88.22           | 87.67            | 88.22           | 88.49           | 87.95             | 87.95                     | 88.22          | 88.49          | 87.12                     | 100                       | 96.02                        | 90.03          | 81.44          | 81.15            | 81.97          | 81.15                 | 81.72            | 76.5                  | 76.23                 | 83.33                 | 84.89                    | 77.02                     | 83.38          | 73.2           |
| 87.12           | 87.4            | 87.16            | 86.85            | 87.4          | 86.3             | 86.85           | 86.3             | 86.85           | 86.85           | 86.58             | 86.58                     | 87.12          | 87.4           | 85.75                     | 96.02                     | 100                          | 88.41          | 81.16          | 80.87            | 81.69          | 81.15                 | 81.44            | 76.23                 | 75.96                 | 81.75                 | 84.07                    | 76.4                      | 82.56          | 72.65          |
| 86.07           | 85.79           | 85.71            | 85.52            | 86.35         | 85.24            | 85.79           | 85.24            | 85.79           | 86.07           | 85.79             | 86.35                     | 86.35          | 86.63          | 84.68                     | 90.03                     | 88.41                        | 100            | 80.83          | 80.28            | 81.11          | 80                    | 81.11            | 76.67                 | 76.39                 | 83.47                 | 83.57                    | 76.9                      | 80.61          | 71.91          |
| 81.94           | 82.22           | 82.73            | 81.94            | 82.5          | 82.5             | 82.78           | 82.78            | 82.78           | 82.5            | 82.22             | 82.5                      | 82.78          | 83.06          | 82.78                     | 81.44                     | 81.16                        | 80.83          | 100            | 99.45            | 99.72          | 97.51                 | 98.34            | 85.83                 | 85.56                 | 84.3                  | 93.85                    | 78.48                     | 80.83          | 70.87          |
| 81.64           | 81.92           | 82.69            | 81.64            | 82.19         | 82.19            | 82.47           | 82.47            | 82.47           | 82.47           | 81.92             | 82.19                     | 82.47          | 82.74          | 82.47                     | 81.15                     | 80.87                        | 80.28          | 99.45          | 100              | 99.18          | 96.99                 | 97.78            | 85.48                 | 85.21                 | 84.13                 | 93.39                    | 78.19                     | 80.55          | 70.72          |
| 82.47           | 82.74           | 83.28            | 82.47            | 83.01         | 82.74            | 83.29           | 83.29            | 83.29           | 83.01           | 82.74             | 83.01                     | 83.29          | 83.56          | 83.29                     | 81.97                     | 81.69                        | 81.11          | 99.72          | 99.18            | 100            | 97.27                 | 98.34            | 85.75                 | 85.48                 | 84.13                 | 94.21                    | 78.5                      | 81.1           | 71.55          |
| 81.1            | 81.37           | 82.09            | 81.1             | 81.64         | 81.64            | 81.92           | 81.92            | 82.19           | 81.92           | 81.64             | 81.92                     | 82.19          | 82.47          | 81.92                     | 81.15                     | 81.15                        | 80             | 97.51          | 96.99            | 97.27          | 100                   | 97.51            | 84.11                 | 83.84                 | 83.33                 | 93.11                    | 77.88                     | 80.6           | 70.8           |
| 81.94           | 82.22           | 82.73            | 81.94            | 82.5          | 82.5             | 82.78           | 82.78            | 82.22           | 82.5            | 82.22             | 82.5                      | 82.78          | 83.06          | 82.78                     | 81.72                     | 81.44                        | 81.11          | 98.34          | 97.78            | 98.34          | 97.51                 | 100              | 85.83                 | 85.56                 | 85.12                 | 93.85                    | 78.48                     | 81.11          | 71.15          |
| 77.47           | 77.75           | 78.74            | 77.47            | 78.02         | 78.02            | 78.3            | 78.3             | 77.75           | 78.57           | 78.3              | 78.3                      | 78.3           | 78.57          | 78.02                     | 76.5                      | 76.23                        | 76.67          | 85.83          | 85.48            | 85.75          | 84.11                 | 85.83            | 100                   | 99.73                 | 100                   | 85.67                    | 76.64                     | 77.26          | 69.34          |
| 77.2            | 77.47           | 78.44            | 77.2             | 77.75         | 77.75            | 78.02           | 78.02            | 77.47           | 78.3            | 78.3              | 78.3                      | 78.3           | 78.3           | 77.75                     | 76.23                     | 75.96                        | 76.39          | 85.56          | 85.21            | 85.48          | 83.84                 | 85.56            | 99.73                 | 100                   | 99.21                 | 85.4                     | 76.32                     | 76.99          | 69.06          |
| 83.33           | 83.33           | 85.05            | 82.54            | 84.13         | 83.33            | 84.13           | 84.13            | 82.54           | 84.13           | 84.13             | 83.33                     | 83.33          | 84.13          | 84.13                     | 83.33                     | 81.75                        | 83.47          | 84.3           | 84.13            | 84.13          | 83.33                 | 85.12            | 100                   | 99.21                 | 100                   | 86.51                    | 78.79                     | 80.95          | 67.2           |
| 85.36           | 85.08           | 85.84            | 85.36            | 85.91         | 85.64            | 86.19           | 86.19            | 85.64           | 85.91           | 85.64             | 85.91                     | 86.19          | 86.46          | 86.19                     | 84.89                     | 84.07                        | 83.57          | 93.85          | 93.39            | 94.21          | 93.11                 | 93.85            | 85.67                 | 85.4                  | 86.51                 | 100                      | 79                        | 83.43          | 74.37          |
| 77.57           | 77.26           | 78.23            | 77.88            | 78.5          | 78.82            | 78.82           | 78.82            | 77.57           | 77.88           | 77.88             | 78.5                      | 78.19          | 78.5           | 79.13                     | 77.02                     | 76.4                         | 76.9           | 78.48          | 78.19            | 78.5           | 77.88                 | 78.48            | 76.64                 | 76.32                 | 78.79                 | 79                       | 100                       | 80.86          | 70.72          |
| 83.79           | 83.79           | 83.83            | 83.79            | 84.34         | 84.62            | 84.34           | 84.34            | 84.07           | 84.34           | 84.07             | 84.34                     | 84.34          | 84.62          | 85.16                     | 83.38                     | 82.56                        | 80.61          | 80.83          | 80.55            | 81.1           | 80.6                  | 81.11            | 77.26                 | 76.99                 | 80.95                 | 83.43                    | 80.86                     | 100            | 76.57          |
| 75.35           | 74.79           | 79.88            | 74.79            | 75.35         | 75.62            | 75.62           | 75.62            | 75.07           | 75.62           | 75.07             | 75.62                     | 75.35          | 75.62          | 75.62                     | 73.2                      | 72.65                        | 71.91          | 70.87          | 70.72            | 71.55          | 70.8                  | 71.15            | 69.34                 | 69.06                 | 67.2                  | 74.37                    | 70.72                     | 76.57          | 100            |

Table S5: Sequence identities (%) of Ffsc6 and its homologues.

| BKA5<br>5DRA<br>FT_67<br>8444 | FOIG<br>_1479<br>6 | FOY<br>G_139<br>12 | FMA<br>N_132<br>18 | Ffsc6(<br>FFUJ_<br>10353) | FGLO<br>B1_91<br>81 | FPRO<br>_1386<br>1 | FDEN<br>T_419<br>3 | FPCI<br>R_133<br>13 | FMEX<br>I_210<br>9 | FSUB<br>G_793<br>5 | FACU<br>T_671<br>0 | FMU<br>ND_9<br>317 | FNAP<br>I_668<br>0 | FPAN<br>T_656<br>8 | FVEG<br>_1370<br>7 | J7337<br>_0122<br>60 | FSAR<br>C_823<br>0 | jgi_p_<br>Fustri<br>1_457<br>669 | BKA5<br>9DRA<br>FT_48<br>8114 | FPOA<br>C1_00<br>5877 | FVRR<br>ES_06<br>486 | HYE6<br>7_001<br>787 | FGSG<br>_0349<br>4 |
|-------------------------------|--------------------|--------------------|--------------------|---------------------------|---------------------|--------------------|--------------------|---------------------|--------------------|--------------------|--------------------|--------------------|--------------------|--------------------|--------------------|----------------------|--------------------|----------------------------------|-------------------------------|-----------------------|----------------------|----------------------|--------------------|
| 100                           | 95.15              | 94.61              | 88.68              | 88.41                     | 85.35               | 88.95              | 86.46              | 85.68               | 85.48              | 79.51              | 84.37              | 87.4               | 83.56              | 84.11              | 84.66              | 84.66                | 67.31              | 74.29                            | 75.34                         | 70.64                 | 71.23                | 68.22                | 67.67              |
| 95.15                         | 100                | 98.38              | 92.45              | 92.18                     | 87.61               | 92.18              | 89.23              | 88.65               | 87.67              | 81.13              | 86.25              | 89.59              | 86.58              | 86.85              | 87.4               | 87.67                | 65.66              | 74.58                            | 74.79                         | 70.64                 | 71.23                | 68.22                | 67.67              |
| 94.61                         | 98.38              | 100                | 92.99              | 92.72                     | 88.17               | 92.45              | 89.5               | 88.38               | 87.4               | 80.86              | 86.52              | 89.32              | 86.3               | 86.58              | 87.12              | 87.4                 | 65.66              | 74.29                            | 74.52                         | 70.36                 | 70.96                | 67.95                | 67.67              |
| 88.68                         | 92.45              | 92.99              | 100                | 98.38                     | 92.96               | 97.3               | 89.5               | 88.65               | 87.67              | 81.4               | 84.64              | 89.32              | 86.58              | 87.95              | 87.95              | 88.49                | 64.84              | 71.75                            | 71.51                         | 68.98                 | 68.49                | 65.75                | 65.21              |
| 88.41                         | 92.18              | 92.72              | 98.38              | 100                       | 94.37               | 98.92              | 89.78              | 88.92               | 87.95              | 81.67              | 85.18              | 89.59              | 86.85              | 88.22              | 88.22              | 88.77                | 64.56              | 72.32                            | 72.05                         | 69.25                 | 69.04                | 66.3                 | 65.75              |
| 85.35                         | 87.61              | 88.17              | 92.96              | 94.37                     | 100                 | 94.37              | 85.31              | 85.88               | 84.18              | 84.7               | 90.16              | 85.88              | 83.33              | 84.75              | 83.9               | 84.46                | 64.76              | 70.2                             | 71.35                         | 68.19                 | 68.48                | 65.62                | 65.04              |
| 88.95                         | 92.18              | 92.45              | 97.3               | 98.92                     | 94.37               | 100                | 89.78              | 88.92               | 87.95              | 81.67              | 85.18              | 89.59              | 86.85              | 88.22              | 87.67              | 88.22                | 65.38              | 72.32                            | 72.6                          | 69.81                 | 69.59                | 66.85                | 66.3               |
| 86.46                         | 89.23              | 89.5               | 89.5               | 89.78                     | 85.31               | 89.78              | 100                | 97.53               | 92.86              | 87.64              | 85.16              | 94.51              | 92.58              | 92.31              | 92.31              | 92.86                | 63.79              | 69.86                            | 70.11                         | 67.69                 | 68.72                | 66.2                 | 65.36              |
| 85.68                         | 88.65              | 88.38              | 88.65              | 88.92                     | 85.88               | 88.92              | 97.53              | 100                 | 92.18              | 81.59              | 78.61              | 93.26              | 92.57              | 91.91              | 91.91              | 92.45                | 63.39              | 70.42                            | 69.4                          | 67.49                 | 67.49                | 64.21                | 63.39              |
| 85.48                         | 87.67              | 87.4               | 87.67              | 87.95                     | 84.18               | 87.95              | 92.86              | 92.18               | 100                | 88.14              | 82.21              | 95.15              | 91.64              | 92.72              | 92.99              | 93.53                | 62.88              | 70.99                            | 71.19                         | 66.76                 | 67.04                | 64.54                | 65.1               |
| 79.51                         | 81.13              | 80.86              | 81.4               | 81.67                     | 84.7                | 81.67              | 87.64              | 81.59               | 88.14              | 100                | 84.73              | 87.33              | 81.77              | 85.44              | 85.44              | 85.98                | 60.92              | 66.67                            | 66.04                         | 63.04                 | 63.61                | 60.38                | 59.84              |
| 84.37                         | 86.25              | 86.52              | 84.64              | 85.18                     | 90.16               | 85.18              | 85.16              | 78.61               | 82.21              | 84.73              | 100                | 84.37              | 77.47              | 81.67              | 81.13              | 81.67                | 61.14              | 69.75                            | 69.29                         | 63.84                 | 64.67                | 61.96                | 61.14              |
| 87.4                          | 89.59              | 89.32              | 89.32              | 89.59                     | 85.88               | 89.59              | 94.51              | 93.26               | 95.15              | 87.33              | 84.37              | 100                | 94.88              | 96.23              | 95.69              | 96.23                | 63.43              | 70.99                            | 71.19                         | 67.87                 | 68.42                | 65.65                | 64.82              |
| 83.56                         | 86.58              | 86.3               | 86.58              | 86.85                     | 83.33               | 86.85              | 92.58              | 92.57               | 91.64              | 81.77              | 77.47              | 94.88              | 100                | 95.42              | 93.8               | 94.34                | 62.6               | 68.45                            | 68.7                          | 66.2                  | 66.76                | 64.54                | 63.16              |
| 84.11                         | 86.85              | 86.58              | 87.95              | 88.22                     | 84.75               | 88.22              | 92.31              | 91.91               | 92.72              | 85.44              | 81.67              | 96.23              | 95.42              | 100                | 96.23              | 96.77                | 61.5               | 69.3                             | 69.53                         | 66.76                 | 67.31                | 64.54                | 63.99              |
| 84.66                         | 87.4               | 87.12              | 87.95              | 88.22                     | 83.9                | 87.67              | 92.31              | 91.91               | 92.99              | 85.44              | 81.13              | 95.69              | 93.8               | 96.23              | 100                | 99.19                | 62.05              | 68.45                            | 68.7                          | 65.93                 | 66.48                | 63.71                | 63.16              |
| 84.66                         | 87.67              | 87.4               | 88.49              | 88.77                     | 84.46               | 88.22              | 92.86              | 92.45               | 93.53              | 85.98              | 81.67              | 96.23              | 94.34              | 96.77              | 99.19              | 100                  | 62.05              | 68.73                            | 68.98                         | 65.93                 | 66.48                | 63.71                | 63.16              |
| 67.31                         | 65.66              | 65.66              | 64.84              | 64.56                     | 64.76               | 65.38              | 63.79              | 63.39               | 62.88              | 60.92              | 61.14              | 63.43              | 62.6               | 61.5               | 62.05              | 62.05                | 100                | 70                               | 70.27                         | 68.94                 | 70                   | 68.11                | 67.57              |
| 74.29                         | 74.58              | 74.29              | 71.75              | 72.32                     | 70.2                | 72.32              | 69.86              | 70.42               | 70.99              | 66.67              | 69.75              | 70.99              | 68.45              | 69.3               | 68.45              | 68.73                | 70                 | 100                              | 93.89                         | 80.56                 | 80.28                | 79.72                | 79.72              |
| 75.34                         | 74.79              | 74.52              | 71.51              | 72.05                     | 71.35               | 72.6               | 70.11              | 69.4                | 71.19              | 66.04              | 69.29              | 71.19              | 68.7               | 69.53              | 68.7               | 68.98                | 70.27              | 93.89                            | 100                           | 80.11                 | 80.86                | 80.32                | 80.32              |
| 70.64                         | 70.64              | 70.36              | 68.98              | 69.25                     | 68.19               | 69.81              | 67.69              | 67.49               | 66.76              | 63.04              | 63.84              | 67.87              | 66.2               | 66.76              | 65.93              | 65.93                | 68.94              | 80.56                            | 80.11                         | 100                   | 94.55                | 91.83                | 91.28              |
| 71.23                         | 71.23              | 70.96              | 68.49              | 69.04                     | 68.48               | 69.59              | 68.72              | 67.49               | 67.04              | 63.61              | 64.67              | 68.42              | 66.76              | 67.31              | 66.48              | 66.48                | 70                 | 80.28                            | 80.86                         | 94.55                 | 100                  | 92.45                | 91.91              |
| 68.22                         | 68.22              | 67.95              | 65.75              | 66.3                      | 65.62               | 66.85              | 66.2               | 64.21               | 64.54              | 60.38              | 61.96              | 65.65              | 64.54              | 64.54              | 63.71              | 63.71                | 68.11              | 79.72                            | 80.32                         | 91.83                 | 92.45                | 100                  | 98.65              |
| 67.67                         | 67.67              | 67.67              | 65.21              | 65.75                     | 65.04               | 66.3               | 65.36              | 63.39               | 65.1               | 59.84              | 61.14              | 64.82              | 63.16              | 63.99              | 63.16              | 63.16                | 67.57              | 79.72                            | 80.32                         | 91.28                 | 91.91                | 98.65                | 100                |

Table S6: Sequence identities (%) of STC5 and homologues.

| FPC<br>IR_3<br>536 | FPA<br>NT_<br>9745 | FDE<br>NT_<br>6295 | FAC<br>UT_<br>9293 | FSU<br>BG_<br>1573 | FAN<br>TH_<br>5434 | FME<br>XL_4<br>348 | FPR<br>O_1<br>5464 | STC<br>5(FF<br>UJ_1<br>1739<br>) | FGL<br>OB1<br>_235<br>9 | FM<br>AN_<br>1488<br>7 | FOY<br>G_1<br>5697 | FOI<br>G_1<br>0183 | FGS<br>G_0<br>8181 | HYE<br>67_0<br>0026<br>0 | FPS<br>E_10<br>885 | FVR<br>RES<br>_046<br>82 | FPO<br>AC1<br>_004<br>210 | FSA<br>RC_<br>5213 |
|--------------------|--------------------|--------------------|--------------------|--------------------|--------------------|--------------------|--------------------|----------------------------------|-------------------------|------------------------|--------------------|--------------------|--------------------|--------------------------|--------------------|--------------------------|---------------------------|--------------------|
| 100                | 97.<br>76          | 96.<br>76          | 97.<br>51          | 96.<br>51          | 96.<br>51          | 95.<br>76          | 96.<br>51          | 95.<br>26                        | 96.<br>01               | 97.<br>26              | 94.<br>51          | 94.<br>76          | 88.<br>53          | 89.<br>53                | 88.<br>78          | 86.<br>28                | 87.<br>03                 | 80.<br>1           |
| 97.<br>76          | 100                | 96.<br>76          | 98.<br>25          | 97.<br>51          | 97.<br>51          | 96.<br>76          | 97.<br>26          | 96.<br>01                        | 97.<br>01               | 97.<br>51              | 94.<br>76          | 95.<br>26          | 88.<br>53          | 89.<br>53                | 89.<br>28          | 86.<br>53                | 87.<br>53                 | 80.<br>37          |
| 96.<br>76          | 96.<br>76          | 100                | 97.<br>26          | 96.<br>26          | 96.<br>26          | 95.<br>76          | 96.<br>51          | 95.<br>26                        | 96.<br>01               | 97.<br>01              | 95.<br>01          | 95.<br>51          | 88                 | 89.<br>03                | 88.<br>28          | 85.<br>79                | 86.<br>78                 | 79.<br>58          |
| 97.<br>51          | 98.<br>25          | 97.<br>26          | 100                | 97.<br>76          | 97.<br>76          | 97.<br>26          | 98                 | 96.<br>76                        | 97.<br>51               | 98.<br>75              | 95.<br>76          | 95.<br>76          | 89.<br>6           | 90.<br>52                | 89.<br>53          | 87.<br>03                | 88.<br>03                 | 80.<br>1           |
| 96.<br>51          | 97.<br>51          | 96.<br>26          | 97.<br>76          | 100                | 100                | 98                 | 97.<br>26          | 96.<br>01                        | 97.<br>26               | 97.<br>51              | 94.<br>76          | 95.<br>01          | 88.<br>53          | 89.<br>53                | 89.<br>03          | 86.<br>78                | 87.<br>78                 | 80.<br>89          |
| 96.<br>51          | 97.<br>51          | 96.<br>26          | 97.<br>76          | 100                | 100                | 98                 | 97.<br>26          | 96.<br>01                        | 97.<br>26               | 97.<br>51              | 94.<br>76          | 95.<br>01          | 88.<br>53          | 89.<br>53                | 89.<br>03          | 86.<br>78                | 87.<br>78                 | 80.<br>89          |
| 95.<br>76          | 96.<br>76          | 95.<br>76          | 97.<br>26          | 98                 | 98                 | 100                | 96.<br>76          | 96.<br>01                        | 96.<br>76               | 97.<br>51              | 94.<br>26          | 94.<br>51          | 87.<br>2           | 88.<br>28                | 87.<br>78          | 85.<br>29                | 86.<br>78                 | 79.<br>58          |
| 96.<br>51          | 97.<br>26          | 96.<br>51          | 98                 | 97.<br>26          | 97.<br>26          | 96.<br>76          | 100                | 98.<br>25                        | 99                      | 98.<br>75              | 95.<br>76          | 96.<br>51          | 88.<br>27          | 89.<br>03                | 88.<br>78          | 87.<br>78                | 88.<br>28                 | 80.<br>89          |
| 95.<br>26          | 96.<br>01          | 95.<br>26          | 96.<br>76          | 96.<br>01          | 96.<br>01          | 96.<br>01          | 98.<br>25          | 100                              | 97.<br>76               | 97.<br>51              | 94.<br>51          | 95.<br>26          | 87.<br>2           | 88.<br>28                | 87.<br>78          | 86.<br>53                | 87.<br>03                 | 79.<br>84          |
| 96.<br>01          | 97.<br>01          | 96.<br>01          | 97.<br>51          | 97.<br>26          | 97.<br>26          | 96.<br>76          | 99                 | 97.<br>76                        | 100                     | 98.<br>25              | 95.<br>26          | 96.<br>51          | 88                 | 88.<br>53                | 88.<br>03          | 86.<br>78                | 87.<br>28                 | 80.<br>63          |
| 97.<br>26          | 97.<br>51          | 97.<br>01          | 98.<br>75          | 97.<br>51          | 97.<br>51          | 97.<br>51          | 98.<br>75          | 97.<br>51                        | 98.<br>25               | 100                    | 95.<br>76          | 96.<br>01          | 89.<br>07          | 89.<br>78                | 88.<br>78          | 86.<br>78                | 87.<br>78                 | 80.<br>37          |
| 94.<br>51          | 94.<br>76          | 95.<br>01          | 95.<br>76          | 94.<br>76          | 94.<br>76          | 94.<br>26          | 95.<br>76          | 94.<br>51                        | 95.<br>26               | 95.<br>76              | 100                | 98.<br>25          | 87.<br>47          | 87.<br>53                | 87.<br>03          | 85.<br>54                | 85.<br>79                 | 80.<br>89          |
| 94.<br>76          | 95.<br>26          | 95.<br>51          | 95.<br>76          | 95.<br>01          | 95.<br>01          | 94.<br>51          | 96.<br>51          | 95.<br>26                        | 96.<br>51               | 96.<br>01              | 98.<br>25          | 100                | 86.<br>67          | 87.<br>53                | 87.<br>03          | 86.<br>28                | 86.<br>53                 | 81.<br>68          |
| 88.<br>53          | 88.<br>53          | 88                 | 89.<br>6           | 88.<br>53          | 88.<br>53          | 87.<br>2           | 88.<br>27          | 87.<br>2                         | 88                      | 89.<br>07              | 87.<br>47          | 86.<br>67          | 100                | 98.<br>94                | 96.<br>54          | 90.<br>67                | 91.<br>2                  | 78.<br>37          |
| 89.<br>53          | 89.<br>53          | 89.<br>03          | 90.<br>52          | 89.<br>53          | 89.<br>53          | 88.<br>28          | 89.<br>03          | 88.<br>28                        | 88.<br>53               | 89.<br>78              | 87.<br>53          | 87.<br>53          | 98.<br>94          | 100                      | 96.<br>77          | 91.<br>52                | 92.<br>02                 | 79.<br>32          |
| 88.<br>78          | 89.<br>28          | 88.<br>28          | 89.<br>53          | 89.<br>03          | 89.<br>03          | 87.<br>78          | 88.<br>78          | 87.<br>78                        | 88.<br>03               | 88.<br>78              | 87.<br>03          | 87.<br>03          | 96.<br>54          | 96.<br>77                | 100                | 92.<br>02                | 92.<br>52                 | 79.<br>58          |
| 86.<br>28          | 86.<br>53          | 85.<br>79          | 87.<br>03          | 86.<br>78          | 86.<br>78          | 85.<br>29          | 87.<br>78          | 86.<br>53                        | 86.<br>78               | 86.<br>78              | 85.<br>54          | 86.<br>28          | 90.<br>67          | 91.<br>52                | 92.<br>02          | 100                      | 98.<br>25                 | 78.<br>53          |
| 87.<br>03          | 87.<br>53          | 86.<br>78          | 88.<br>03          | 87.<br>78          | 87.<br>78          | 86.<br>78          | 88.<br>28          | 87.<br>03                        | 87.<br>28               | 87.<br>78              | 85.<br>79          | 86.<br>53          | 91.<br>2           | 92.<br>02                | 92.<br>52          | 98.<br>25                | 100                       | 78.<br>8           |
| 80.<br>1           | 80.<br>37          | 79.<br>58          | 80.<br>1           | 80.<br>89          | 80.<br>89          | 79.<br>58          | 80.<br>89          | 79.<br>84                        | 80.<br>63               | 80.<br>37              | 80.<br>89          | 81.<br>68          | 78.<br>37          | 79.<br>32                | 79.<br>58          | 78.<br>53                | 78.<br>8                  | 100                |

Table S7: Sequence identities (%) of STC3 and homologues.

| <b>FVRRES_13838</b> | <b>FGLOB1_629</b> | <b>STC3(FFUJ_04067)</b> | <b>FPRO_03449</b> |
|---------------------|-------------------|-------------------------|-------------------|
| 100                 | 82.38             | 81.9                    | 81.43             |
| 82.38               | 100               | 99.16                   | 98.88             |
| 81.9                | 99.16             | 100                     | 98.6              |
| 81.43               | 98.88             | 98.6                    | 100               |

Table S8: Sequence identities (%) of CLM1 and homologues.

| <b>FPSE_07410</b> | <b>HYE67_0111<br/>82</b> | <b>CLM1(FGSG<br/>_10397)</b> | <b>FVRRES_137<br/>51</b> | <b>FDECE_1558<br/>3</b> | <b>jgi.p_Fustri1<br/>_646467</b> | <b>BKA59DRAF<br/>T_555427</b> |
|-------------------|--------------------------|------------------------------|--------------------------|-------------------------|----------------------------------|-------------------------------|
| 100               | 99.12                    | 98.23                        | 76.7                     | 71.04                   | 71.6                             | 71.98                         |
| 99.12             | 100                      | 99.12                        | 76.7                     | 71.04                   | 71.89                            | 72.27                         |
| 98.23             | 99.12                    | 100                          | 76.7                     | 71.34                   | 71.6                             | 71.98                         |
| 76.7              | 76.7                     | 76.7                         | 100                      | 72.97                   | 75.51                            | 76.45                         |
| 71.04             | 71.04                    | 71.34                        | 72.97                    | 100                     | 78.57                            | 79.53                         |
| 71.6              | 71.89                    | 71.6                         | 75.51                    | 78.57                   | 100                              | 95.39                         |
| 71.98             | 72.27                    | 71.98                        | 76.45                    | 79.53                   | 95.39                            | 100                           |

Table S9: Sequence identities (%) of TRI5 and homologues.

| <b>FPSE_12160</b> | <b>HYE67_0018<br/>32</b> | <b>FGSG_03537</b> | <b>FPOAC1_005<br/>923</b> | <b>FVRRES_065<br/>32</b> | <b>TRI5(TOX5)</b> | <b>B0J16DRAF<br/>T_404726</b> |
|-------------------|--------------------------|-------------------|---------------------------|--------------------------|-------------------|-------------------------------|
| 100               | 97.07                    | 98.13             | 91.73                     | 92.27                    | 92                | 85.52                         |
| 97.07             | 100                      | 97.6              | 90.4                      | 90.93                    | 90.4              | 84.99                         |
| 98.13             | 97.6                     | 100               | 91.47                     | 92                       | 91.47             | 86.33                         |
| 91.73             | 90.4                     | 91.47             | 100                       | 97.88                    | 96.82             | 88.24                         |
| 92.27             | 90.93                    | 92                | 97.88                     | 100                      | 98.68             | 87.97                         |
| 92                | 90.4                     | 91.47             | 96.82                     | 98.68                    | 100               | 87.17                         |
| 85.52             | 84.99                    | 86.33             | 88.24                     | 87.97                    | 87.17             | 100                           |



Table S10: Sequence identities (%) of FlvE and homologues.

| <b>LCI18_010754</b> | <b>LCI18_011228</b> | <b>NECHADRAFT_97884</b> | <b>NCS54_01458300</b> | <b>NCS57_01441900</b> | <b>flvE</b> |
|---------------------|---------------------|-------------------------|-----------------------|-----------------------|-------------|
| 100.00              | 100.00              | 95.15                   | 91.67                 | 96.52                 | 50.90       |
| 100.00              | 100.00              | 95.15                   | 91.67                 | 96.52                 | 50.90       |
| 95.15               | 95.15               | 100.00                  | 90.29                 | 95.66                 | 52.25       |
| 91.67               | 91.67               | 90.29                   | 100.00                | 93.06                 | 47.70       |
| 96.52               | 96.52               | 95.66                   | 93.06                 | 100.00                | 50.65       |
| 50.90               | 50.90               | 52.25                   | 47.70                 | 50.65                 | 100.00      |

Table S11: Sequence identities (%) of DpfgD and homologues.

| <b>FPSE_10841</b> | <b>dpfgD(FGSG_04591)</b> | <b>jgi.p_Fustri1_542810</b> | <b>BKA55DRAFT_506145</b> |
|-------------------|--------------------------|-----------------------------|--------------------------|
| 100               | 93.23                    | 87.38                       | 89.73                    |
| 93.23             | 100                      | 86.24                       | 87.92                    |
| 87.38             | 86.24                    | 100                         | 93.88                    |
| 89.73             | 87.92                    | 93.88                       | 100                      |

Table S12: Sequence identities (%) of GGS and homologues.

| FDE<br>CE_<br>1297<br>3 | NCS<br>57_0<br>0750<br>400 | NCS<br>54_0<br>0710<br>300 | LCH<br>8_01<br>1732 | BOJ1<br>5DR<br>AFT<br>_391<br>762 | NEC<br>HA<br>DR<br>AFT<br>_695<br>30 | FSA<br>RC_<br>1442<br>4 | FGR<br>MN<br>_446<br>2 | jgl-p<br>_Fus<br>tri1_<br>1332<br>2 | BKA<br>59D<br>RAF<br>T_46<br>2499 | BOJ1<br>6DR<br>AFT<br>_677<br>42 | FVR<br>RES<br>_035<br>20 | FPO<br>AC1<br>_003<br>180 | HYE<br>67_0<br>1087<br>9 | FPS<br>E_00<br>459 | FGS<br>G_1<br>0097 | BKA<br>55D<br>RAF<br>T_50<br>8582 | FOI<br>G_0<br>7211 | FOY<br>G_0<br>8127 | FAC<br>UT_<br>3379 | FME<br>XL1<br>0918 | FAN<br>TH_<br>4007 | FSU<br>BG_<br>9424 | FPC<br>IR_9<br>600 | FGL<br>OB1<br>_119<br>67 | FPR<br>O_0<br>7922 | FFU<br>J_07<br>352 | GG<br>S | FM<br>AN_<br>0752<br>8 | FDE<br>NT_<br>1333<br>8 | FM<br>UN<br>D_9<br>065 | J733<br>7_00<br>5732 | FVE<br>G_0<br>2819 | FPA<br>NT_<br>8144 | FNA<br>PL1<br>3184 |
|-------------------------|----------------------------|----------------------------|---------------------|-----------------------------------|--------------------------------------|-------------------------|------------------------|-------------------------------------|-----------------------------------|----------------------------------|--------------------------|---------------------------|--------------------------|--------------------|--------------------|-----------------------------------|--------------------|--------------------|--------------------|--------------------|--------------------|--------------------|--------------------|--------------------------|--------------------|--------------------|---------|------------------------|-------------------------|------------------------|----------------------|--------------------|--------------------|--------------------|
| 100                     | 88.7                       | 88.7                       | 88.46               | 88.46                             | 87.98                                | 86.47                   | 83.09                  | 83.33                               | 83.57                             | 82.61                            | 82.61                    | 82.61                     | 81.64                    | 81.4               | 82.13              | 84.62                             | 84.13              | 84.13              | 83.41              | 83.41              | 85.28              | 83.41              | 83.17              | 83.41                    | 83.41              | 82.93              | 83.17   | 83.41                  | 83.41                   | 83.17                  | 83.41                | 83.65              | 82.93              |                    |
| 88.7                    | 100                        | 99.52                      | 99.04               | 98.81                             | 98.33                                | 90.1                    | 86.71                  | 87.2                                | 87.68                             | 85.51                            | 86.47                    | 86.23                     | 85.27                    | 85.02              | 85.75              | 87.26                             | 87.5               | 87.5               | 86.54              | 86.78              | 87.82              | 86.78              | 86.54              | 87.02                    | 87.02              | 86.54              | 87.02   | 86.78                  | 86.78                   | 86.3                   | 86.78                | 87.02              | 86.3               |                    |
| 88.7                    | 99.52                      | 100                        | 99.04               | 99.29                             | 98.33                                | 89.86                   | 86.47                  | 86.96                               | 87.44                             | 85.27                            | 86.47                    | 86.23                     | 85.51                    | 85.27              | 85.99              | 87.26                             | 87.5               | 87.5               | 86.54              | 86.78              | 87.82              | 86.78              | 86.54              | 87.02                    | 87.02              | 86.54              | 87.02   | 86.78                  | 86.78                   | 86.3                   | 86.78                | 87.02              | 86.3               |                    |
| 88.46                   | 99.04                      | 99.04                      | 100                 | 98.8                              | 98.33                                | 90.1                    | 86.23                  | 86.71                               | 87.2                              | 85.02                            | 86.47                    | 86.23                     | 85.51                    | 85.27              | 85.99              | 87.02                             | 87.26              | 87.26              | 86.3               | 86.54              | 87.56              | 86.54              | 86.3               | 86.78                    | 86.78              | 86.3               | 86.78   | 86.54                  | 86.54                   | 86.06                  | 86.54                | 86.78              | 86.06              |                    |
| 88.46                   | 98.81                      | 99.29                      | 98.8                | 100                               | 98.57                                | 89.61                   | 85.75                  | 86.23                               | 86.71                             | 84.54                            | 85.75                    | 85.51                     | 84.78                    | 84.54              | 85.27              | 86.54                             | 86.78              | 86.82              | 85.06              | 86.31              | 86.06              | 85.82              | 86.3               | 86.78                    | 86.3               | 85.82              | 86.3    | 86.06                  | 86.06                   | 85.58                  | 86.06                | 86.3               | 85.58              |                    |
| 87.98                   | 98.33                      | 98.33                      | 98.33               | 98.57                             | 100                                  | 88.89                   | 85.02                  | 85.51                               | 85.99                             | 84.3                             | 85.02                    | 84.78                     | 84.06                    | 83.82              | 84.54              | 86.3                              | 86.54              | 86.58              | 85.82              | 86.8               | 85.82              | 85.82              | 86.06              | 86.06                    | 86.06              | 85.58              | 86.06   | 85.82                  | 85.82                   | 85.34                  | 86.82                | 86.06              | 85.34              |                    |
| 86.47                   | 90.86                      | 89.1                       | 90.61               | 89.88                             | 100                                  | 89.89                   | 89.9                   | 89.9                                | 90.38                             | 89.18                            | 88.7                     | 88.94                     | 88.22                    | 87.98              | 88.22              | 91.11                             | 91.59              | 91.59              | 91.11              | 90.87              | 91.62              | 91.11              | 90.87              | 91.11                    | 91.11              | 91.62              | 87      | 91.11                  | 91.11                   | 91.87                  | 91.11                | 91.11              | 90.62              |                    |
| 83.09                   | 86.71                      | 86.47                      | 86.23               | 85.75                             | 85.02                                | 89.9                    | 100                    | 97.12                               | 97.6                              | 89.66                            | 90.38                    | 90.62                     | 89.42                    | 89.42              | 89.18              | 91.59                             | 91.07              | 92.07              | 91.59              | 91.83              | 92.39              | 91.59              | 90.35              | 90.87                    | 90.87              | 90.38              | 90.62   | 91.35                  | 91.11                   | 91.11                  | 91.35                | 91.59              | 91.87              |                    |
| 83.33                   | 87.2                       | 86.96                      | 86.71               | 86.23                             | 85.51                                | 89.9                    | 97.12                  | 100                                 | 99.52                             | 89.9                             | 90.62                    | 90.87                     | 89.66                    | 89.66              | 89.42              | 92.07                             | 92.07              | 92.07              | 91.59              | 92.07              | 92.39              | 91.35              | 91.35              | 91.35                    | 91.35              | 90.87              | 91.11   | 91.35                  | 91.11                   | 91.35                  | 91.11                | 91.35              | 91.59              | 91.87              |
| 83.57                   | 87.68                      | 87.44                      | 87.2                | 86.71                             | 85.99                                | 90.38                   | 97.6                   | 99.52                               | 100                               | 90.14                            | 90.87                    | 91.11                     | 89.9                     | 89.9               | 89.66              | 92.07                             | 92.55              | 92.55              | 92.07              | 92.55              | 92.89              | 91.31              | 91.83              | 91.83                    | 91.83              | 91.35              | 91.59   | 91.83                  | 91.59                   | 91.83                  | 91.59                | 91.83              | 92.07              | 91.35              |
| 82.61                   | 85.51                      | 85.27                      | 85.02               | 84.54                             | 84.3                                 | 89.18                   | 89.66                  | 89.9                                | 90.14                             | 100                              | 94.23                    | 93.75                     | 93.27                    | 93.03              | 93.03              | 92.07                             | 92.07              | 92.07              | 90.87              | 91.11              | 91.37              | 91.35              | 90.87              | 90.87                    | 90.87              | 90.38              | 90.62   | 90.87                  | 90.62                   | 90.38                  | 90.87                | 90.87              | 90.38              |                    |
| 82.61                   | 86.47                      | 86.47                      | 86.47               | 85.75                             | 85.02                                | 88.7                    | 90.38                  | 90.62                               | 90.87                             | 94.23                            | 100                      | 98.32                     | 97.12                    | 96.88              | 96.88              | 92.79                             | 93.03              | 93.03              | 91.59              | 92.07              | 92.13              | 92.07              | 91.59              | 92.31                    | 92.07              | 92.07              | 91.59   | 91.83                  | 91.59                   | 91.35                  | 91.59                | 91.35              | 91.59              | 91.59              |
| 82.61                   | 86.23                      | 86.23                      | 86.23               | 85.51                             | 84.78                                | 88.94                   | 90.62                  | 90.87                               | 91.11                             | 93.75                            | 98.32                    | 100                       | 97.6                     | 97.36              | 97.36              | 93.03                             | 93.27              | 93.27              | 91.83              | 92.31              | 92.39              | 92.31              | 91.83              | 92.07                    | 91.83              | 91.83              | 91.35   | 91.59                  | 91.83                   | 91.59                  | 91.83                | 91.83              | 91.83              | 91.83              |
| 81.64                   | 85.27                      | 85.51                      | 85.51               | 84.78                             | 84.06                                | 88.22                   | 89.42                  | 89.66                               | 89.9                              | 93.27                            | 97.12                    | 97.6                      | 100                      | 99.28              | 99.28              | 92.07                             | 92.07              | 92.07              | 90.87              | 91.35              | 91.37              | 91.35              | 90.87              | 90.87                    | 90.87              | 90.38              | 90.62   | 87.62                  | 90.38                   | 90.62                  | 90.87                | 90.87              | 90.38              |                    |
| 81.4                    | 85.02                      | 85.27                      | 85.27               | 84.54                             | 83.82                                | 87.98                   | 89.42                  | 89.66                               | 89.9                              | 93.03                            | 96.88                    | 97.36                     | 99.28                    | 100                | 99.04              | 91.83                             | 91.83              | 91.83              | 90.62              | 91.11              | 91.12              | 91.11              | 90.62              | 90.62                    | 90.62              | 90.14              | 90.38   | 90.62                  | 90.38                   | 90.14                  | 90.62                | 90.62              | 90.14              |                    |
| 82.13                   | 85.75                      | 85.99                      | 85.99               | 85.27                             | 84.54                                | 88.22                   | 89.18                  | 89.42                               | 89.66                             | 93.03                            | 96.88                    | 97.36                     | 99.28                    | 99.04              | 100                | 91.83                             | 91.83              | 91.83              | 90.62              | 91.11              | 91.62              | 91.11              | 90.62              | 90.62                    | 90.62              | 90.14              | 90.38   | 90.62                  | 90.62                   | 90.38                  | 90.62                | 84.09              | 90.38              |                    |
| 84.62                   | 87.26                      | 87.26                      | 87.02               | 86.54                             | 86.3                                 | 91.11                   | 91.59                  | 92.07                               | 92.07                             | 92.07                            | 92.79                    | 93.03                     | 92.07                    | 91.83              | 91.83              | 100                               | 98.8               | 98.8               | 97.61              | 97.37              | 97.73              | 97.61              | 97.13              | 97.13                    | 97.13              | 96.65              | 96.89   | 97.61                  | 97.37                   | 97.13                  | 97.61                | 97.13              | 97.13              |                    |
| 84.13                   | 87.5                       | 87.5                       | 87.26               | 86.78                             | 86.54                                | 91.59                   | 92.07                  | 92.07                               | 92.55                             | 92.07                            | 93.27                    | 93.27                     | 92.07                    | 91.83              | 91.83              | 98.8                              | 100                | 100                | 98.56              | 98.33              | 98.74              | 98.56              | 98.33              | 98.09                    | 98.09              | 97.61              | 97.85   | 98.56                  | 98.33                   | 98.33                  | 98.56                | 98.09              | 98.09              |                    |
| 84.13                   | 87.5                       | 87.5                       | 87.26               | 86.78                             | 86.54                                | 91.59                   | 92.07                  | 92.07                               | 92.55                             | 92.07                            | 93.27                    | 93.27                     | 92.07                    | 91.83              | 91.83              | 98.8                              | 100                | 100                | 98.56              | 98.33              | 98.74              | 98.56              | 98.33              | 98.09                    | 98.09              | 97.61              | 97.85   | 98.56                  | 98.33                   | 98.33                  | 98.56                | 98.09              | 98.09              |                    |

|           |           |           |           |           |           |           |           |           |           |           |           |           |           |           |           |           |           |           |           |           |           |           |           |           |           |           |           |           |           |           |           |           |           |           |
|-----------|-----------|-----------|-----------|-----------|-----------|-----------|-----------|-----------|-----------|-----------|-----------|-----------|-----------|-----------|-----------|-----------|-----------|-----------|-----------|-----------|-----------|-----------|-----------|-----------|-----------|-----------|-----------|-----------|-----------|-----------|-----------|-----------|-----------|-----------|
| 83.<br>41 | 86.<br>54 | 86.<br>54 | 86.<br>3  | 85.<br>82 | 85.<br>58 | 91.<br>11 | 91.<br>59 | 91.<br>59 | 92.<br>07 | 90.<br>87 | 91.<br>59 | 91.<br>83 | 90.<br>87 | 90.<br>62 | 90.<br>62 | 97.<br>61 | 98.<br>56 | 98.<br>56 | 10<br>0   | 99.<br>28 | 99.<br>75 | 99.<br>52 | 99.<br>52 | 98.<br>8  | 99.<br>04 | 99.<br>04 | 98.<br>56 | 98.<br>8  | 99.<br>52 | 99.<br>28 | 99.<br>04 | 99.<br>52 | 99.<br>04 | 99.<br>04 |
| 83.<br>41 | 86.<br>78 | 86.<br>78 | 86.<br>54 | 86.<br>06 | 85.<br>82 | 90.<br>87 | 91.<br>83 | 92.<br>07 | 92.<br>55 | 91.<br>11 | 92.<br>07 | 92.<br>31 | 91.<br>35 | 91.<br>11 | 91.<br>11 | 97.<br>37 | 98.<br>33 | 98.<br>33 | 99.<br>28 | 10<br>0   | 99.<br>75 | 99.<br>76 | 99.<br>28 | 98.<br>56 | 98.<br>8  | 98.<br>8  | 98.<br>33 | 98.<br>56 | 99.<br>28 | 99.<br>04 | 98.<br>56 | 99.<br>28 | 98.<br>8  | 98.<br>8  |
| 85.<br>28 | 87.<br>82 | 87.<br>82 | 87.<br>56 | 87.<br>31 | 86.<br>8  | 91.<br>62 | 92.<br>39 | 92.<br>39 | 92.<br>89 | 91.<br>37 | 92.<br>13 | 92.<br>39 | 91.<br>37 | 91.<br>12 | 91.<br>62 | 97.<br>73 | 98.<br>74 | 98.<br>74 | 99.<br>75 | 99.<br>75 | 10<br>0   | 10<br>0   | 99.<br>49 | 98.<br>74 | 98.<br>99 | 98.<br>99 | 98.<br>48 | 98.<br>74 | 99.<br>49 | 99.<br>49 | 99.<br>24 | 99.<br>75 | 99.<br>24 | 99.<br>24 |
| 83.<br>41 | 86.<br>78 | 86.<br>78 | 86.<br>54 | 86.<br>06 | 85.<br>82 | 91.<br>11 | 91.<br>59 | 91.<br>83 | 92.<br>31 | 91.<br>35 | 92.<br>07 | 92.<br>31 | 91.<br>35 | 91.<br>11 | 91.<br>11 | 97.<br>61 | 98.<br>56 | 98.<br>56 | 99.<br>52 | 99.<br>76 | 10<br>0   | 10<br>0   | 99.<br>52 | 98.<br>8  | 99.<br>04 | 99.<br>04 | 98.<br>56 | 98.<br>8  | 99.<br>52 | 99.<br>28 | 98.<br>8  | 99.<br>52 | 99.<br>04 | 99.<br>04 |
| 83.<br>17 | 86.<br>54 | 86.<br>54 | 86.<br>3  | 85.<br>82 | 85.<br>58 | 90.<br>87 | 91.<br>35 | 91.<br>35 | 91.<br>83 | 90.<br>87 | 91.<br>59 | 91.<br>83 | 90.<br>87 | 90.<br>62 | 90.<br>62 | 97.<br>61 | 98.<br>56 | 98.<br>56 | 99.<br>52 | 99.<br>28 | 99.<br>49 | 99.<br>52 | 10<br>0   | 98.<br>8  | 99.<br>04 | 99.<br>04 | 98.<br>56 | 98.<br>8  | 99.<br>52 | 99.<br>28 | 98.<br>8  | 99.<br>52 | 99.<br>04 | 99.<br>04 |
| 83.<br>41 | 87.<br>02 | 87.<br>02 | 86.<br>78 | 86.<br>3  | 86.<br>06 | 91.<br>11 | 90.<br>87 | 91.<br>35 | 91.<br>83 | 90.<br>87 | 92.<br>31 | 92.<br>07 | 90.<br>87 | 90.<br>62 | 90.<br>62 | 97.<br>13 | 98.<br>33 | 98.<br>33 | 98.<br>8  | 98.<br>56 | 98.<br>74 | 98.<br>8  | 98.<br>8  | 10<br>0   | 99.<br>76 | 99.<br>76 | 99.<br>28 | 99.<br>52 | 98.<br>8  | 98.<br>56 | 98.<br>56 | 98.<br>8  | 98.<br>33 | 98.<br>33 |
| 83.<br>41 | 87.<br>02 | 87.<br>02 | 86.<br>78 | 86.<br>3  | 86.<br>06 | 91.<br>11 | 90.<br>87 | 91.<br>35 | 91.<br>83 | 90.<br>87 | 92.<br>07 | 91.<br>83 | 90.<br>87 | 90.<br>62 | 90.<br>62 | 97.<br>13 | 98.<br>09 | 98.<br>09 | 99.<br>04 | 98.<br>8  | 98.<br>99 | 99.<br>04 | 99.<br>04 | 99.<br>76 | 10<br>0   | 10<br>0   | 99.<br>52 | 99.<br>76 | 99.<br>04 | 98.<br>8  | 98.<br>33 | 99.<br>04 | 98.<br>56 | 98.<br>56 |
| 83.<br>41 | 87.<br>02 | 87.<br>02 | 86.<br>78 | 86.<br>3  | 86.<br>06 | 91.<br>11 | 90.<br>87 | 91.<br>35 | 91.<br>83 | 90.<br>87 | 92.<br>07 | 91.<br>83 | 90.<br>87 | 90.<br>62 | 90.<br>62 | 97.<br>13 | 98.<br>09 | 98.<br>09 | 99.<br>04 | 98.<br>8  | 98.<br>99 | 99.<br>04 | 99.<br>04 | 99.<br>76 | 10<br>0   | 10<br>0   | 99.<br>52 | 99.<br>76 | 99.<br>04 | 98.<br>8  | 98.<br>33 | 99.<br>04 | 98.<br>56 | 98.<br>56 |
| 82.<br>93 | 86.<br>54 | 86.<br>54 | 86.<br>3  | 85.<br>82 | 85.<br>58 | 90.<br>62 | 90.<br>38 | 90.<br>87 | 91.<br>35 | 90.<br>38 | 91.<br>59 | 91.<br>35 | 90.<br>38 | 90.<br>14 | 90.<br>14 | 96.<br>65 | 97.<br>61 | 97.<br>61 | 98.<br>56 | 98.<br>33 | 98.<br>48 | 98.<br>56 | 98.<br>56 | 99.<br>28 | 99.<br>52 | 99.<br>52 | 10<br>0   | 99.<br>28 | 98.<br>56 | 98.<br>33 | 97.<br>85 | 98.<br>56 | 98.<br>09 | 98.<br>09 |
| 83.<br>17 | 87.<br>02 | 87.<br>02 | 86.<br>78 | 86.<br>3  | 86.<br>06 | 90.<br>87 | 90.<br>62 | 91.<br>11 | 91.<br>59 | 90.<br>62 | 91.<br>83 | 91.<br>59 | 90.<br>62 | 90.<br>38 | 90.<br>38 | 96.<br>89 | 97.<br>85 | 97.<br>85 | 98.<br>8  | 98.<br>56 | 98.<br>74 | 98.<br>8  | 98.<br>8  | 99.<br>52 | 99.<br>76 | 99.<br>76 | 99.<br>28 | 10<br>0   | 98.<br>8  | 98.<br>56 | 98.<br>09 | 98.<br>8  | 98.<br>33 | 98.<br>33 |
| 83.<br>41 | 86.<br>78 | 86.<br>78 | 86.<br>54 | 86.<br>06 | 85.<br>82 | 91.<br>11 | 91.<br>35 | 91.<br>35 | 91.<br>83 | 90.<br>87 | 91.<br>59 | 91.<br>83 | 90.<br>87 | 90.<br>62 | 90.<br>62 | 97.<br>61 | 98.<br>56 | 98.<br>56 | 99.<br>52 | 99.<br>28 | 99.<br>49 | 99.<br>52 | 99.<br>52 | 98.<br>8  | 99.<br>04 | 99.<br>04 | 98.<br>56 | 98.<br>8  | 10<br>0   | 99.<br>76 | 98.<br>8  | 99.<br>52 | 99.<br>04 | 99.<br>04 |
| 83.<br>41 | 86.<br>78 | 86.<br>78 | 86.<br>54 | 86.<br>06 | 85.<br>82 | 91.<br>11 | 91.<br>11 | 91.<br>11 | 91.<br>59 | 90.<br>62 | 91.<br>35 | 91.<br>59 | 90.<br>62 | 90.<br>38 | 90.<br>62 | 97.<br>37 | 98.<br>33 | 98.<br>33 | 99.<br>28 | 99.<br>04 | 99.<br>49 | 99.<br>28 | 99.<br>28 | 98.<br>56 | 98.<br>8  | 98.<br>8  | 98.<br>33 | 98.<br>56 | 99.<br>76 | 10<br>0   | 99.<br>04 | 99.<br>76 | 99.<br>28 | 99.<br>28 |
| 83.<br>17 | 86.<br>3  | 86.<br>3  | 86.<br>06 | 85.<br>58 | 85.<br>34 | 90.<br>87 | 91.<br>11 | 91.<br>11 | 91.<br>59 | 90.<br>38 | 91.<br>35 | 91.<br>59 | 90.<br>38 | 90.<br>14 | 90.<br>38 | 97.<br>13 | 98.<br>33 | 98.<br>33 | 99.<br>04 | 98.<br>56 | 99.<br>24 | 98.<br>8  | 98.<br>8  | 98.<br>56 | 98.<br>33 | 98.<br>33 | 97.<br>85 | 98.<br>09 | 98.<br>8  | 99.<br>04 | 10<br>0   | 99.<br>28 | 98.<br>8  | 99.<br>04 |
| 83.<br>41 | 86.<br>78 | 86.<br>78 | 86.<br>54 | 86.<br>06 | 85.<br>82 | 91.<br>11 | 91.<br>35 | 91.<br>35 | 91.<br>83 | 90.<br>87 | 91.<br>59 | 91.<br>83 | 90.<br>87 | 90.<br>62 | 90.<br>87 | 97.<br>61 | 98.<br>56 | 98.<br>56 | 99.<br>52 | 99.<br>28 | 99.<br>75 | 99.<br>52 | 99.<br>52 | 98.<br>8  | 99.<br>04 | 99.<br>04 | 98.<br>56 | 98.<br>8  | 99.<br>52 | 99.<br>76 | 99.<br>28 | 10<br>0   | 99.<br>52 | 99.<br>52 |
| 83.<br>65 | 87.<br>02 | 87.<br>02 | 86.<br>78 | 86.<br>3  | 86.<br>06 | 91.<br>11 | 91.<br>59 | 91.<br>59 | 92.<br>07 | 90.<br>87 | 91.<br>59 | 91.<br>83 | 90.<br>87 | 90.<br>62 | 84.<br>09 | 97.<br>13 | 98.<br>09 | 98.<br>09 | 99.<br>04 | 98.<br>8  | 99.<br>24 | 99.<br>04 | 99.<br>04 | 98.<br>33 | 98.<br>56 | 98.<br>56 | 98.<br>09 | 98.<br>33 | 99.<br>04 | 99.<br>28 | 98.<br>8  | 99.<br>52 | 10<br>0   | 99.<br>04 |
| 82.<br>93 | 86.<br>3  | 86.<br>3  | 86.<br>06 | 85.<br>58 | 85.<br>34 | 90.<br>62 | 90.<br>87 | 90.<br>87 | 91.<br>35 | 90.<br>38 | 91.<br>11 | 91.<br>35 | 90.<br>38 | 90.<br>14 | 90.<br>38 | 97.<br>13 | 98.<br>09 | 98.<br>09 | 99.<br>04 | 98.<br>8  | 99.<br>24 | 99.<br>04 | 99.<br>04 | 98.<br>33 | 98.<br>56 | 98.<br>56 | 98.<br>09 | 98.<br>33 | 99.<br>04 | 99.<br>28 | 99.<br>04 | 99.<br>52 | 99.<br>04 | 10<br>0   |

Table S13: Sequence identities (%) of CPS/KS and homologues.

| FSARC<br>_13126 | jgi.p_F<br>ustri1_<br>538881 | FDECE<br>_7075 | LCI18_<br>013895 | FNAPI<br>_4141 | FOIG_<br>09083 | FGLO<br>B1_618<br>6 | FPRO_<br>08705 | CPS/K<br>S(FFUJ<br>_14336) | FMAN<br>_08250 | FOYG_<br>08942 | FACUT<br>_8682 | FPRO_<br>16062 | FANT<br>H_6278 | FSUBG<br>_10000 | FMEXI<br>_710 | FDEN<br>T_1408<br>6 | FMUN<br>D_1569<br>7 | J7337_0<br>05030 | FPANT<br>_11050 |
|-----------------|------------------------------|----------------|------------------|----------------|----------------|---------------------|----------------|----------------------------|----------------|----------------|----------------|----------------|----------------|-----------------|---------------|---------------------|---------------------|------------------|-----------------|
| 100             | 54.24                        | 57.43          | 49.33            | 41.67          | 43.54          | 53.77               | 53.7           | 52.91                      | 52.28          | 52.7           | 52.54          | 52.54          | 54.07          | 53.62           | 53.33         | 52.28               | 52.7                | 52.12            | 53.02           |
| 54.24           | 100                          | 70.04          | 65.15            | 51.98          | 55.8           | 64.76               | 65.01          | 65.78                      | 65.89          | 65.89          | 65.64          | 66.17          | 66.63          | 65.31           | 64.83         | 65.36               | 66.31               | 65.85            | 65.15           |
| 57.43           | 70.04                        | 100            | 77.15            | 54.56          | 59.08          | 66.38               | 66.6           | 66.74                      | 66.53          | 66.53          | 66.6           | 65.33          | 66.63          | 65.22           | 65.26         | 65.58               | 66.63               | 66.63            | 66.53           |
| 49.33           | 65.15                        | 77.15          | 100              | 64.4           | 57.62          | 60.6                | 61.97          | 61.63                      | 61.43          | 63.57          | 62.14          | 61.75          | 63.18          | 60.85           | 61.05         | 61.43               | 62.21               | 59.88            | 60.85           |
| 41.67           | 51.98                        | 54.56          | 64.4             | 100            | 75.72          | 62.55               | 63.29          | 62.9                       | 63.1           | 63.29          | 65.28          | 64.09          | 62.9           | 60.97           | 61.51         | 66.27               | 65.87               | 67.66            | 68.25           |
| 43.54           | 55.8                         | 59.08          | 57.62            | 75.72          | 100            | 76.19               | 77.34          | 79.08                      | 78.43          | 80.83          | 78.38          | 78             | 78.43          | 75.82           | 76.91         | 78.87               | 79.74               | 77.56            | 78.65           |
| 53.77           | 64.76                        | 66.38          | 60.6             | 62.55          | 76.19          | 100                 | 96.9           | 85.55                      | 85.01          | 85.12          | 84.57          | 83.71          | 84.26          | 82.85           | 83.94         | 83.4                | 85.97               | 83.3             | 84.15           |
| 53.7            | 65.01                        | 66.6           | 61.97            | 63.29          | 77.34          | 96.9                | 100            | 85.61                      | 84.87          | 84.98          | 84.54          | 83.49          | 84.14          | 82.54           | 83.61         | 83.19               | 85.92               | 82.85            | 83.93           |
| 52.91           | 65.78                        | 66.74          | 61.63            | 62.9           | 79.08          | 85.55               | 85.61          | 100                        | 89.08          | 86.13          | 85.91          | 85.28          | 84.66          | 83.07           | 84.14         | 84.35               | 86.97               | 83.74            | 85.08           |
| 52.28           | 65.89                        | 66.53          | 61.43            | 63.1           | 78.43          | 85.01               | 84.87          | 89.08                      | 100            | 85.71          | 86.44          | 86.12          | 85.92          | 84.44           | 85.61         | 84.77               | 86.34               | 83.52            | 85.5            |
| 52.7            | 65.89                        | 66.53          | 63.57            | 63.29          | 80.83          | 85.12               | 84.98          | 86.13                      | 85.71          | 100            | 85.17          | 85.28          | 85.4           | 83.81           | 84.45         | 83.82               | 86.24               | 82.63            | 84.24           |
| 52.54           | 65.64                        | 66.6           | 62.14            | 65.28          | 78.38          | 84.57               | 84.54          | 85.91                      | 86.44          | 85.17          | 100            | 85.47          | 85.49          | 84.22           | 84.75         | 85.28               | 87.07               | 86.62            | 86.86           |
| 52.54           | 66.17                        | 65.33          | 61.75            | 64.09          | 78             | 83.71               | 83.49          | 85.28                      | 86.12          | 85.28          | 85.47          | 100            | 89.38          | 89.19           | 89.48         | 88.01               | 86.65               | 84.06            | 84.23           |
| 54.07           | 66.63                        | 66.63          | 63.18            | 62.9           | 78.43          | 84.26               | 84.14          | 84.66                      | 85.92          | 85.4           | 85.49          | 89.38          | 100            | 91.96           | 91.7          | 87.39               | 86.45               | 83.96            | 84.45           |
| 53.62           | 65.31                        | 65.22          | 60.85            | 60.97          | 75.82          | 82.85               | 82.54          | 83.07                      | 84.44          | 83.81          | 84.22          | 89.19          | 91.96          | 100             | 92.17         | 86.46               | 84.76               | 81.93            | 83.07           |
| 53.33           | 64.83                        | 65.26          | 61.05            | 61.51          | 76.91          | 83.94               | 83.61          | 84.14                      | 85.61          | 84.45          | 84.75          | 89.48          | 91.7           | 92.17           | 100           | 87.18               | 85.71               | 83.52            | 84.35           |
| 52.28           | 65.36                        | 65.58          | 61.43            | 66.27          | 78.87          | 83.4                | 83.19          | 84.35                      | 84.77          | 83.82          | 85.28          | 88.01          | 87.39          | 86.46           | 87.18         | 100                 | 88.55               | 84.97            | 86.03           |
| 52.7            | 66.31                        | 66.63          | 62.21            | 65.87          | 79.74          | 85.97               | 85.92          | 86.97                      | 86.34          | 86.24          | 87.07          | 86.65          | 86.45          | 84.76           | 85.71         | 88.55               | 100                 | 86.97            | 89.39           |
| 52.12           | 65.85                        | 66.63          | 59.88            | 67.66          | 77.56          | 83.3                | 82.85          | 83.74                      | 83.52          | 82.63          | 86.62          | 84.06          | 83.96          | 81.93           | 83.52         | 84.97               | 86.97               | 100              | 90.98           |
| 53.02           | 65.15                        | 66.53          | 60.85            | 68.25          | 78.65          | 84.15               | 83.93          | 85.08                      | 85.5           | 84.24          | 86.86          | 84.23          | 84.45          | 83.07           | 84.35         | 86.03               | 89.39               | 90.98            | 100             |

Table S14: Sequence identities (%) of DpfgB and homologues.

| DER45<br>DRAF<br>T_6180<br>20 | KAF25<br>_00342<br>3 | HG530<br>_01394<br>2 | FAVG<br>1_1269<br>8 | H9Q72<br>_00356<br>7 | H9Q73<br>_00381<br>7 | H9Q70<br>_01408<br>9 | TPAR_<br>03748 | XA68_<br>13016 | FNYG<br>_13150 | F53441<br>_8896 | FOMA<br>001_g1<br>8868 | LZL87<br>_01391<br>6 | DER46<br>DRAF<br>T_6903<br>67 | Forpe1<br>208_v0<br>11544 | FCUL<br>G_000<br>07167 | FPSE5<br>266_10<br>837 | MDCF<br>G8_L<br>OCUS<br>587785 | FPSE_<br>10837 | MDCF<br>G202_<br>LOCU<br>S51873<br>6 | FAUS<br>T_1142<br>1 | MDCF<br>U1_LO<br>CUS56<br>7934 | dpfgB<br>_FGS<br>G_122<br>22_<br>17.1 | FGRA<br>MCM<br>L3066_<br>01t157<br>17.1 | MDCF<br>G5_L<br>OCUS<br>178956 | FGRA<br>MPH1<br>_01T15<br>659 | NXS19<br>_00800<br>5 |
|-------------------------------|----------------------|----------------------|---------------------|----------------------|----------------------|----------------------|----------------|----------------|----------------|-----------------|------------------------|----------------------|-------------------------------|---------------------------|------------------------|------------------------|--------------------------------|----------------|--------------------------------------|---------------------|--------------------------------|---------------------------------------|-----------------------------------------|--------------------------------|-------------------------------|----------------------|
| 100                           | 98.34                | 98.76                | 98.35               | 91.32                | 91.86                | 90.78                | 80.58          | 76.57          | 90.4           | 87.19           | 93.14                  | 90.99                | 92.61                         | 93.04                     | 91.21                  | 91.63                  | 91.21                          | 88.78          | 91.21                                | 91.21               | 91.21                          | 92.35                                 | 90.79                                   | 90.38                          | 91.56                         | 65.35                |
| 98.34                         | 100                  | 99.17                | 98.76               | 92.12                | 93.02                | 91.71                | 81.74          | 76.99          | 90.96          | 88.38           | 94.29                  | 92.24                | 93.48                         | 93.91                     | 90.04                  | 90.46                  | 90.46                          | 87.98          | 90.46                                | 90.46               | 90.46                          | 91.33                                 | 90.04                                   | 89.63                          | 90.79                         | 64.22                |
| 98.76                         | 99.17                | 100                  | 99.59               | 92.15                | 93.02                | 91.75                | 80.99          | 76.57          | 90.96          | 88.02           | 94.29                  | 91.85                | 93.48                         | 93.91                     | 91.21                  | 91.63                  | 91.21                          | 88.78          | 91.21                                | 91.21               | 91.21                          | 92.35                                 | 90.79                                   | 90.38                          | 91.56                         | 65.35                |
| 98.35                         | 98.76                | 99.59                | 100                 | 92.15                | 93.02                | 91.75                | 80.99          | 76.57          | 90.96          | 88.02           | 93.71                  | 91.42                | 93.04                         | 93.48                     | 91.21                  | 91.63                  | 91.21                          | 88.78          | 91.21                                | 91.21               | 91.21                          | 92.35                                 | 90.79                                   | 90.38                          | 91.56                         | 65.35                |
| 91.32                         | 92.12                | 92.15                | 92.15               | 100                  | 99.42                | 99.51                | 80.58          | 75.73          | 89.27          | 84.3            | 91.43                  | 88.41                | 90                            | 89.57                     | 89.54                  | 89.96                  | 89.96                          | 86.83          | 89.96                                | 89.96               | 89.96                          | 91.18                                 | 89.54                                   | 89.12                          | 89.33                         | 63.6                 |
| 91.86                         | 93.02                | 93.02                | 93.02               | 99.42                | 100                  | 100                  | 81.4           | 78.49          | 90.7           | 90.7            | 91.86                  | 91.86                | 91.86                         | 91.86                     | 90                     | 90.59                  | 90.59                          | 89.12          | 90.59                                | 90.59               | 90.59                          | 90.59                                 | 90.59                                   | 90                             | 90.59                         | 80.81                |
| 90.78                         | 91.71                | 91.75                | 91.75               | 99.51                | 100                  | 100                  | 79.61          | 72.41          | 86.52          | 81.55           | 90.65                  | 87.31                | 89.18                         | 88.66                     | 87.86                  | 88.35                  | 88.35                          | 84.3           | 88.35                                | 88.35               | 88.35                          | 89.05                                 | 87.86                                   | 87.38                          | 87.5                          | 65.62                |
| 80.58                         | 81.74                | 80.99                | 80.99               | 80.58                | 81.4                 | 79.61                | 100            | 77.82          | 77.97          | 77.37           | 80.57                  | 78.63                | 80.43                         | 80.43                     | 82.01                  | 82.43                  | 82.85                          | 80.98          | 82.85                                | 82.85               | 82.85                          | 81.76                                 | 82.43                                   | 82.43                          | 82.67                         | 58.77                |
| 76.57                         | 76.99                | 76.57                | 76.57               | 75.73                | 78.49                | 72.41                | 77.82          | 100            | 75.71          | 74.48           | 76.57                  | 75.22                | 75.65                         | 76.09                     | 77.54                  | 77.54                  | 77.54                          | 76.59          | 77.54                                | 77.54               | 77.54                          | 78.82                                 | 77.54                                   | 77.12                          | 78.22                         | 57.02                |
| 90.4                          | 90.96                | 90.96                | 90.96               | 89.27                | 90.7                 | 86.52                | 77.97          | 75.71          | 100            | 92.09           | 93.71                  | 91.53                | 91.53                         | 91.53                     | 88.51                  | 90.23                  | 90.23                          | 88.08          | 90.23                                | 90.23               | 90.23                          | 92.35                                 | 90.23                                   | 90.23                          | 90.23                         | 81.36                |
| 87.19                         | 88.38                | 88.02                | 88.02               | 84.3                 | 90.7                 | 81.55                | 77.37          | 74.48          | 92.09          | 100             | 93.71                  | 91.14                | 88.02                         | 88.43                     | 85.77                  | 87.03                  | 87.03                          | 89.76          | 87.03                                | 87.03               | 87.03                          | 92.94                                 | 86.61                                   | 86.19                          | 92.44                         | 66.23                |
| 93.14                         | 94.29                | 94.29                | 93.71               | 91.43                | 91.86                | 90.65                | 80.57          | 76.57          | 93.71          | 93.71           | 100                    | 98.86                | 98.86                         | 98.86                     | 93.02                  | 94.77                  | 94.77                          | 93.29          | 94.77                                | 94.77               | 94.77                          | 95.88                                 | 94.77                                   | 94.19                          | 94.77                         | 85.14                |
| 90.99                         | 92.24                | 91.85                | 91.42               | 88.41                | 91.86                | 87.31                | 78.63          | 75.22          | 91.53          | 91.14           | 98.86                  | 100                  | 93.39                         | 92.98                     | 90                     | 91.3                   | 91.3                           | 93.97          | 91.3                                 | 91.3                | 91.3                           | 95.88                                 | 90.87                                   | 90.43                          | 94.14                         | 69.82                |
| 92.61                         | 93.48                | 93.48                | 93.04               | 90                   | 91.86                | 89.18                | 80.43          | 75.65          | 91.53          | 88.02           | 98.86                  | 93.39                | 100                           | 99.17                     | 92.07                  | 93.39                  | 93.39                          | 93.47          | 93.39                                | 93.39               | 93.39                          | 95.88                                 | 92.95                                   | 92.51                          | 94.59                         | 69.82                |
| 93.04                         | 93.91                | 93.91                | 93.48               | 89.57                | 91.86                | 88.66                | 80.43          | 76.09          | 91.53          | 88.43           | 98.86                  | 92.98                | 99.17                         | 100                       | 92.51                  | 93.83                  | 93.83                          | 93.97          | 93.83                                | 93.83               | 93.83                          | 95.88                                 | 93.39                                   | 92.95                          | 95.05                         | 69.82                |
| 91.21                         | 90.04                | 91.21                | 91.21               | 89.54                | 90                   | 87.86                | 82.01          | 77.54          | 88.51          | 85.77           | 93.02                  | 90                   | 92.07                         | 92.51                     | 100                    | 98.76                  | 98.35                          | 94.71          | 98.35                                | 98.35               | 98.35                          | 98.27                                 | 97.93                                   | 97.52                          | 96.93                         | 70.18                |
| 91.63                         | 90.46                | 91.63                | 91.63               | 89.96                | 90.59                | 88.35                | 82.43          | 77.54          | 90.23          | 87.03           | 94.77                  | 91.3                 | 93.39                         | 93.83                     | 98.76                  | 100                    | 99.59                          | 96.15          | 99.59                                | 99.59               | 99.59                          | 100                                   | 99.17                                   | 98.76                          | 98.25                         | 71.49                |
| 91.21                         | 90.46                | 91.21                | 91.21               | 89.96                | 90.59                | 88.35                | 82.85          | 77.54          | 90.23          | 87.03           | 94.77                  | 91.3                 | 93.39                         | 93.83                     | 98.35                  | 99.59                  | 100                            | 96.15          | 99.81                                | 100                 | 99.63                          | 100                                   | 99.44                                   | 99.26                          | 98.86                         | 71.49                |
| 88.78                         | 87.98                | 88.78                | 88.78               | 86.83                | 89.12                | 84.3                 | 80.98          | 76.59          | 88.08          | 89.76           | 93.29                  | 93.97                | 93.47                         | 93.97                     | 94.71                  | 96.15                  | 96.15                          | 100            | 96.15                                | 96.15               | 96.15                          | 99.33                                 | 95.67                                   | 95.19                          | 97.07                         | 68.29                |
| 91.21                         | 90.46                | 91.21                | 91.21               | 89.96                | 90.59                | 88.35                | 82.85          | 77.54          | 90.23          | 87.03           | 94.77                  | 91.3                 | 93.39                         | 93.83                     | 98.35                  | 99.59                  | 99.81                          | 96.15          | 100                                  | 100                 | 99.9                           | 100                                   | 99.63                                   | 97.86                          | 99.05                         | 71.49                |
| 91.21                         | 90.46                | 91.21                | 91.21               | 89.96                | 90.59                | 88.35                | 82.85          | 77.54          | 90.23          | 87.03           | 94.77                  | 91.3                 | 93.39                         | 93.83                     | 98.35                  | 99.59                  | 100                            | 96.15          | 100                                  | 100                 | 100                            | 100                                   | 99.59                                   | 99.17                          | 98.25                         | 71.49                |
| 91.21                         | 90.46                | 91.21                | 91.21               | 89.96                | 90.59                | 88.35                | 82.85          | 77.54          | 90.23          | 87.03           | 94.77                  | 91.3                 | 93.39                         | 93.83                     | 98.35                  | 99.59                  | 99.63                          | 96.15          | 99.9                                 | 100                 | 100                            | 100                                   | 99.81                                   | 97.97                          | 99.24                         | 71.49                |
| 92.35                         | 91.33                | 92.35                | 92.35               | 91.18                | 90.59                | 89.05                | 81.76          | 78.82          | 92.35          | 92.94           | 95.88                  | 95.88                | 95.88                         | 95.88                     | 98.27                  | 100                    | 100                            | 99.33          | 100                                  | 100                 | 100                            | 100                                   | 100                                     | 99.42                          | 100                           | 90.75                |
| 90.79                         | 90.04                | 90.79                | 90.79               | 89.54                | 90.59                | 87.86                | 82.43          | 77.54          | 90.23          | 86.61           | 94.77                  | 90.87                | 92.95                         | 93.39                     | 97.93                  | 99.17                  | 99.44                          | 95.67          | 99.63                                | 99.59               | 99.81                          | 100                                   | 100                                     | 99.44                          | 99.05                         | 71.49                |
| 90.38                         | 89.63                | 90.38                | 90.38               | 89.12                | 90                   | 87.38                | 82.43          | 77.12          | 90.23          | 86.19           | 94.19                  | 90.43                | 92.51                         | 92.95                     | 97.52                  | 98.76                  | 99.26                          | 95.19          | 97.86                                | 99.17               | 97.97                          | 99.42                                 | 99.44                                   | 100                            | 99.24                         | 71.05                |
| 91.56                         | 90.79                | 91.56                | 91.56               | 89.33                | 90.59                | 87.5                 | 82.67          | 78.22          | 90.23          | 92.44           | 94.77                  | 94.14                | 94.59                         | 95.05                     | 96.93                  | 98.25                  | 98.86                          | 97.07          | 99.05                                | 98.25               | 99.24                          | 100                                   | 99.05                                   | 99.24                          | 100                           | 72.44                |
| 65.35                         | 64.22                | 65.35                | 65.35               | 63.6                 | 80.81                | 65.62                | 58.77          | 57.02          | 81.36          | 66.23           | 85.14                  | 69.82                | 69.82                         | 69.82                     | 70.18                  | 71.49                  | 71.49                          | 68.29          | 71.49                                | 71.49               | 71.49                          | 90.75                                 | 71.49                                   | 71.05                          | 72.44                         | 100                  |

Table S15: Sequence identities (%) of FgMS, FoFs and homologues.

| <b>FgMS</b> | <b>FGSG_01738</b> | <b>FoFs</b> | <b>FGRMN_7913</b> | <b>FPCIR_12113</b> | <b>FPANT_13888</b> |
|-------------|-------------------|-------------|-------------------|--------------------|--------------------|
| 100         | 98.65             | 32.23       | 29.12             | 29.35              | 29.59              |
| 98.65       | 100               | 31.25       | 27.39             | 27.87              | 28.25              |
| 32.23       | 31.25             | 100         | 28.78             | 28.8               | 29.67              |
| 29.12       | 27.39             | 28.78       | 100               | 79.33              | 80.05              |
| 29.35       | 27.87             | 28.8        | 79.33             | 100                | 96.94              |
| 29.59       | 28.25             | 29.67       | 80.05             | 96.94              | 100                |

Table S16: Sequence identities (%) of ERG7 and homologues.

| ERG7(<br>A0A0E0<br>SP71) | LCI18_<br>004508 | NECH<br>ADRAF<br>T_72055 | B0J15D<br>RAFT_<br>490730 | NCS57_<br>0116210<br>0 | B0J15D<br>RAFT_<br>467131 | NCS54_<br>0141840<br>0 | NCS57_<br>0140030<br>0 | FDECE<br>_3328 | BKA59<br>DRAFT<br>_535453 | FSARC<br>_2617 |
|--------------------------|------------------|--------------------------|---------------------------|------------------------|---------------------------|------------------------|------------------------|----------------|---------------------------|----------------|
| 100                      | 80.45            | 80.1                     | 80.45                     | 80.08                  | 56.64                     | 56.58                  | 56.72                  | 58.39          | 49.68                     | 58.59          |
| 80.45                    | 100              | 98.04                    | 98.82                     | 97.91                  | 58.13                     | 58.89                  | 59.02                  | 60.85          | 52.44                     | 59.95          |
| 80.1                     | 98.04            | 100                      | 98.3                      | 97.65                  | 57.72                     | 58.48                  | 58.62                  | 60.44          | 51.94                     | 59.81          |
| 80.45                    | 98.82            | 98.3                     | 100                       | 98.43                  | 57.86                     | 58.62                  | 58.75                  | 60.85          | 52.6                      | 60.22          |
| 80.08                    | 97.91            | 97.65                    | 98.43                     | 100                    | 57.99                     | 58.75                  | 58.89                  | 60.71          | 52.44                     | 60.08          |
| 56.64                    | 58.13            | 57.72                    | 57.86                     | 57.99                  | 100                       | 96.34                  | 96.75                  | 74.52          | 59.15                     | 71.45          |
| 56.58                    | 58.89            | 58.48                    | 58.62                     | 58.75                  | 96.34                     | 100                    | 98.37                  | 75.72          | 59.08                     | 71.27          |
| 56.72                    | 59.02            | 58.62                    | 58.75                     | 58.89                  | 96.75                     | 98.37                  | 100                    | 75.85          | 59.57                     | 71.68          |
| 58.39                    | 60.85            | 60.44                    | 60.85                     | 60.71                  | 74.52                     | 75.72                  | 75.85                  | 100            | 63.59                     | 77.66          |
| 49.68                    | 52.44            | 51.94                    | 52.6                      | 52.44                  | 59.15                     | 59.08                  | 59.57                  | 63.59          | 100                       | 68.35          |
| 58.59                    | 59.95            | 59.81                    | 60.22                     | 60.08                  | 71.45                     | 71.27                  | 71.68                  | 77.66          | 68.35                     | 100            |



Table S17: Sequence identities (%) of CarRA and homologues.

| BAKA5<br>5DRA<br>FT_65<br>2263 | FOYG<br>_15802 | FOIG<br>_10085 | FNAP<br>I_9157 | J7337_<br>013307 | FVEG<br>_10718 | FMU<br>ND_1<br>581 | FPAN<br>T_457<br>7 | FPCIR<br>_12421 | FDEN<br>T_702<br>0 | FACU<br>T_109<br>5 | FPRO<br>_15512 | FGLO<br>B1_67<br>42 | carRA<br>(FFUJ<br>_11802<br>) | FMA<br>N_149<br>45 | FMEX<br>I_3381 | FSUB<br>G_785<br>0 | FANT<br>H_697<br>1 |
|--------------------------------|----------------|----------------|----------------|------------------|----------------|--------------------|--------------------|-----------------|--------------------|--------------------|----------------|---------------------|-------------------------------|--------------------|----------------|--------------------|--------------------|
| 100                            | 96.72          | 97.59          | 95.69          | 95.69            | 95.69          | 94.66              | 96.38              | 96.03           | 93.45              | 95.69              | 95.17          | 94.48               | 95.52                         | 94.83              | 95.17          | 95.17              | 94.07              |
| 96.72                          | 100            | 98.79          | 96.38          | 96.03            | 96.03          | 95.34              | 96.72              | 96.03           | 93.79              | 96.72              | 96.55          | 95.86               | 96.9                          | 96.21              | 96.55          | 96.21              | 95.56              |
| 97.59                          | 98.79          | 100            | 97.24          | 96.9             | 96.9           | 95.86              | 97.59              | 96.9            | 94.83              | 97.24              | 97.07          | 96.38               | 97.41                         | 96.72              | 97.07          | 96.72              | 95.74              |
| 95.69                          | 96.38          | 97.24          | 100            | 97.93            | 97.93          | 97.24              | 98.62              | 97.93           | 95.69              | 97.93              | 97.41          | 97.07               | 98.1                          | 97.76              | 98.45          | 97.76              | 97.04              |
| 95.69                          | 96.03          | 96.9           | 97.93          | 100              | 99.14          | 97.24              | 98.62              | 97.93           | 95.17              | 98.1               | 97.07          | 96.72               | 97.76                         | 97.07              | 97.41          | 97.41              | 96.48              |
| 95.69                          | 96.03          | 96.9           | 97.93          | 99.14            | 100            | 96.72              | 98.45              | 97.76           | 95                 | 97.93              | 96.9           | 96.55               | 97.59                         | 97.07              | 97.41          | 97.24              | 96.48              |
| 94.66                          | 95.34          | 95.86          | 97.24          | 97.24            | 96.72          | 100                | 98.28              | 97.24           | 94.83              | 97.41              | 96.38          | 96.38               | 97.07                         | 96.72              | 97.07          | 97.41              | 96.48              |
| 96.38                          | 96.72          | 97.59          | 98.62          | 98.62            | 98.45          | 98.28              | 100                | 98.97           | 96.21              | 98.79              | 97.76          | 97.41               | 98.45                         | 97.76              | 98.1           | 98.45              | 97.59              |
| 96.03                          | 96.03          | 96.9           | 97.93          | 97.93            | 97.76          | 97.24              | 98.97              | 100             | 96.03              | 98.28              | 97.59          | 97.24               | 98.28                         | 97.59              | 97.93          | 98.28              | 97.41              |
| 93.45                          | 93.79          | 94.83          | 95.69          | 95.17            | 95             | 94.83              | 96.21              | 96.03           | 100                | 95.52              | 95.17          | 94.48               | 95.52                         | 95.17              | 95.52          | 95.69              | 94.63              |
| 95.69                          | 96.72          | 97.24          | 97.93          | 98.1             | 97.93          | 97.41              | 98.79              | 98.28           | 95.52              | 100                | 98.1           | 97.76               | 98.79                         | 98.1               | 98.45          | 98.45              | 97.59              |
| 95.17                          | 96.55          | 97.07          | 97.41          | 97.07            | 96.9           | 96.38              | 97.76              | 97.59           | 95.17              | 98.1               | 100            | 98.79               | 98.45                         | 97.76              | 98.1           | 97.76              | 96.85              |
| 94.48                          | 95.86          | 96.38          | 97.07          | 96.72            | 96.55          | 96.38              | 97.41              | 97.24           | 94.48              | 97.76              | 98.79          | 100                 | 98.1                          | 97.41              | 98.1           | 97.76              | 96.85              |
| 95.52                          | 96.9           | 97.41          | 98.1           | 97.76            | 97.59          | 97.07              | 98.45              | 98.28           | 95.52              | 98.79              | 98.45          | 98.1                | 100                           | 98.45              | 98.79          | 98.45              | 97.59              |
| 94.83                          | 96.21          | 96.72          | 97.76          | 97.07            | 97.07          | 96.72              | 97.76              | 97.59           | 95.17              | 98.1               | 97.76          | 97.41               | 98.45                         | 100                | 98.97          | 98.62              | 97.59              |
| 95.17                          | 96.55          | 97.07          | 98.45          | 97.41            | 97.41          | 97.07              | 98.1               | 97.93           | 95.52              | 98.45              | 98.1           | 98.1                | 98.79                         | 98.97              | 100            | 99.31              | 98.15              |
| 95.17                          | 96.21          | 96.72          | 97.76          | 97.41            | 97.24          | 97.41              | 98.45              | 98.28           | 95.69              | 98.45              | 97.76          | 97.76               | 98.45                         | 98.62              | 99.31          | 100                | 98.7               |
| 94.07                          | 95.56          | 95.74          | 97.04          | 96.48            | 96.48          | 96.48              | 97.59              | 97.41           | 94.63              | 97.59              | 96.85          | 96.85               | 97.59                         | 97.59              | 98.15          | 98.7               | 100                |

Table S18: Sequence identities (%) of DMATS1 and homologues.

| FDECE<br>_2611 | BKA55<br>DRAFT<br>_596100 | FOIG_1<br>5822 | FOYG_<br>12928 | FGLOB<br>1_12591 | DMAT<br>S1(FFU<br>J_09179<br>) | FACUT<br>_4333 | FMEXI<br>_13958 | FSUBG<br>_13334 | FANTH<br>_2382 | FMUN<br>D_7075 | FNAPI<br>_658 | FPANT<br>_11676 | FDENT<br>_259 | J7337_0<br>11243 | FVEG_<br>09966 |
|----------------|---------------------------|----------------|----------------|------------------|--------------------------------|----------------|-----------------|-----------------|----------------|----------------|---------------|-----------------|---------------|------------------|----------------|
| 100            | 65.66                     | 67.93          | 67.7           | 64.45            | 66.67                          | 64.85          | 65.64           | 65.88           | 65.94          | 65.88          | 65.17         | 65.88           | 65.64         | 65               | 65.94          |
| 65.66          | 100                       | 78.61          | 77.11          | 73.32            | 74.31                          | 73.07          | 72.07           | 73.07           | 74.06          | 75.12          | 74.13         | 72.89           | 73.88         | 79.39            | 74.38          |
| 67.93          | 78.61                     | 100            | 92.74          | 86.38            | 86.36                          | 84.94          | 83.33           | 84.04           | 84.93          | 88.29          | 84.07         | 82.9            | 85.95         | 86.67            | 85.2           |
| 67.7           | 77.11                     | 92.74          | 100            | 83.8             | 87.08                          | 85.88          | 83.8            | 84.27           | 85.17          | 88.06          | 84.78         | 84.07           | 86.18         | 84.93            | 85.68          |
| 64.45          | 73.32                     | 86.38          | 83.8           | 100              | 91.17                          | 82.39          | 80.33           | 81.5            | 82.34          | 84.31          | 81.03         | 80.56           | 81.97         | 85.22            | 83.53          |
| 66.67          | 74.31                     | 86.36          | 87.08          | 91.17            | 100                            | 86.87          | 83.05           | 83.53           | 84.25          | 87.59          | 84.96         | 84.25           | 85.44         | 86.09            | 86.16          |
| 64.85          | 73.07                     | 84.94          | 85.88          | 82.39            | 86.87                          | 100            | 84.04           | 84.74           | 85.68          | 87.79          | 86.15         | 84.51           | 86.62         | 84.64            | 86.16          |
| 65.64          | 72.07                     | 83.33          | 83.8           | 80.33            | 83.05                          | 84.04          | 100             | 94.38           | 95.7           | 86.18          | 82.44         | 82.2            | 83.61         | 82.32            | 83.29          |
| 65.88          | 73.07                     | 84.04          | 84.27          | 81.5             | 83.53                          | 84.74          | 94.38           | 100             | 96.42          | 86.89          | 83.37         | 82.67           | 83.84         | 84.06            | 83.77          |
| 65.94          | 74.06                     | 84.93          | 85.17          | 82.34            | 84.25                          | 85.68          | 95.7            | 96.42           | 100            | 86.87          | 83.77         | 83.77           | 84.25         | 84.06            | 84.01          |
| 65.88          | 75.12                     | 88.29          | 88.06          | 84.31            | 87.59                          | 87.79          | 86.18           | 86.89           | 86.87          | 100            | 89.98         | 89.04           | 91.38         | 91.07            | 90.97          |
| 65.17          | 74.13                     | 84.07          | 84.78          | 81.03            | 84.96                          | 86.15          | 82.44           | 83.37           | 83.77          | 89.98          | 100           | 93.71           | 91.61         | 89.63            | 90.5           |
| 65.88          | 72.89                     | 82.9           | 84.07          | 80.56            | 84.25                          | 84.51          | 82.2            | 82.67           | 83.77          | 89.04          | 93.71         | 100             | 89.98         | 88.18            | 89.31          |
| 65.64          | 73.88                     | 85.95          | 86.18          | 81.97            | 85.44                          | 86.62          | 83.61           | 83.84           | 84.25          | 91.38          | 91.61         | 89.98           | 100           | 92.22            | 93.59          |
| 65             | 79.39                     | 86.67          | 84.93          | 85.22            | 86.09                          | 84.64          | 82.32           | 84.06           | 84.06          | 91.07          | 89.63         | 88.18           | 92.22         | 100              | 98.56          |
| 65.94          | 74.38                     | 85.2           | 85.68          | 83.53            | 86.16                          | 86.16          | 83.29           | 83.77           | 84.01          | 90.97          | 90.5          | 89.31           | 93.59         | 98.56            | 100            |

Table S19: Sequence identities (%) of BEA1 and homologues.

| FVR<br>RES_<br>12556 | FPO<br>AC1_<br>01150<br>0 | BKA<br>55DR<br>AFT_<br>67790<br>2 | FOY<br>G_12<br>900 | FOIG<br>_1579<br>3 | FMA<br>N_12<br>971 | FGL<br>OB1_<br>2217 | BEA1<br>(FFUJ<br>_0929<br>6) | FPR<br>O_13<br>541 | FAC<br>UT_8<br>369 | J7337<br>_0112<br>63 | FVE<br>G_16<br>703 | FPCI<br>R_12<br>112 | FDE<br>NT_2<br>45 | FMU<br>ND_<br>5269 | FAN<br>TH_2<br>399 | FME<br>XI_40<br>09 | FSUB<br>G_13<br>646 |
|----------------------|---------------------------|-----------------------------------|--------------------|--------------------|--------------------|---------------------|------------------------------|--------------------|--------------------|----------------------|--------------------|---------------------|-------------------|--------------------|--------------------|--------------------|---------------------|
| 100                  | 89.93                     | 66.16                             | 66.00              | 66.04              | 65.60              | 65.6                | 65.22                        | 65.41              | 65.49              | 56.19                | 67                 | 65.36               | 65.21             | 65.44              | 65.41              | 65.4               | 65.65               |
| 89.93                | 100                       | 66.45                             | 66.55              | 66.4               | 66.09              | 66.18               | 65.84                        | 65.79              | 66.01              | 56.28                | 67.77              | 66.01               | 65.82             | 66.05              | 65.76              | 65.91              | 65.88               |
| 66.16                | 66.45                     | 100                               | 91.07              | 91.39              | 88.55              | 88.68               | 89.05                        | 88.39              | 90.01              | 70.79                | 89.19              | 89.26               | 89.84             | 90.08              | 89.3               | 89.09              | 88.82               |
| 66.00                | 66.55                     | 91.07                             | 100                | 97.55              | 90.18              | 90.49               | 90.62                        | 90.33              | 91.80              | 72.70                | 90.45              | 90.53               | 91.15             | 91.61              | 90.55              | 90.87              | 90.15               |
| 66.04                | 66.40                     | 91.39                             | 97.55              | 100                | 90.47              | 90.66               | 90.78                        | 90.59              | 92.38              | 73.14                | 90.95              | 90.79               | 91.35             | 92                 | 90.87              | 90.88              | 90.45               |
| 65.60                | 66.09                     | 88.55                             | 90.18              | 90.47              | 100                | 95.09               | 94.83                        | 94.64              | 90.52              | 70.9                 | 90.05              | 89.45               | 89.64             | 90.11              | 89.05              | 88.96              | 88.27               |
| 65.60                | 66.18                     | 88.68                             | 90.49              | 90.66              | 95.09              | 100                 | 95.09                        | 95.76              | 90.42              | 70.07                | 89.95              | 89.13               | 89.48             | 89.85              | 89.12              | 89.06              | 88.6                |
| 65.22                | 65.84                     | 89.05                             | 90.62              | 90.78              | 94.83              | 95.09               | 100                          | 95.76              | 90.9               | 70.94                | 90.22              | 89.25               | 89.86             | 90.23              | 89.3               | 89.47              | 88.78               |
| 65.41                | 65.79                     | 88.39                             | 90.33              | 90.59              | 94.64              | 95.76               | 95.76                        | 100                | 90.33              | 70.07                | 90.09              | 88.9                | 89.26             | 89.79              | 88.99              | 88.8               | 88.34               |
| 65.49                | 66.01                     | 90.01                             | 91.80              | 92.38              | 90.52              | 90.42               | 90.9                         | 90.33              | 100                | 72.03                | 91.35              | 91.13               | 91.73             | 91.99              | 90.8               | 90.52              | 90.12               |
| 56.19                | 56.28                     | 70.79                             | 72.70              | 73.14              | 70.9               | 70.07               | 70.94                        | 70.07              | 72.03              | 100                  | 97.68              | 73.72               | 74.06             | 71.88              | 69.88              | 71.36              | 70.69               |
| 67.00                | 67.77                     | 89.19                             | 90.45              | 90.95              | 90.05              | 89.95               | 90.22                        | 90.09              | 91.35              | 97.68                | 100                | 92.07               | 92.56             | 90.9               | 89.5               | 89.73              | 89.46               |
| 65.36                | 66.01                     | 89.26                             | 90.53              | 90.79              | 89.45              | 89.13               | 89.25                        | 88.9               | 91.13              | 73.72                | 92.07              | 100                 | 95.19             | 90.94              | 90.01              | 89.89              | 89.67               |
| 65.21                | 65.82                     | 89.84                             | 91.15              | 91.35              | 89.64              | 89.48               | 89.86                        | 89.26              | 91.73              | 74.06                | 92.56              | 95.19               | 100               | 91.54              | 90.53              | 90.19              | 89.94               |
| 65.44                | 66.05                     | 90.08                             | 91.61              | 92.00              | 90.11              | 89.85               | 90.23                        | 89.79              | 91.99              | 71.88                | 90.9               | 90.94               | 91.54             | 100                | 90.87              | 90.78              | 90.55               |
| 65.41                | 65.76                     | 89.30                             | 90.55              | 90.87              | 89.05              | 89.12               | 89.3                         | 88.99              | 90.8               | 69.88                | 89.5               | 90.01               | 90.53             | 90.87              | 100                | 93.9               | 93.47               |
| 65.40                | 65.91                     | 89.09                             | 90.87              | 90.88              | 88.96              | 89.06               | 89.47                        | 88.8               | 90.52              | 71.36                | 89.73              | 89.89               | 90.19             | 90.78              | 93.9               | 100                | 93.73               |
| 65.65                | 65.88                     | 88.82                             | 90.15              | 90.45              | 88.27              | 88.6                | 88.78                        | 88.34              | 90.12              | 70.69                | 89.46              | 89.67               | 89.94             | 90.55              | 93.47              | 93.73              | 100                 |

## Supplementary Figures.

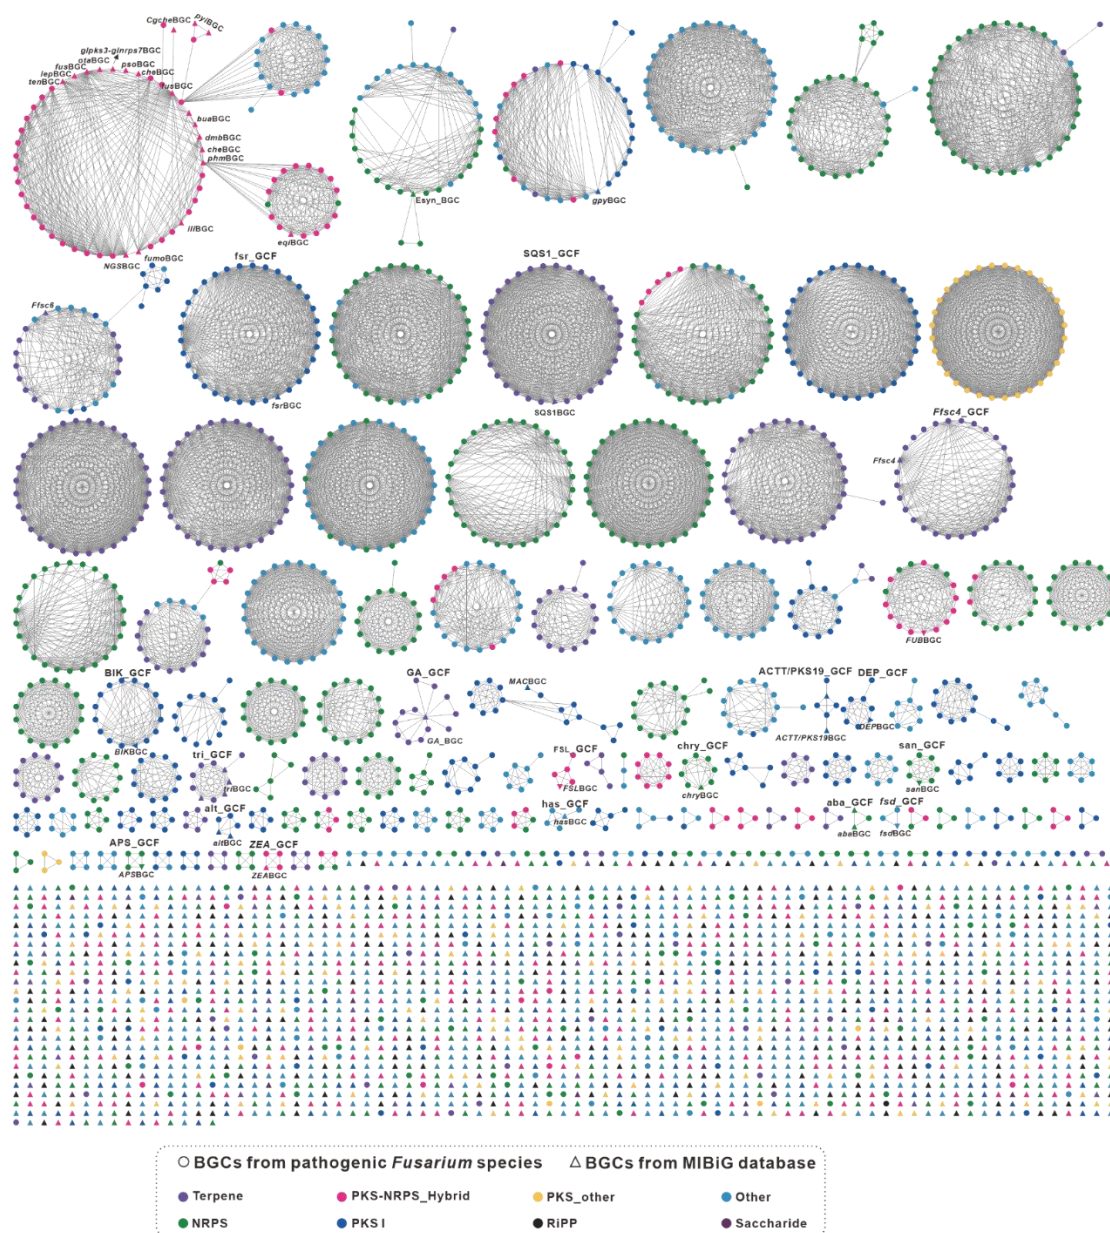

Figure S1: GCF network of 1733 predicted biosynthetic gene cluster (BGC) from 35 pathogenic *Fusarium* species caculated by BiG-SCAPE pipeline and visualised with Cytoscape.

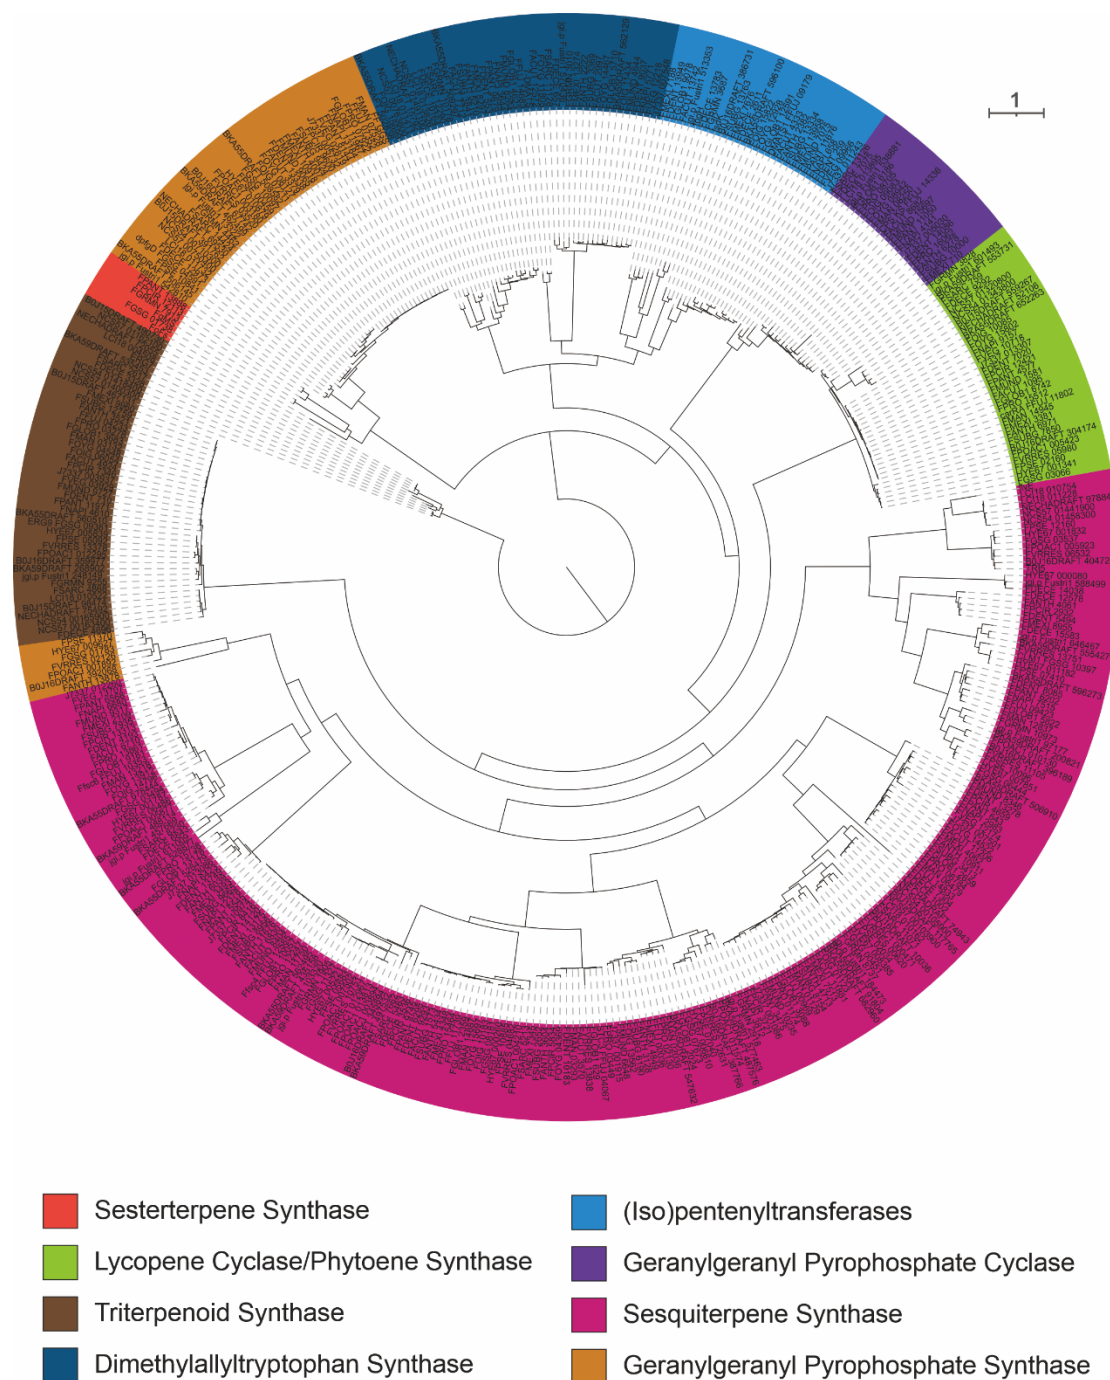

Figure S2: Cluster analysis of terpenoid synthase and their homologues based on phylogenetic tree.

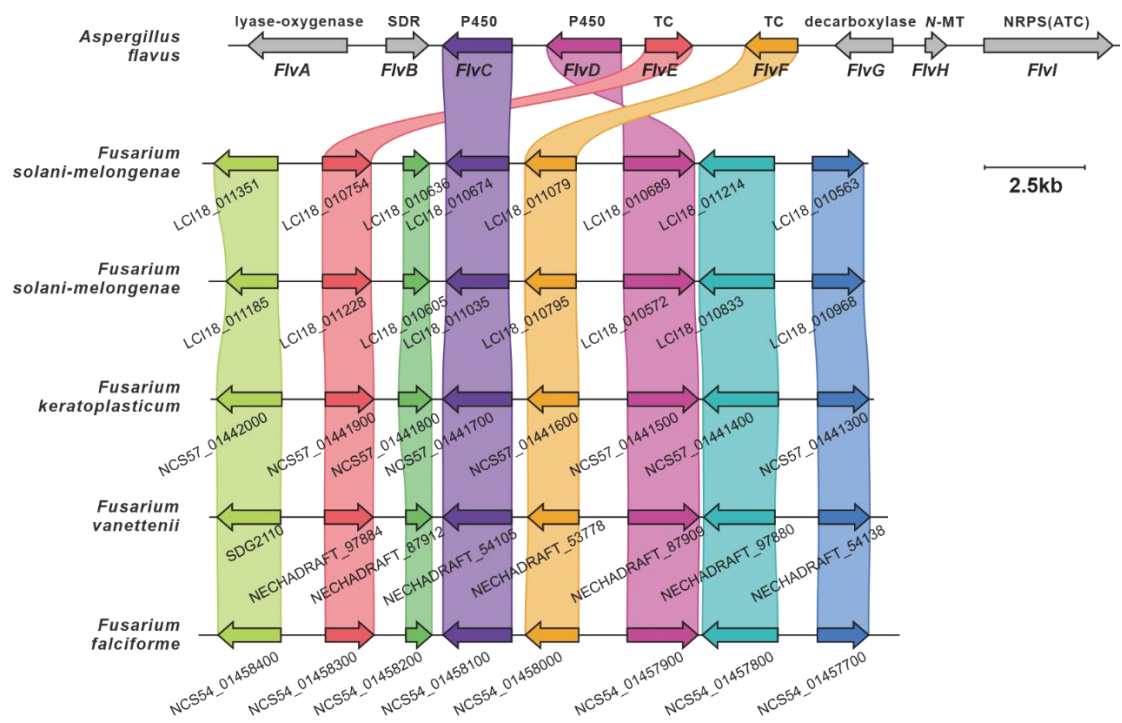

Figure S3: Comparison of *FlvBGCs* from different species.

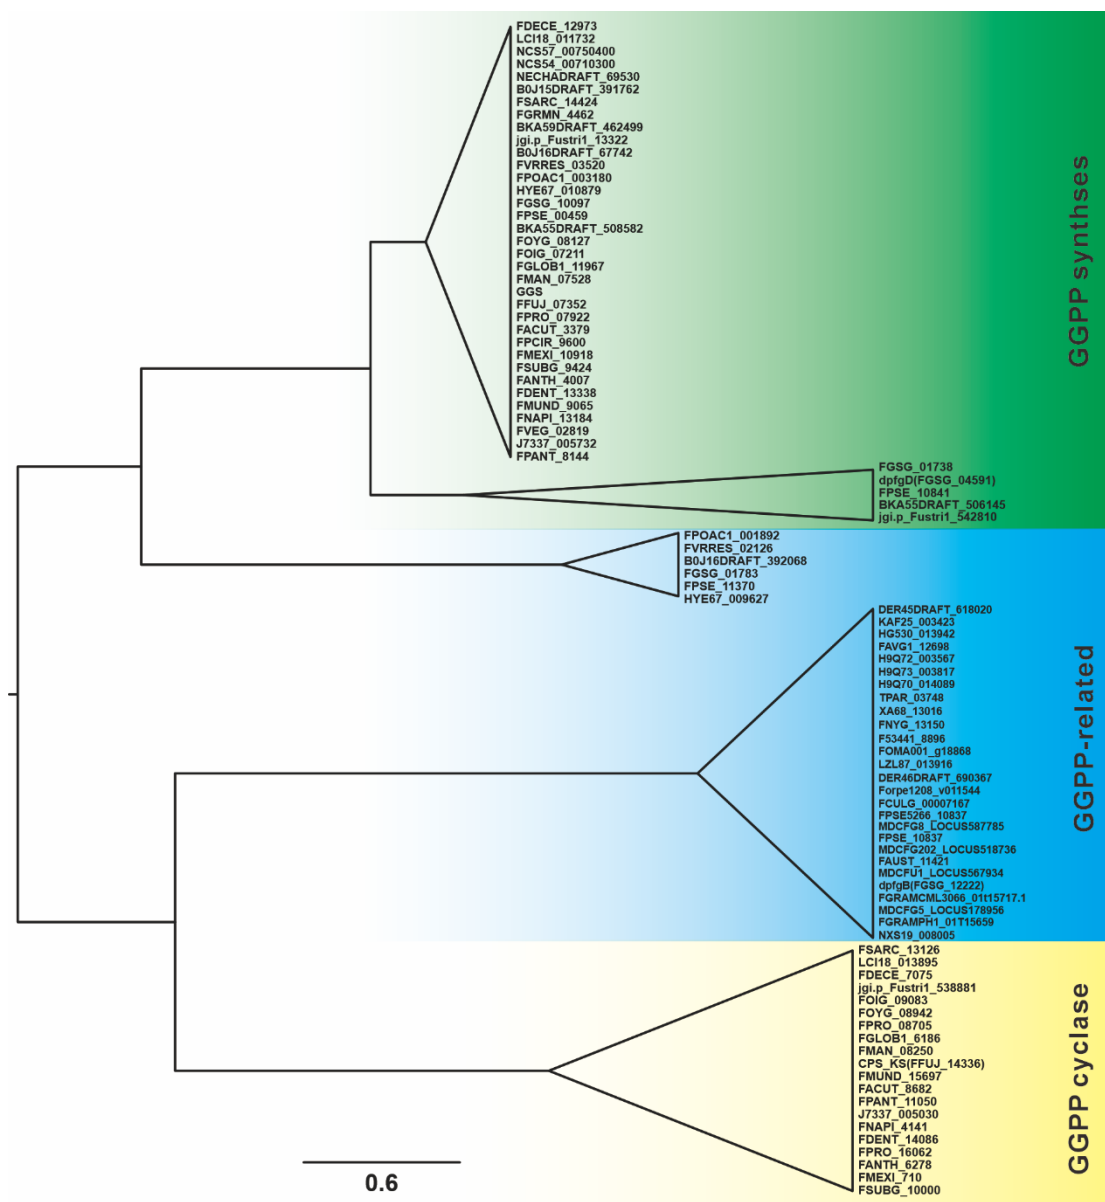

Figure S4: Phylogenetic tree-based cluster analysis of GGPP-related enzymes.



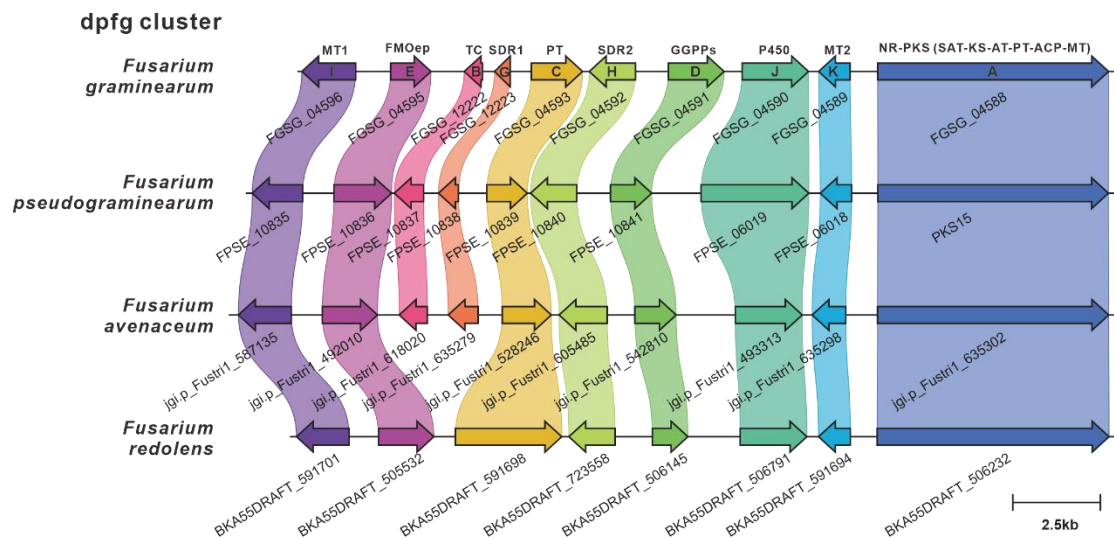

Figure S5: Comparison of *dpfg*BGCs from different pathogenic *Fusarium* species.



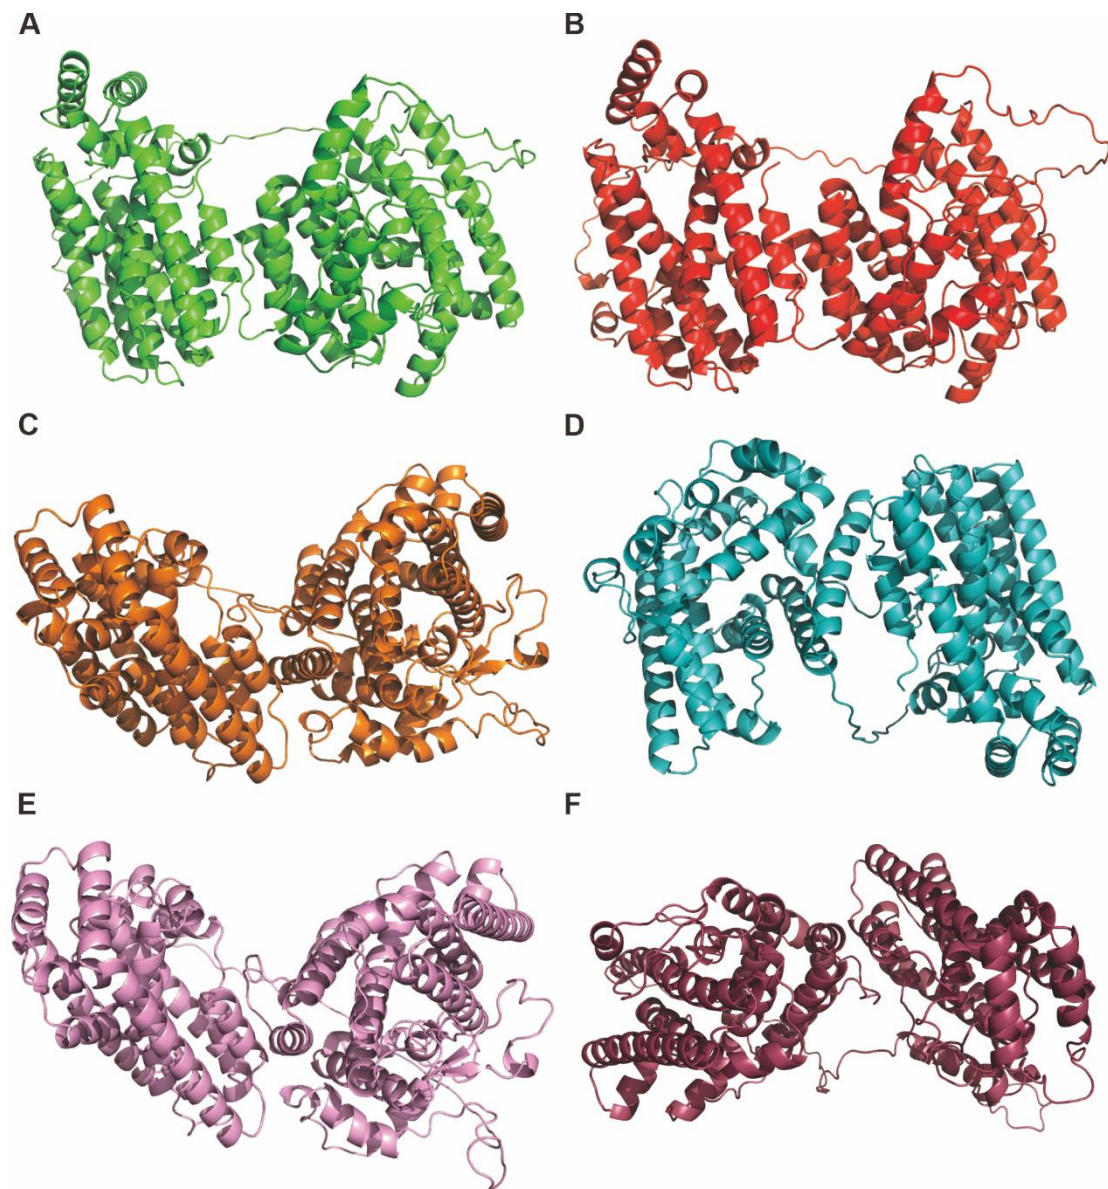

Figure S6: The predicted three-dimensional structure of protein of FgMS (A), FGSG\_01738 (B), FGRMN\_7913 (C), FPCIR\_12113 (D), FPANT\_13888 (E) and FoFs(F) **predicted by AlphaFold**.

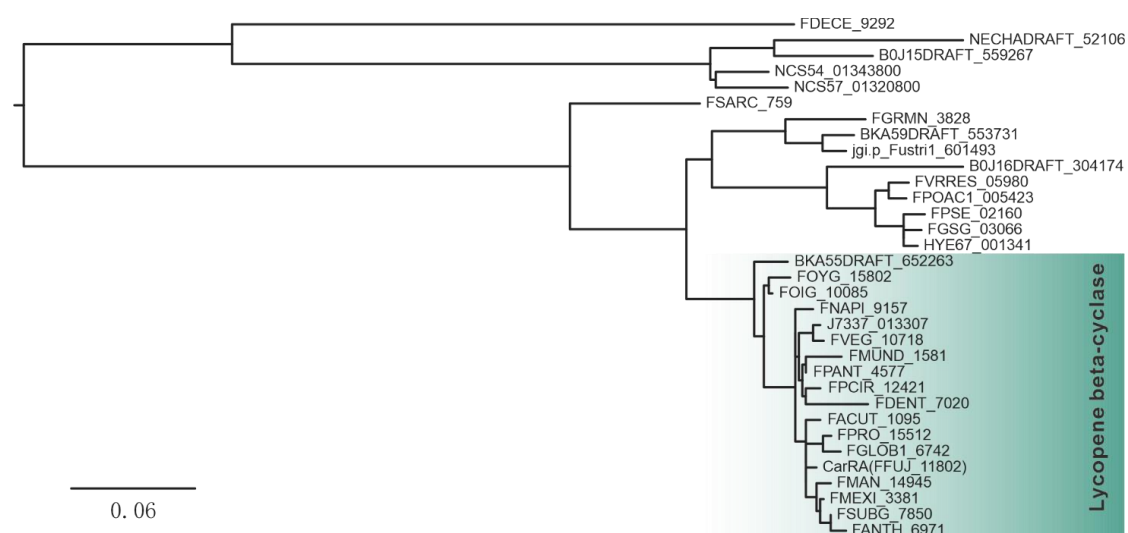

Figure S7: Phylogenetic tree-based cluster analysis of CarRA and its homologues.

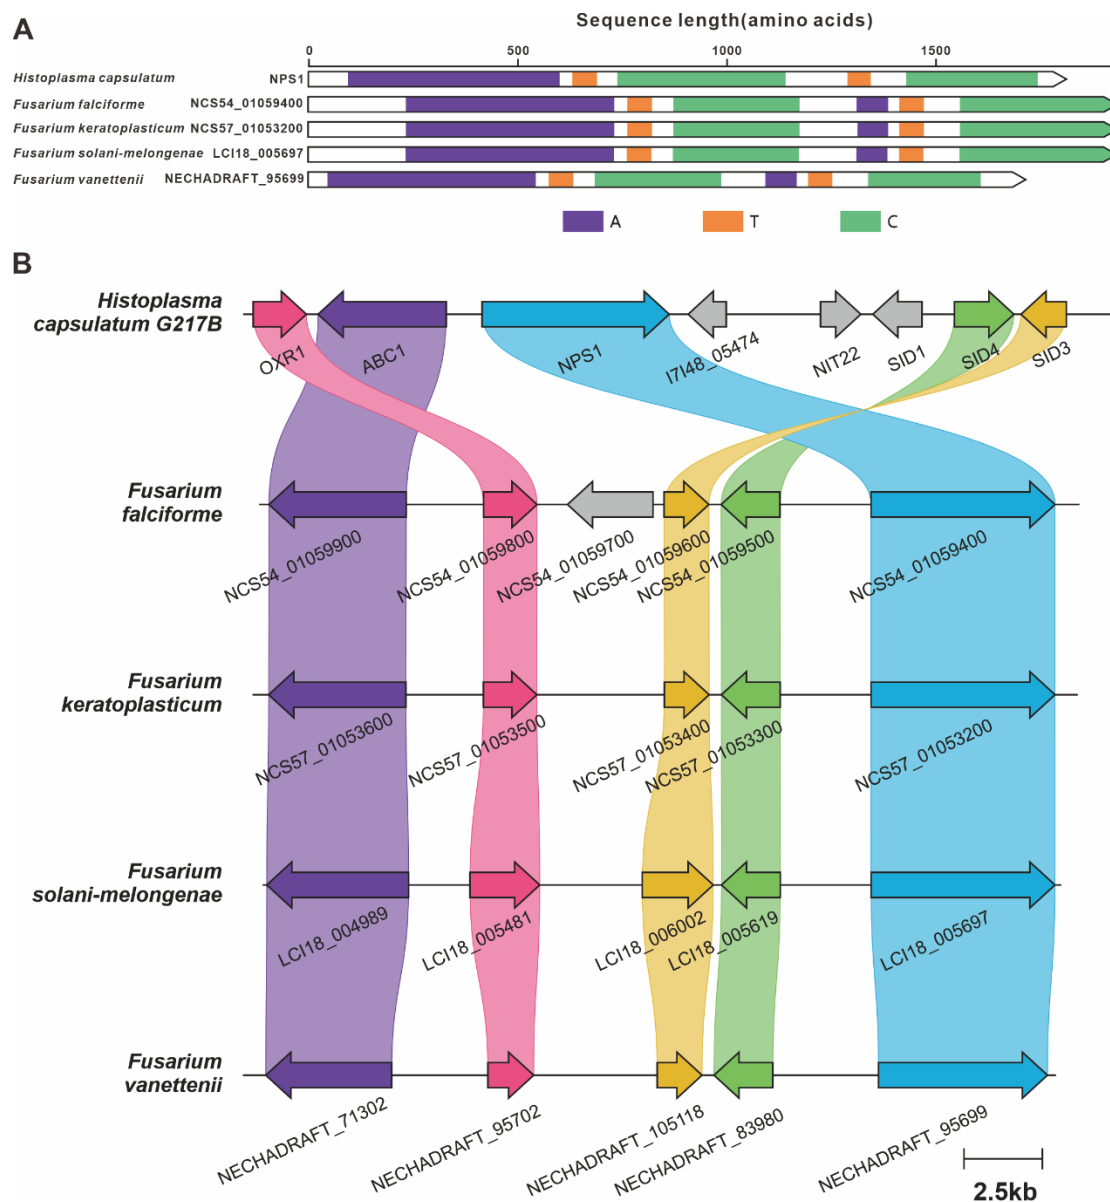

Figure S8: Domain comparison of NPS1 and its homologues(A), comparison of the BGCs containing *nps1* from different species(B).

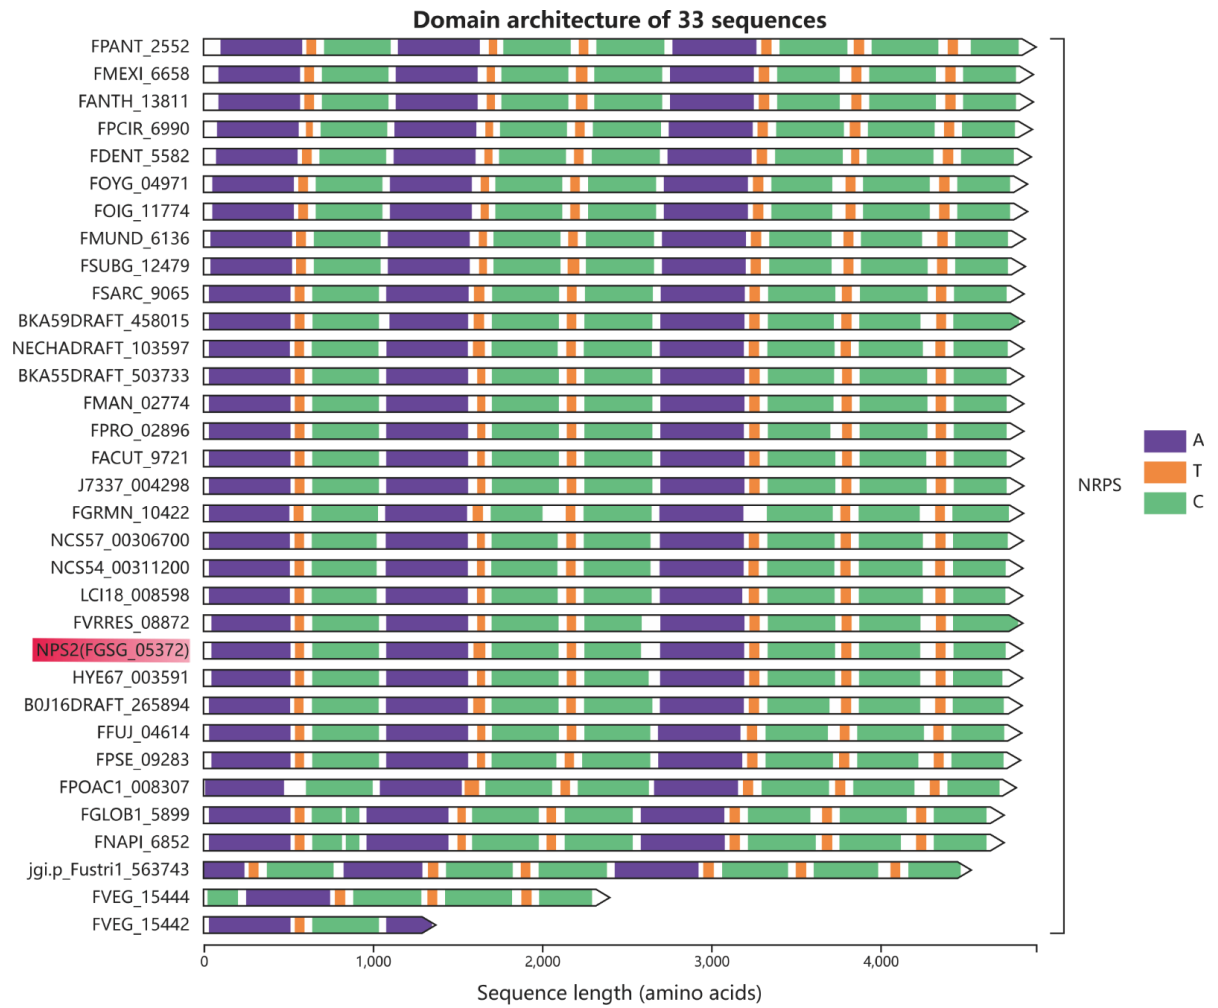

Figure S9: Domain comparison of NPS2 and its homologues.



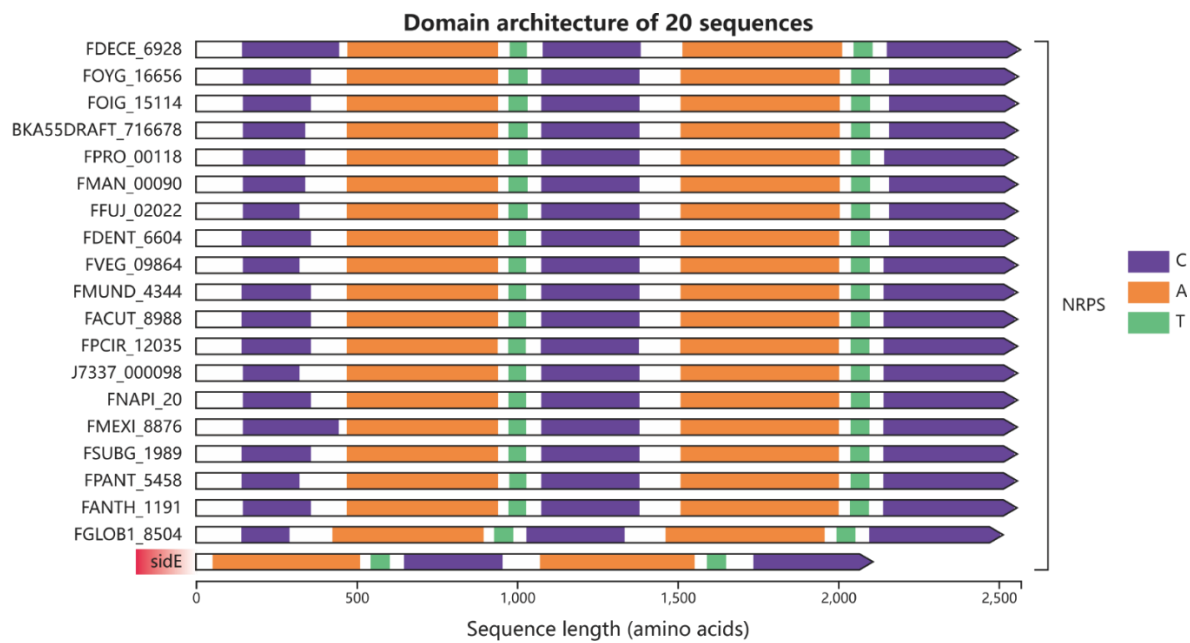

Figure S11: Domain comparison of SidE and its homologues.



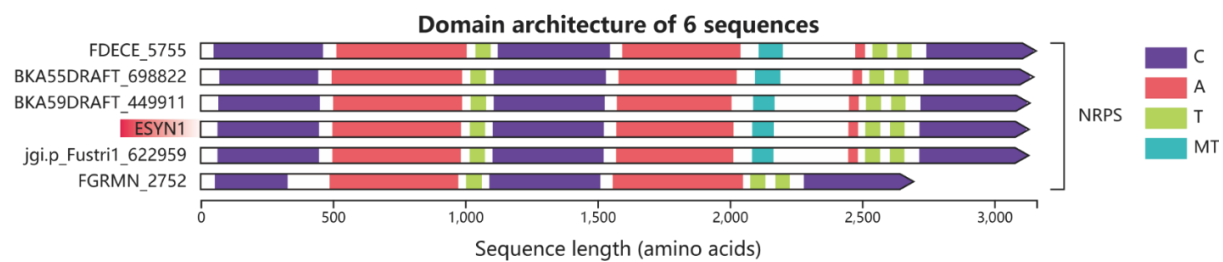

Figure S13: Domain comparison of ESYN1 and its homologues.





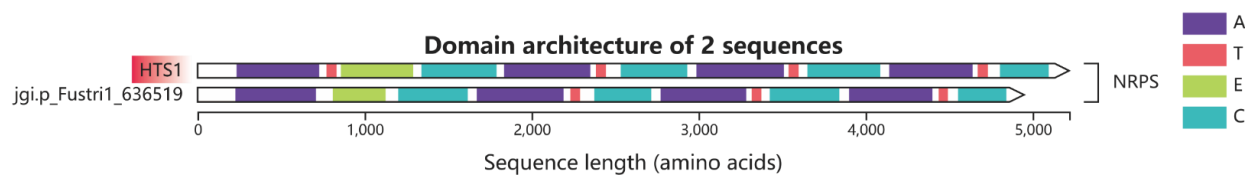

Figure S15: Domain comparison of HTS1 and its homologues.



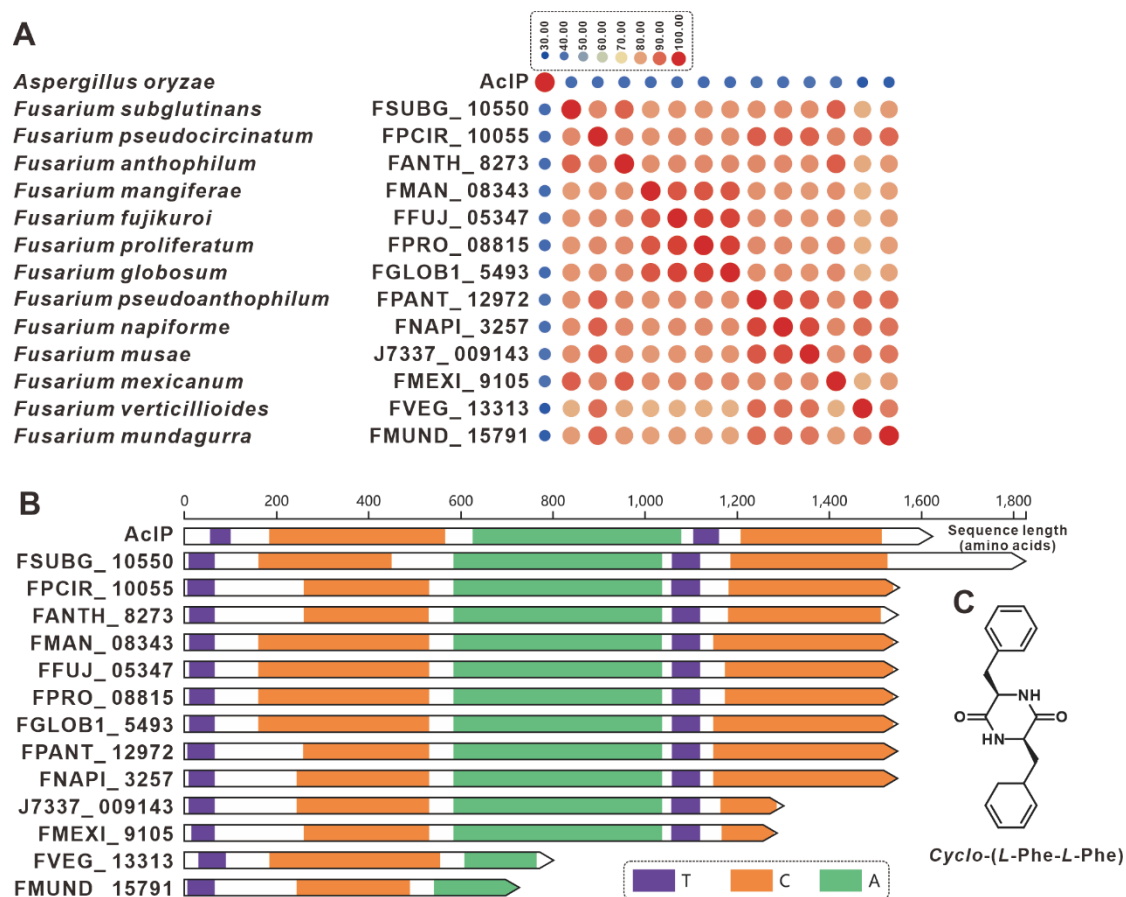

Figure S17: Comparative analysis of AclP and its homologues. Comparison of the amino acid sequence identity of AclP and its homologues(A), comparison of the structural domains of AclP and its homologues(B), structure of cyclo-(L-Phe-L-Phe)(C).



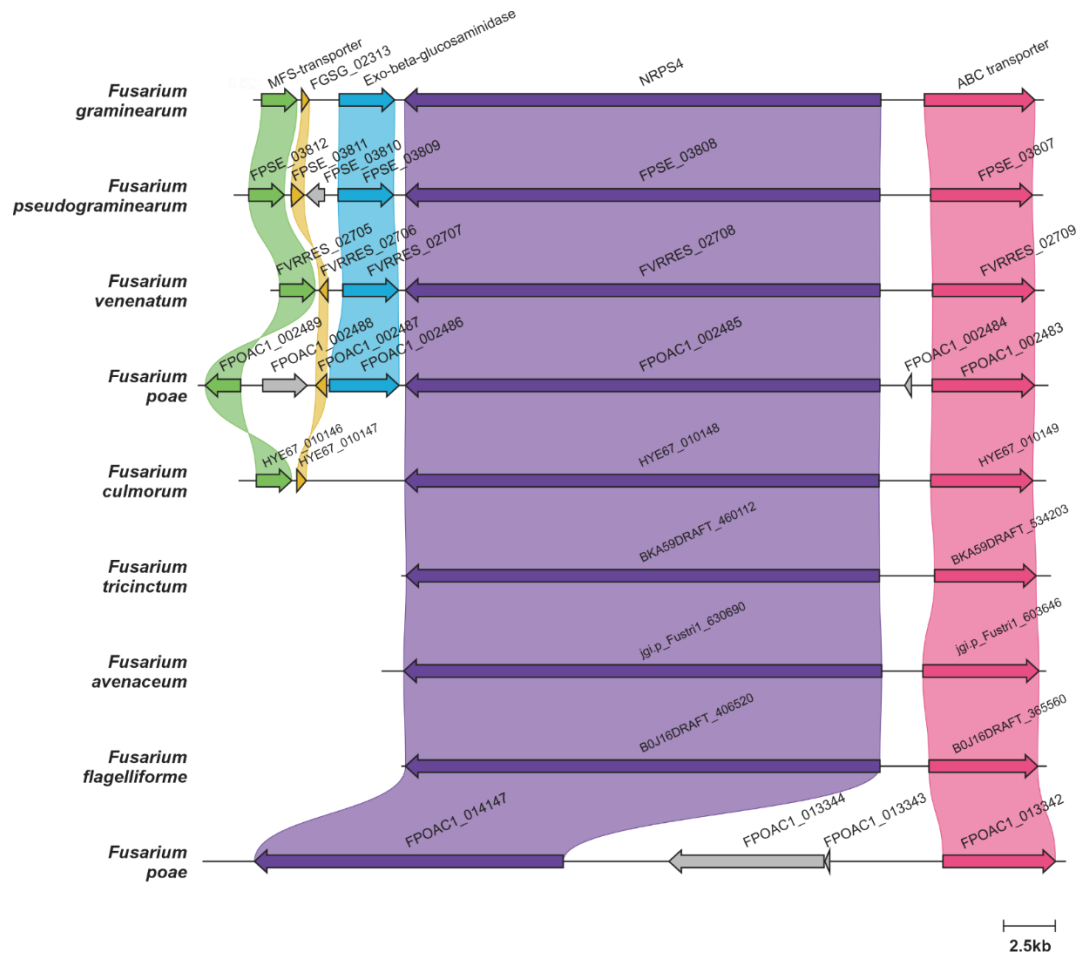

Figure S19: Comparison of the BGCs containing *nrps4* from different *Fusarium* species.

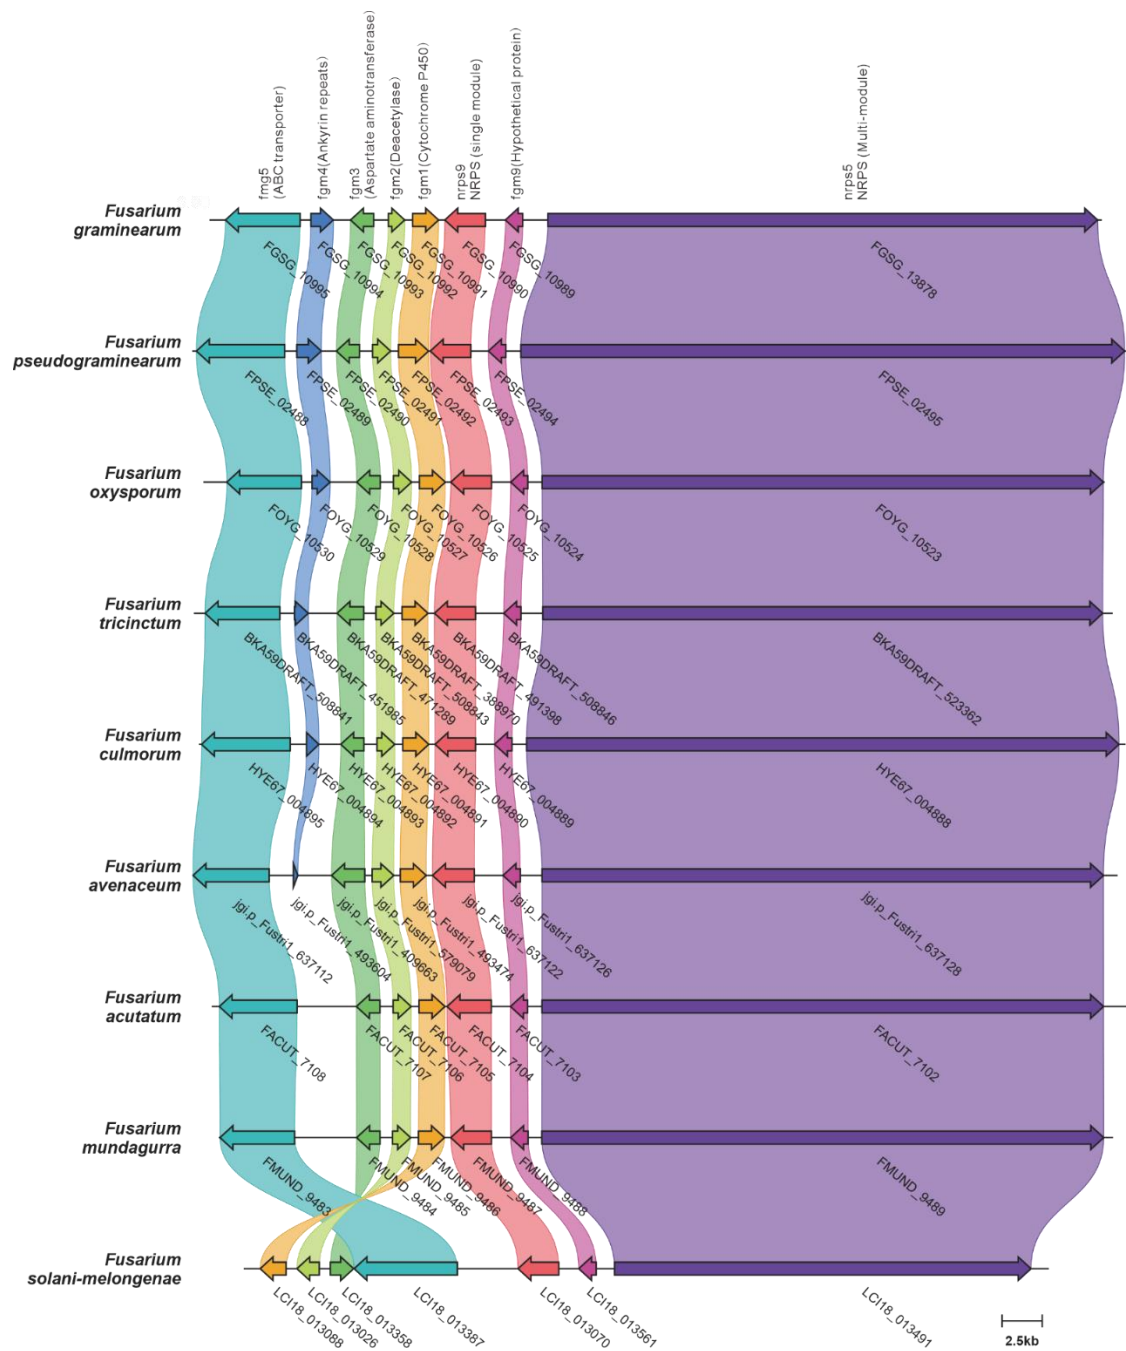

Figure S20: Comparison of the BGCs containing *nrps5* from different *Fusarium* species.

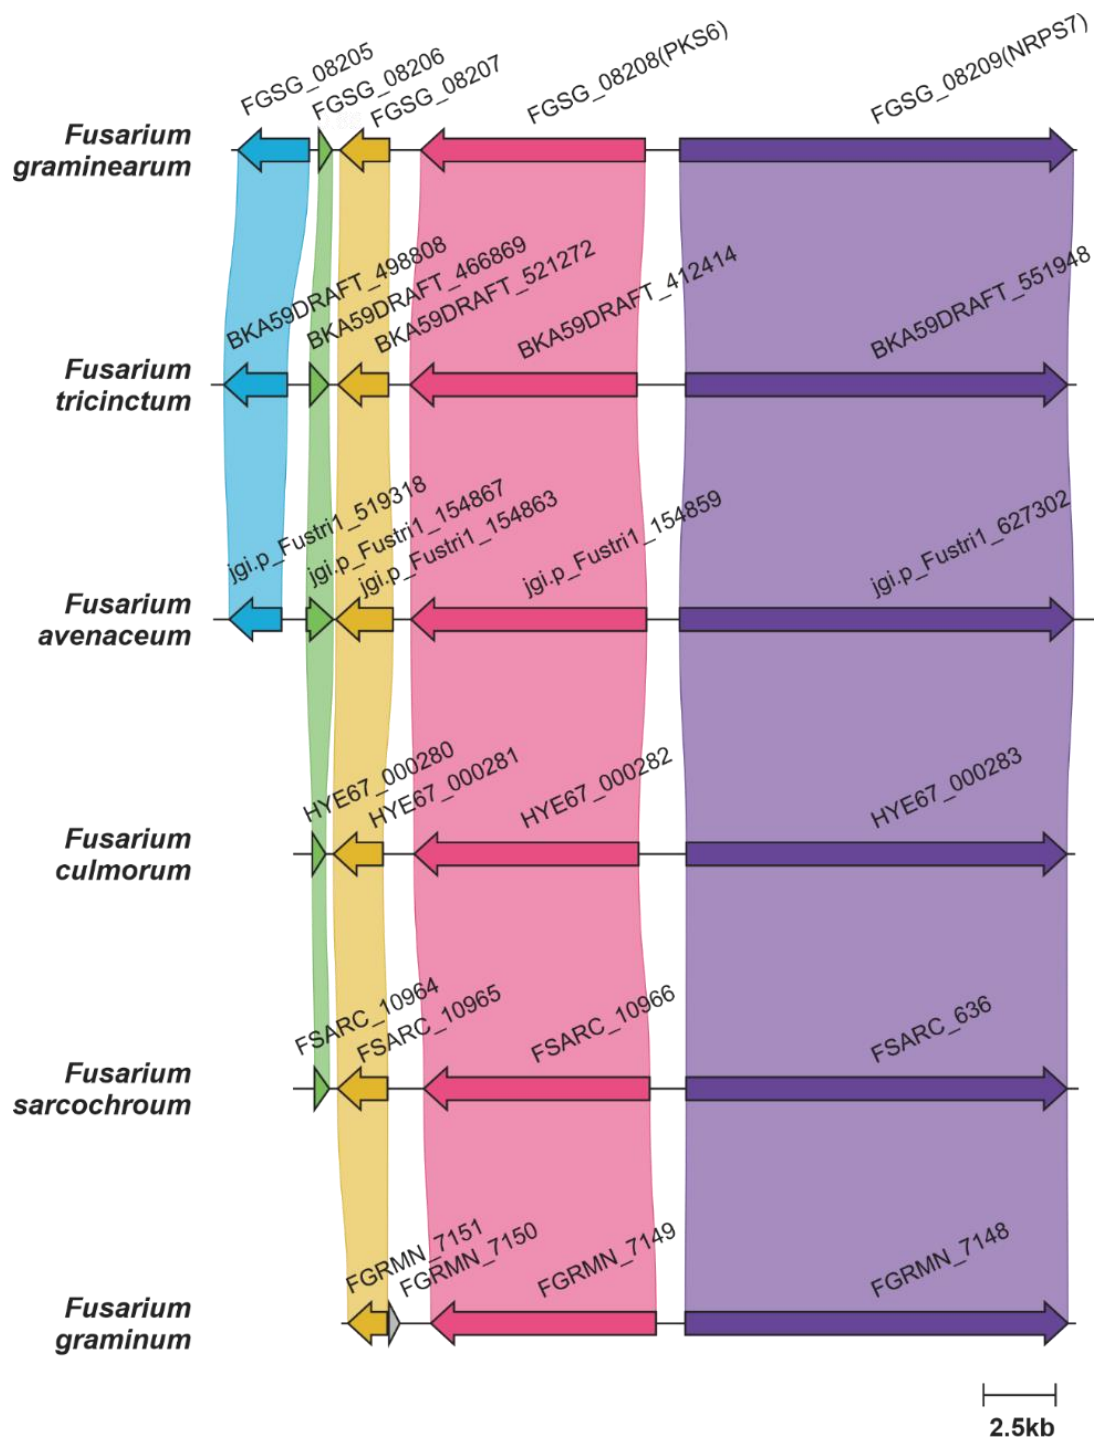

Figure S21: Comparison of the BGCs containing *nrps7* and PKS6 from different *Fusarium* species.



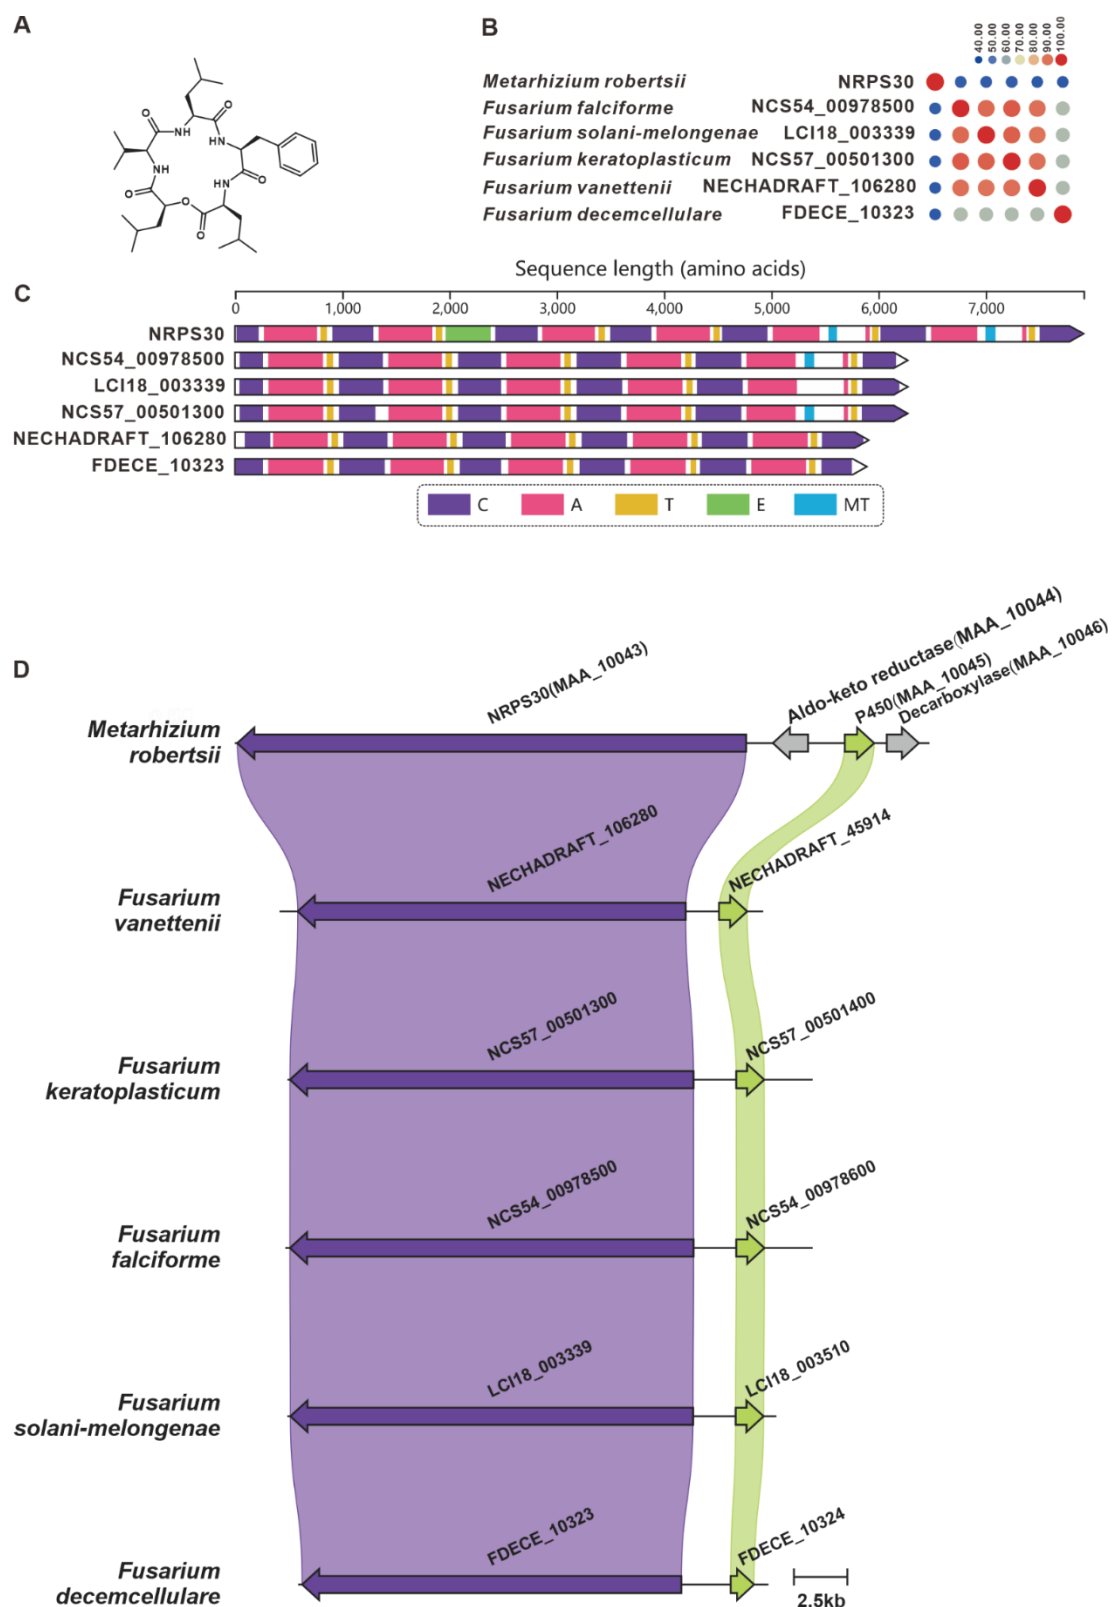

Figure S22: Structures of sansalvamide (A), comparison of the amino acid sequence identity of NRPS30 and its homologues (B), domain comparison of NRPS30 and its homologues (C), comparison of the BGC for aurofusarin and its similar BGCs (D).

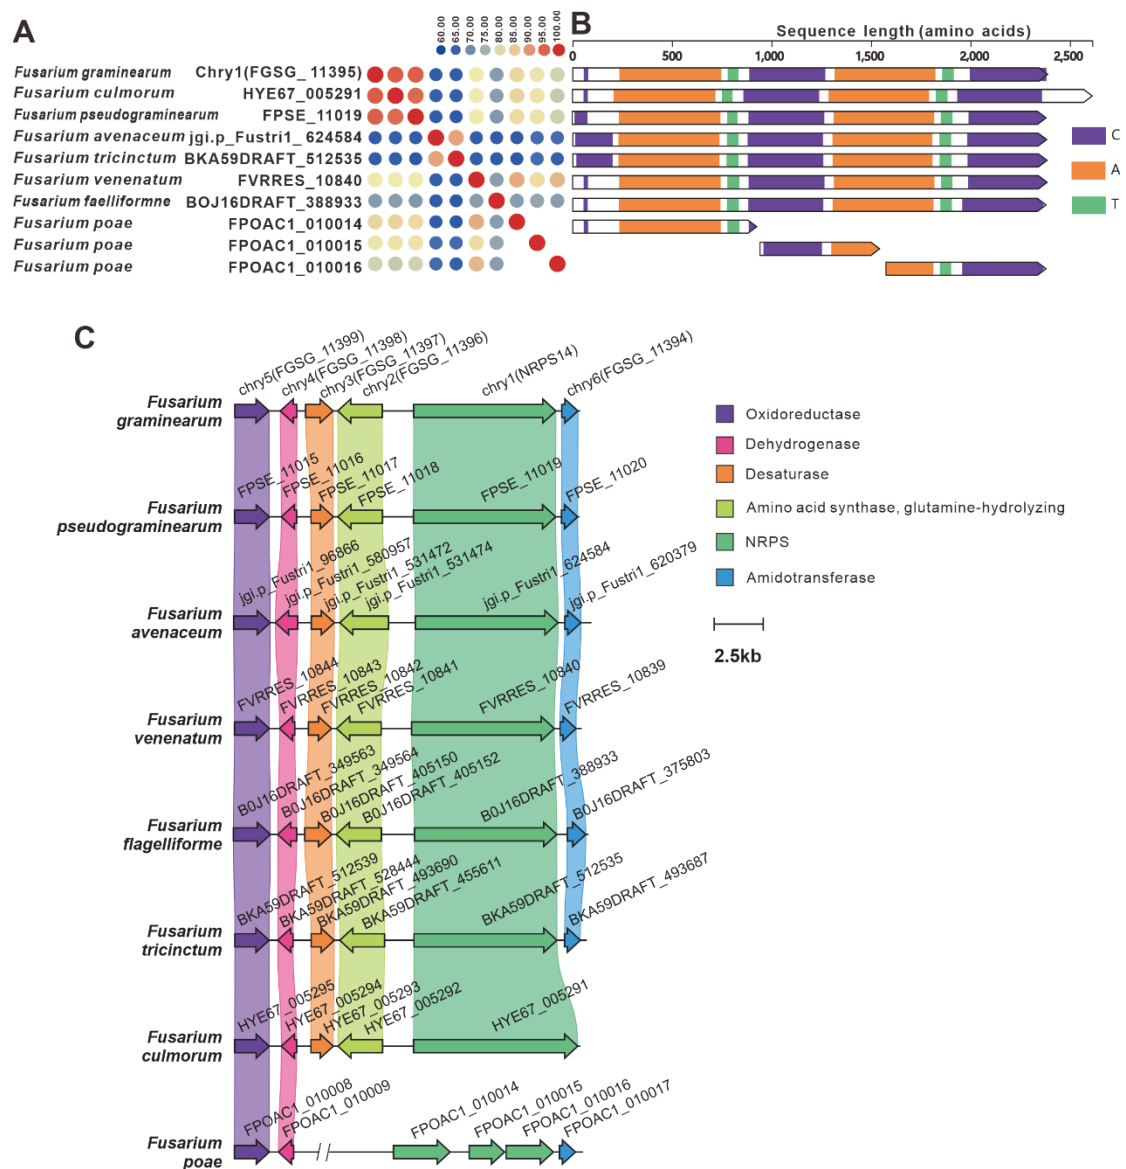

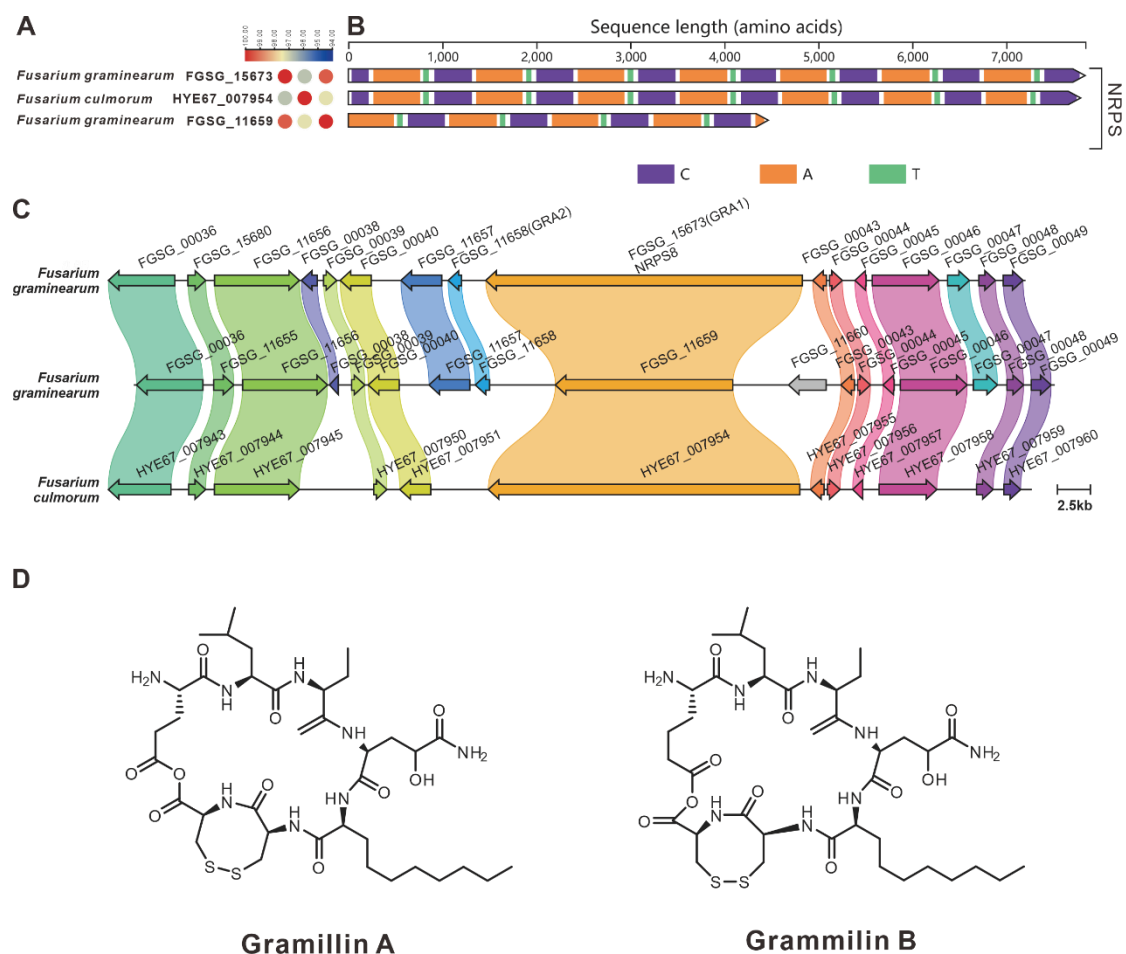

Figure S24: Comparison of the amino acid sequence identity of GRA1 and its homologues (A), domain comparison of GRA1 and its homologues (B), comparison of the BGC for Gramillin A, Gramillin B and its similar BGCs (C), structure of Gramillin A and Gramillin B (D).

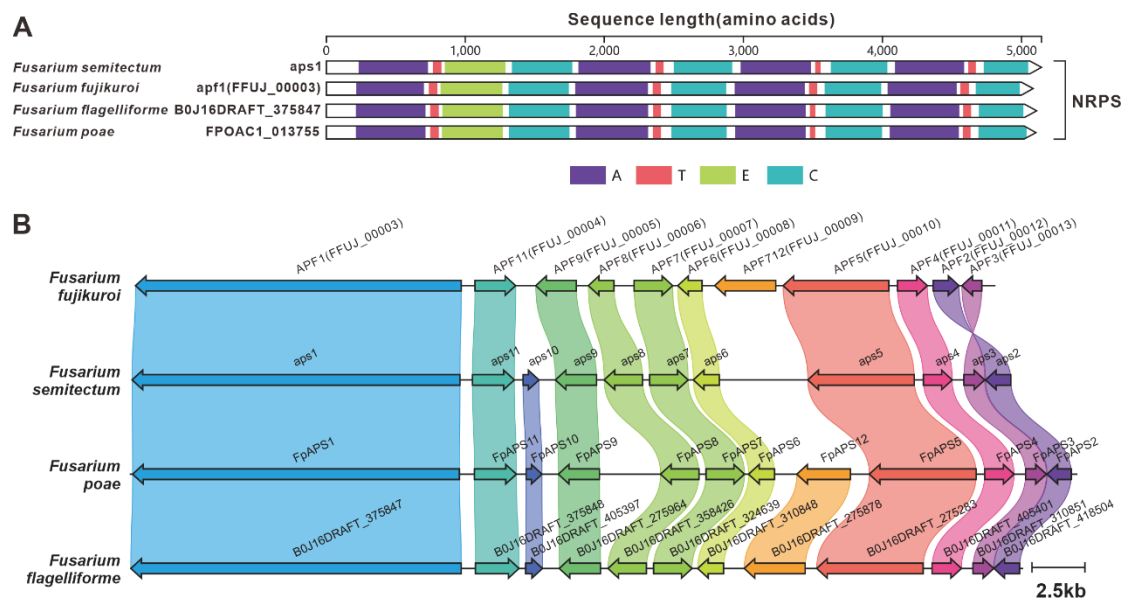

Figure S25: Domain comparison of apf1 and its homologues (A), comparison of apfBGCs from different *Fusarium* species (B).

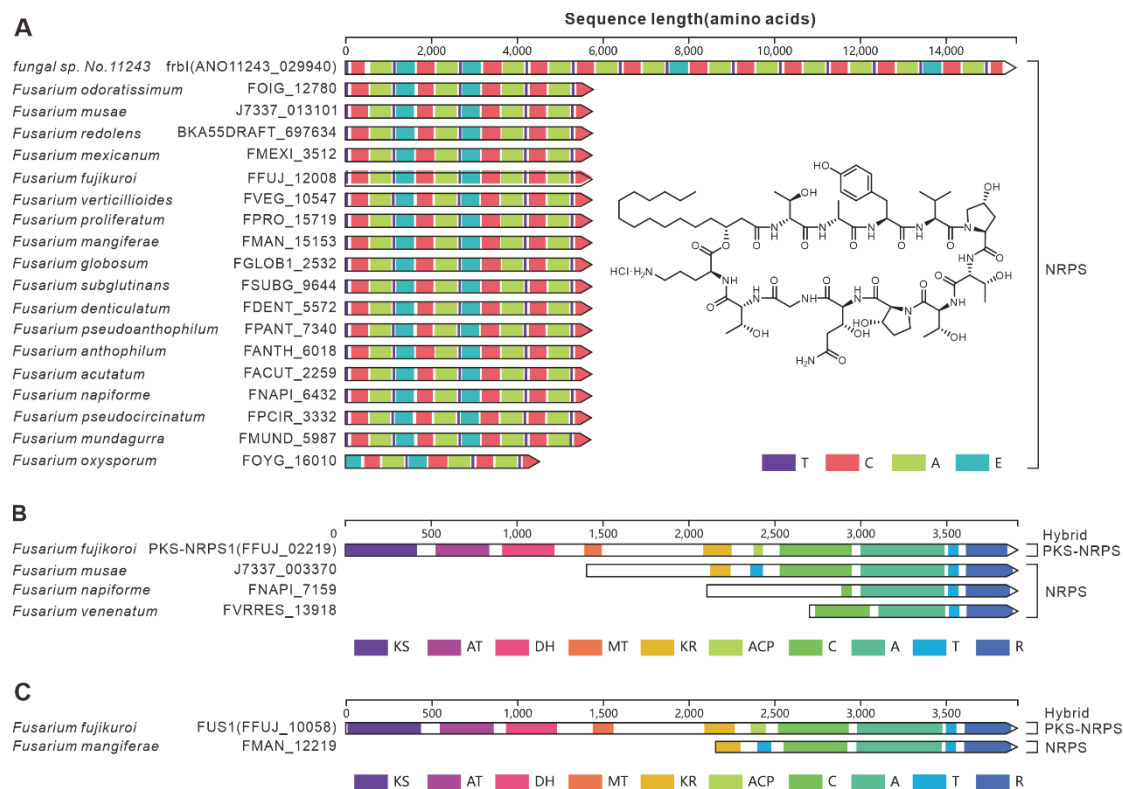

Figure S26: Domain comparison of FrbI and its homologues (A), domain comparison of PKS-NRPS1 and its homologues (B), domain comparison of FUS1 and its homologues (C).

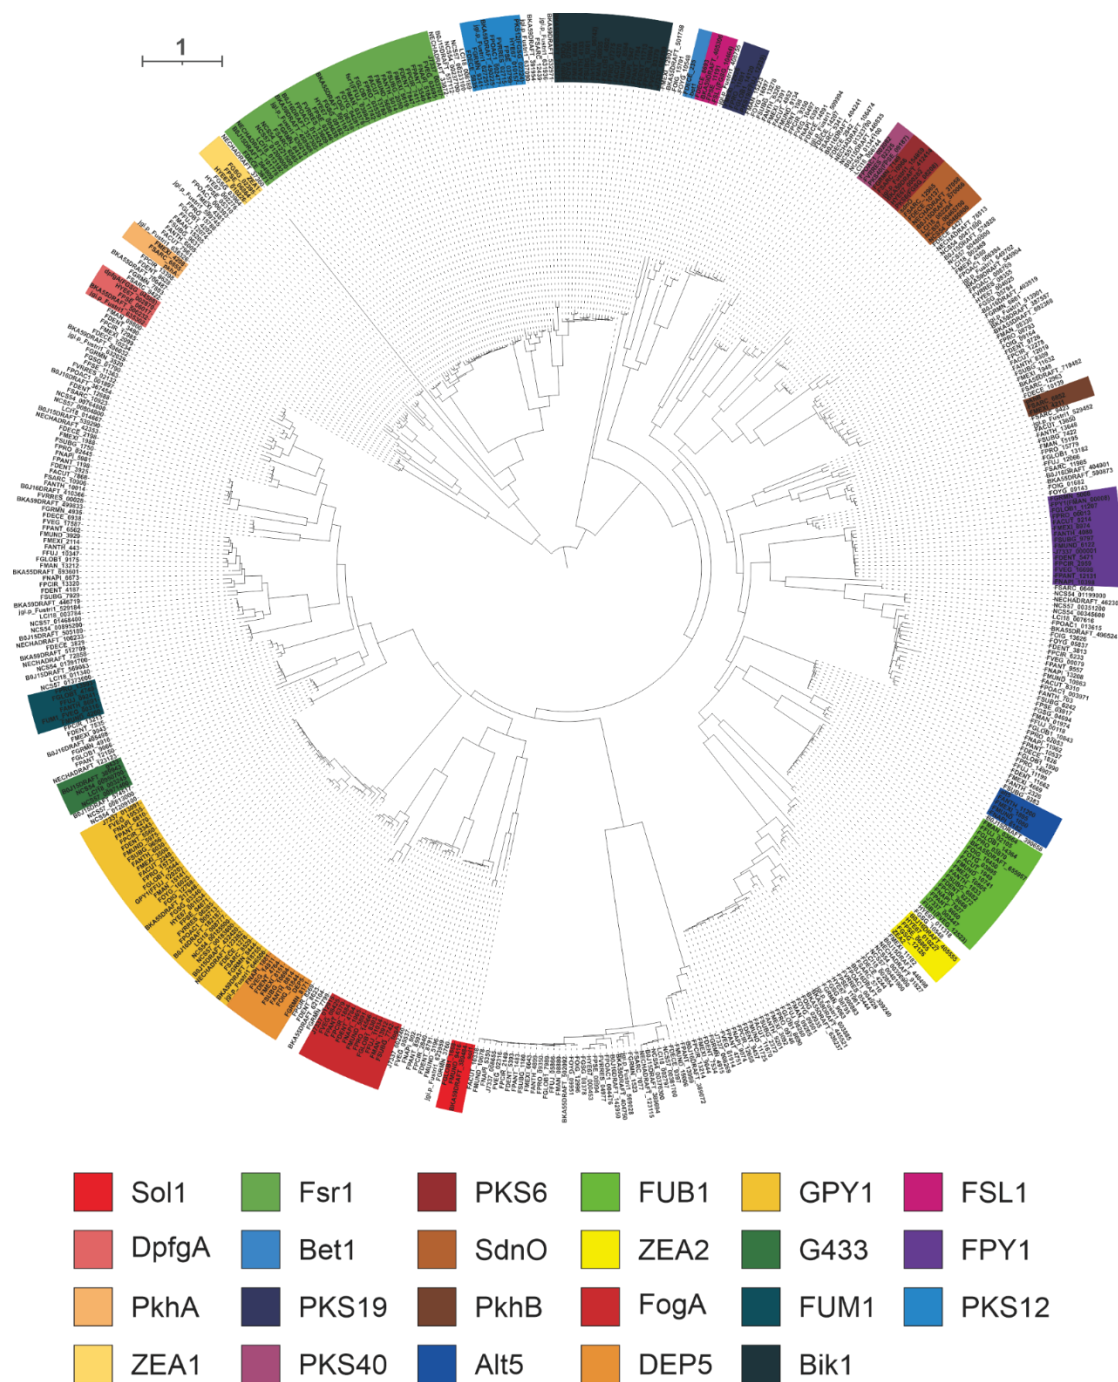

Figure S27: Phylogenetic tree-based cluster analysis of PKS-related enzymes.

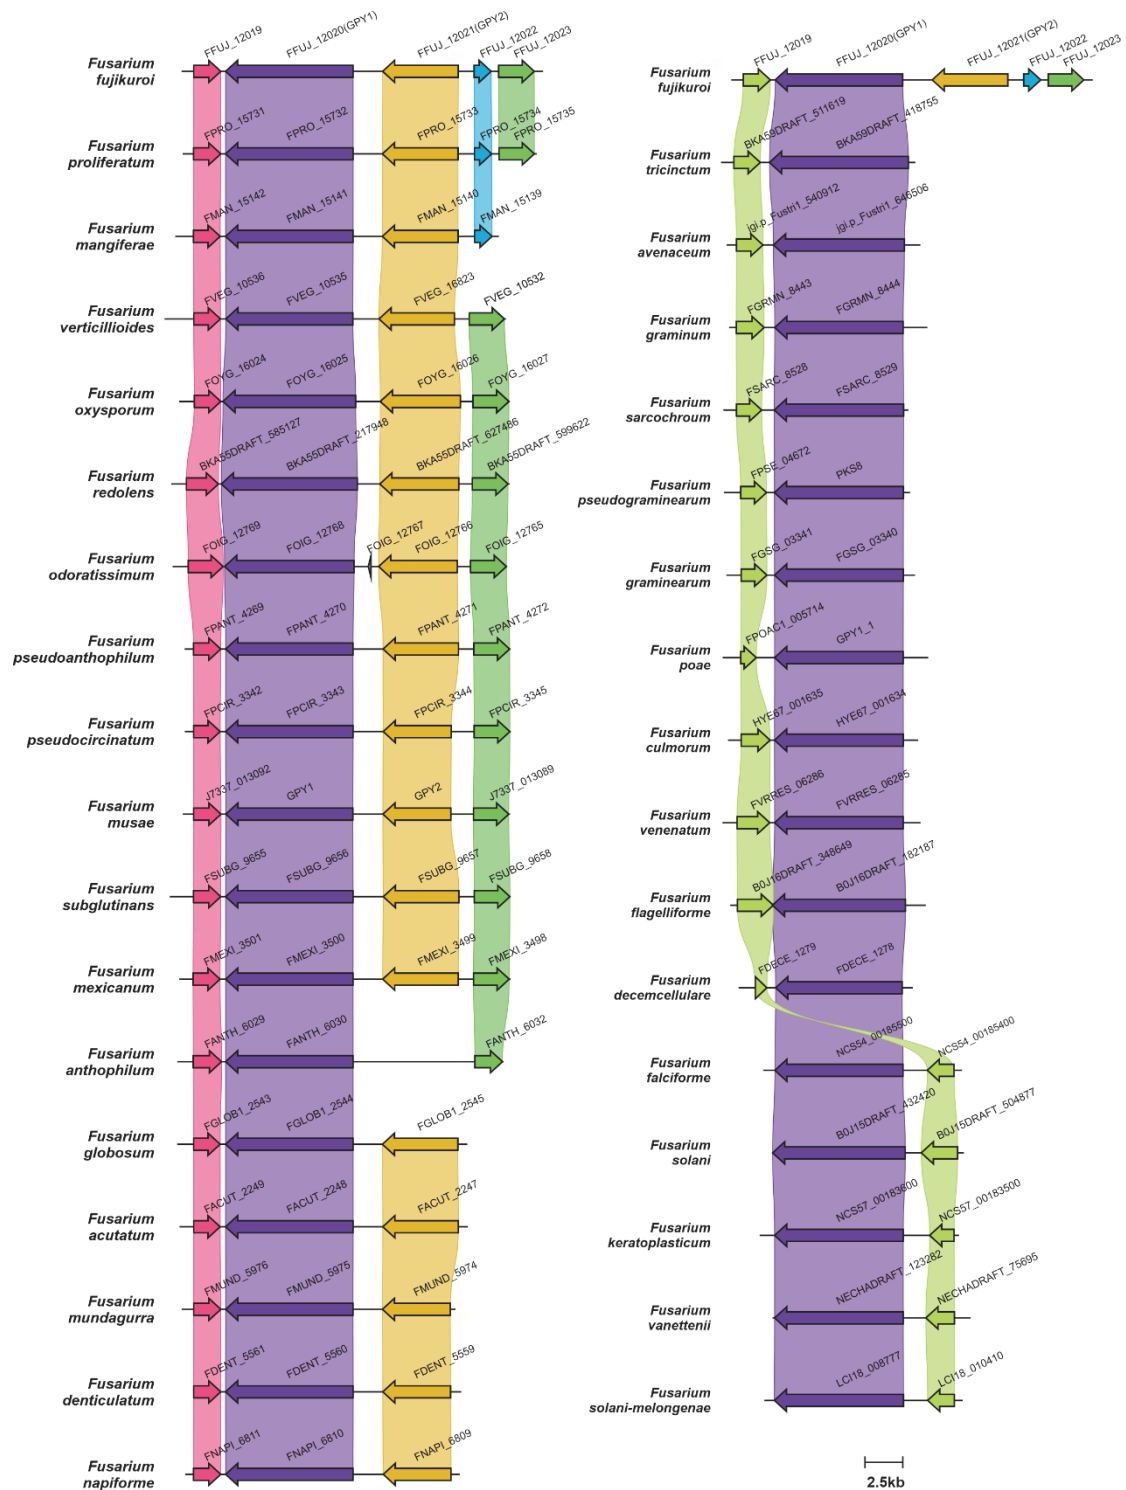

Figure S28: Comparison of *gpy*BGCs from different *Fusarium* species.



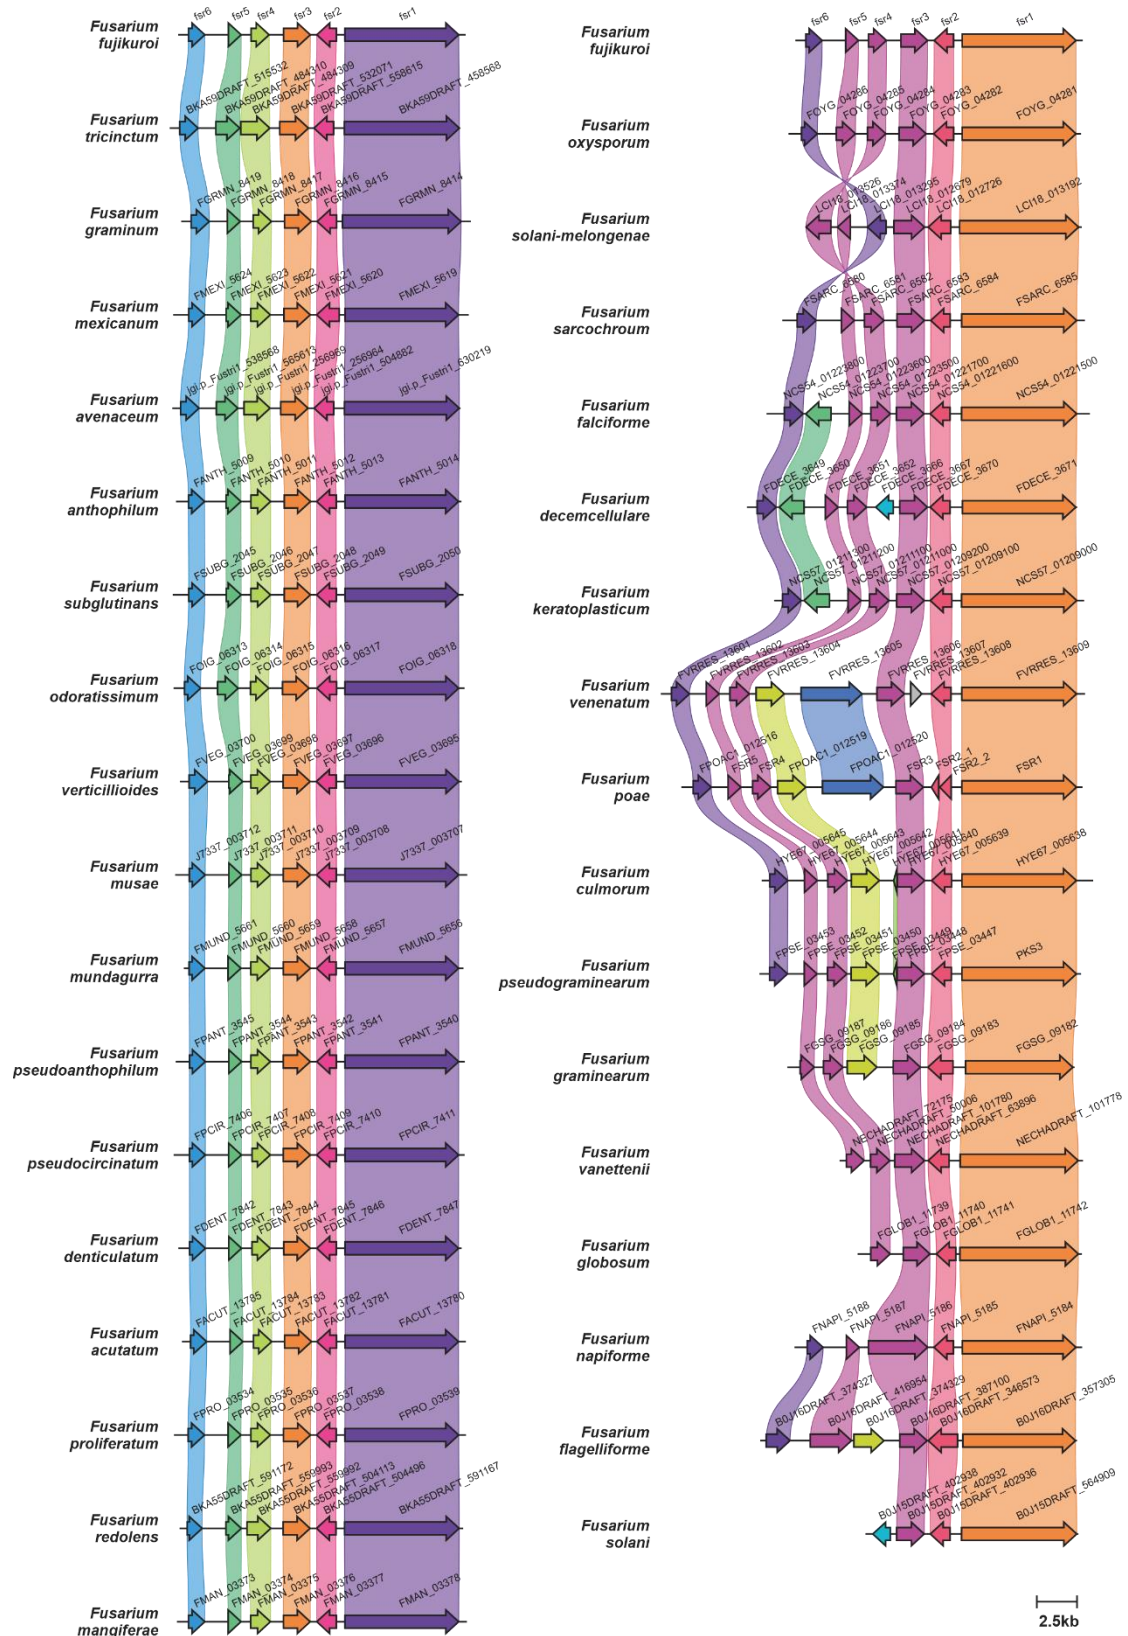

Figure S29: Comparison of *fsrBGCs* from different *Fusarium* species.





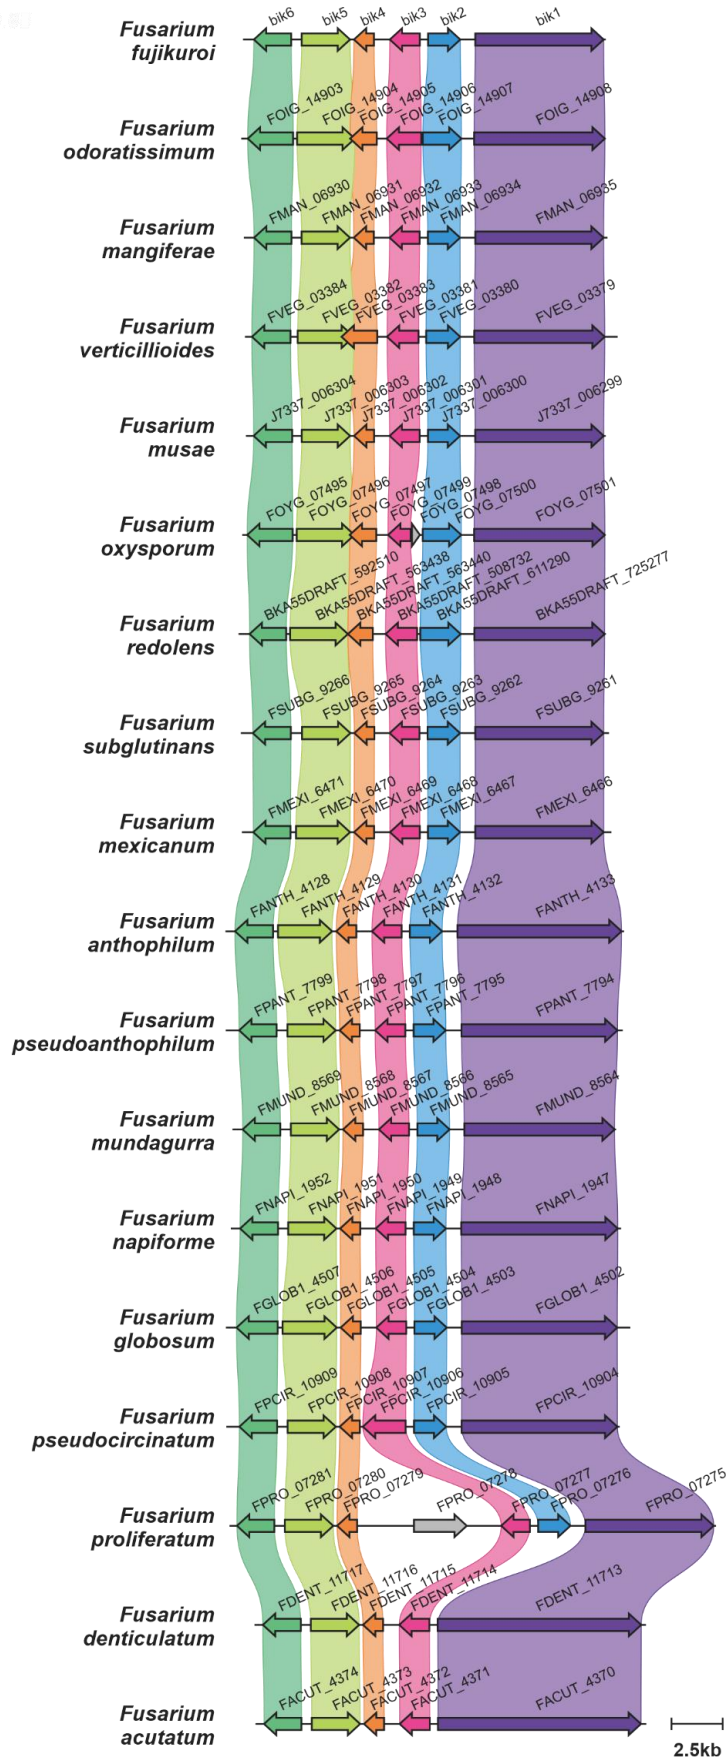

Figure S31: Comparison of *bik*BGCs from different *Fusarium* species.

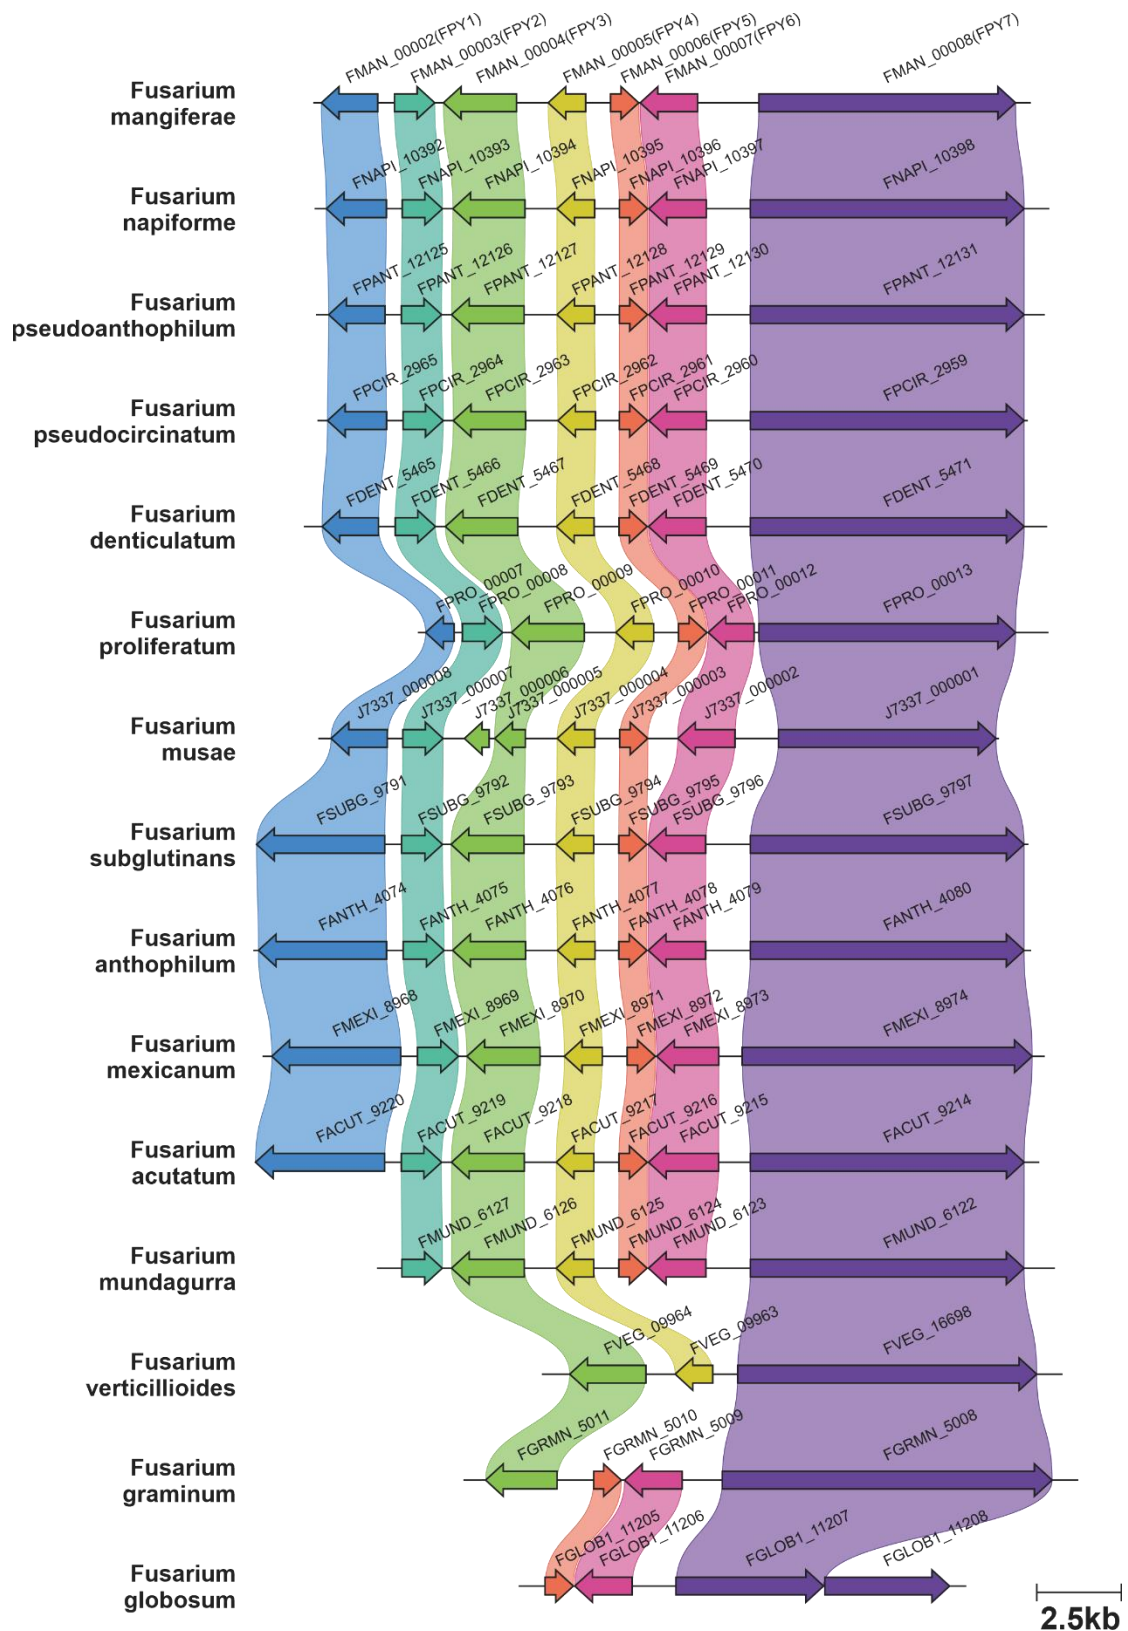

Figure S32: Comparison of FPYBGCs from different *Fusarium* species.

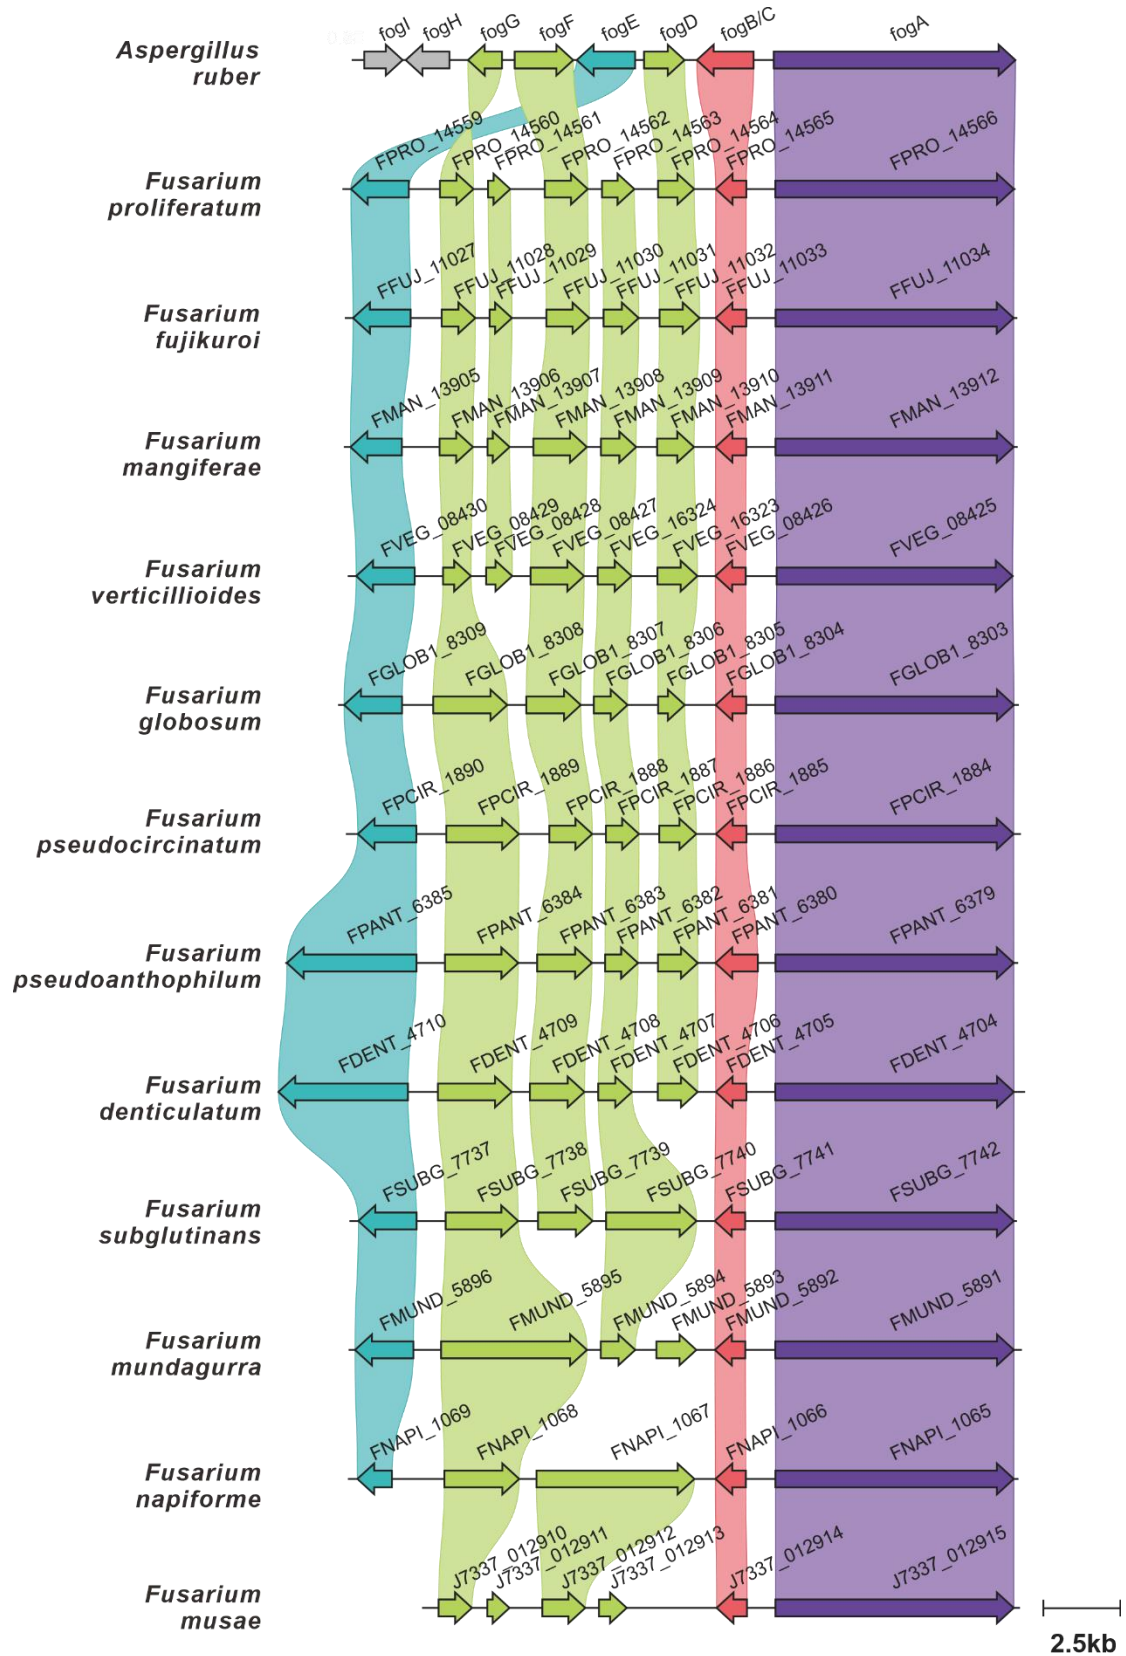

Figure S33: Comparison of *fog*BGCs from different *Fusarium* species.



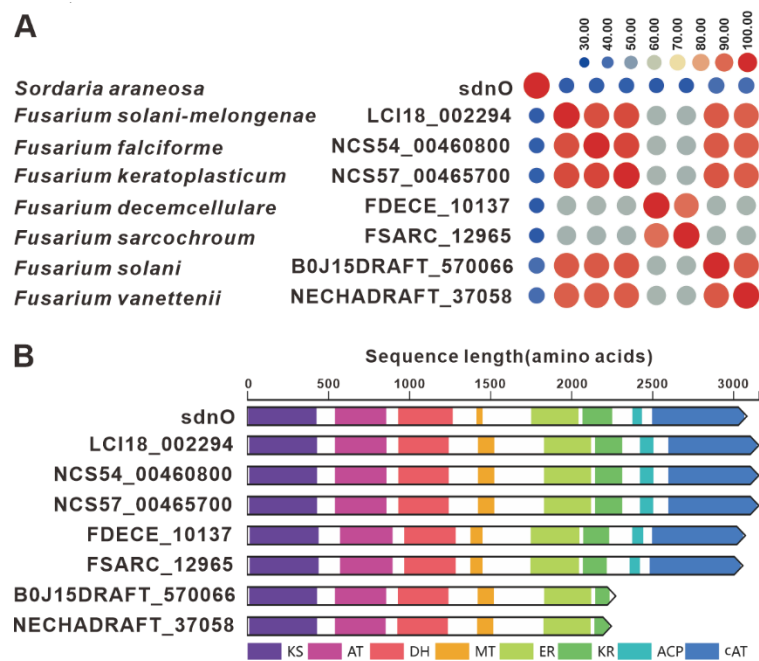

Figure S34: Comparison of the amino acid sequence identity of SdnO and its homologues (A), domain comparison of SdnO and its homologues (B).

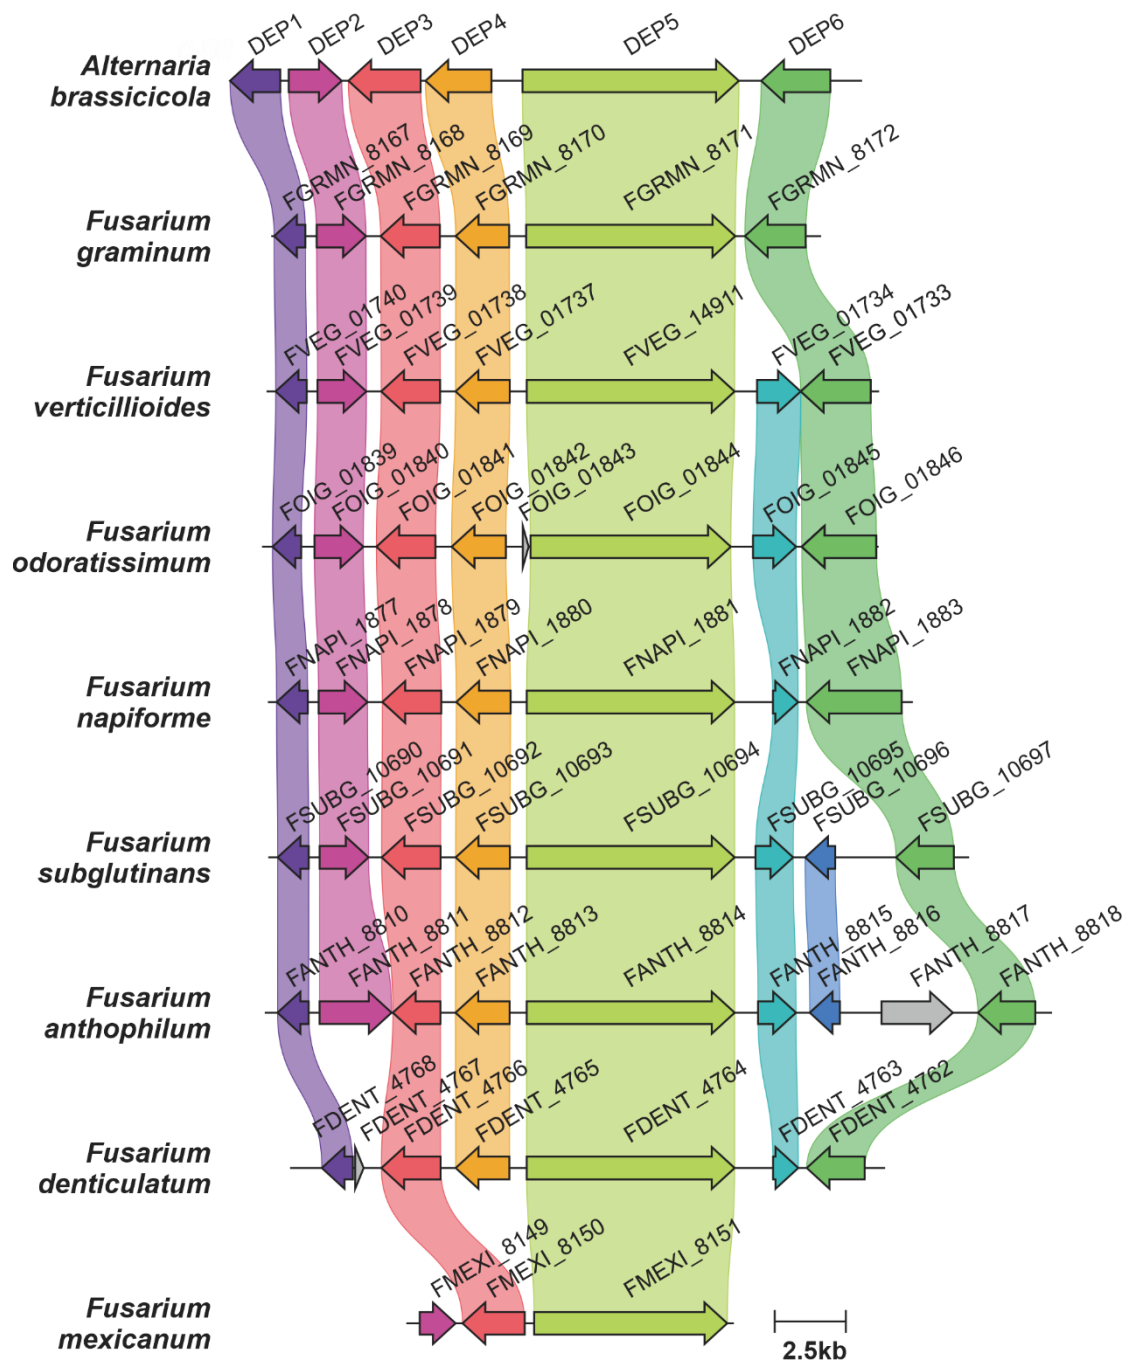

Figure S35: Comparison of *DEPBGCs* from different *Fusarium* species.

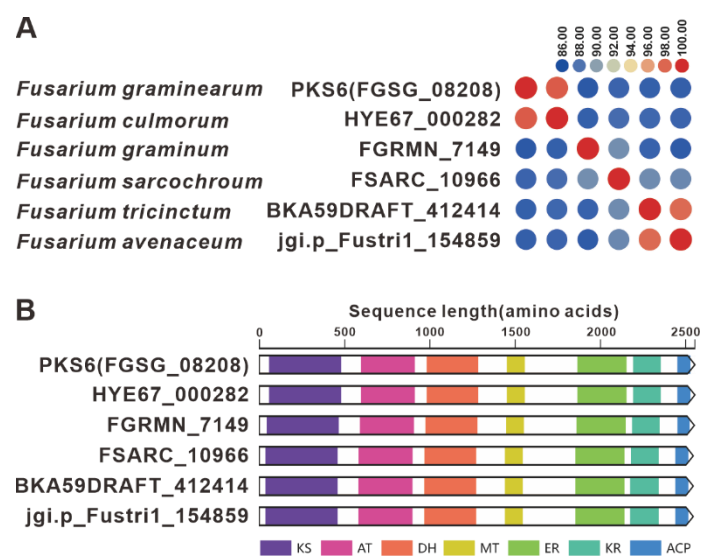

Figure S36: Comparison of the amino acid sequence identity of PKS6 and its homologues (A), domain comparison of PKS6 and its homologues (B).

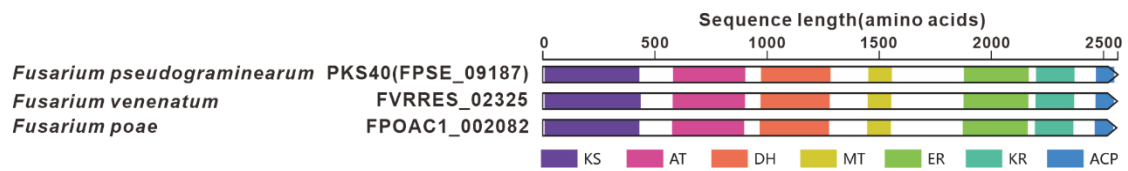

Figure S37: Domain comparison of PKS40 and its homologues.



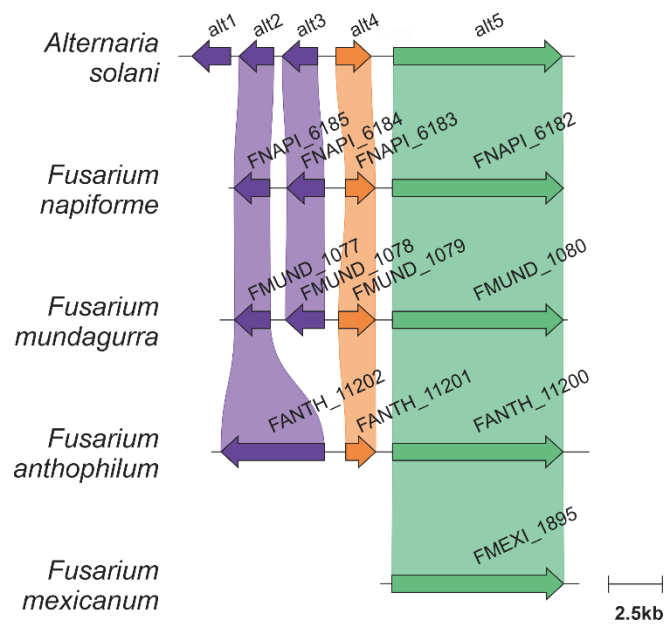

Figure S38: Comparison of *altBGCs* from different *Fusarium* species.

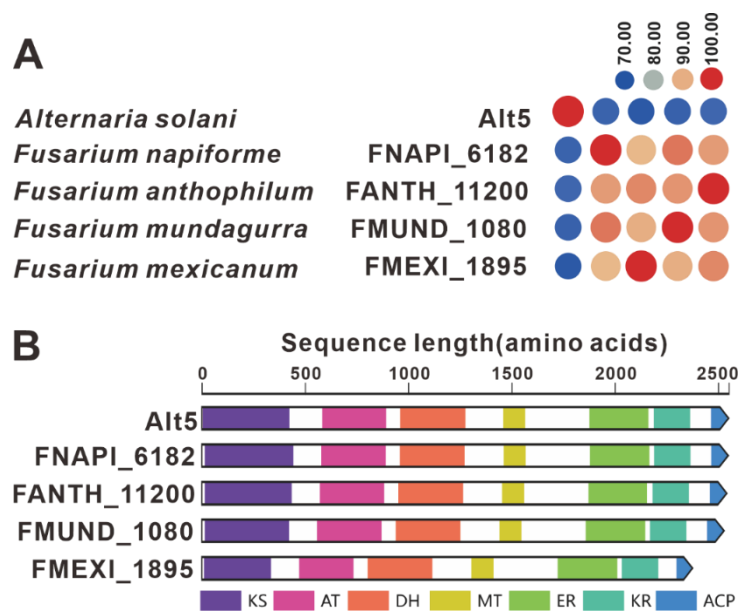

Figure S39: Comparison of the amino acid sequence identity of Alt5 and its homologues (A), domain comparison of Alt5 and its homologues (B).

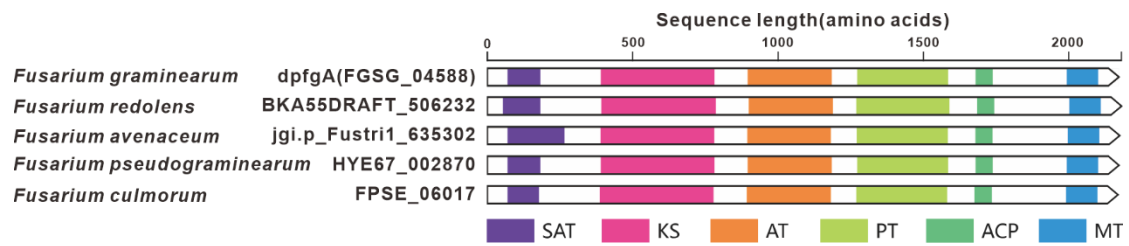

Figure S40: Domain comparison of DpfgA and its homologues.

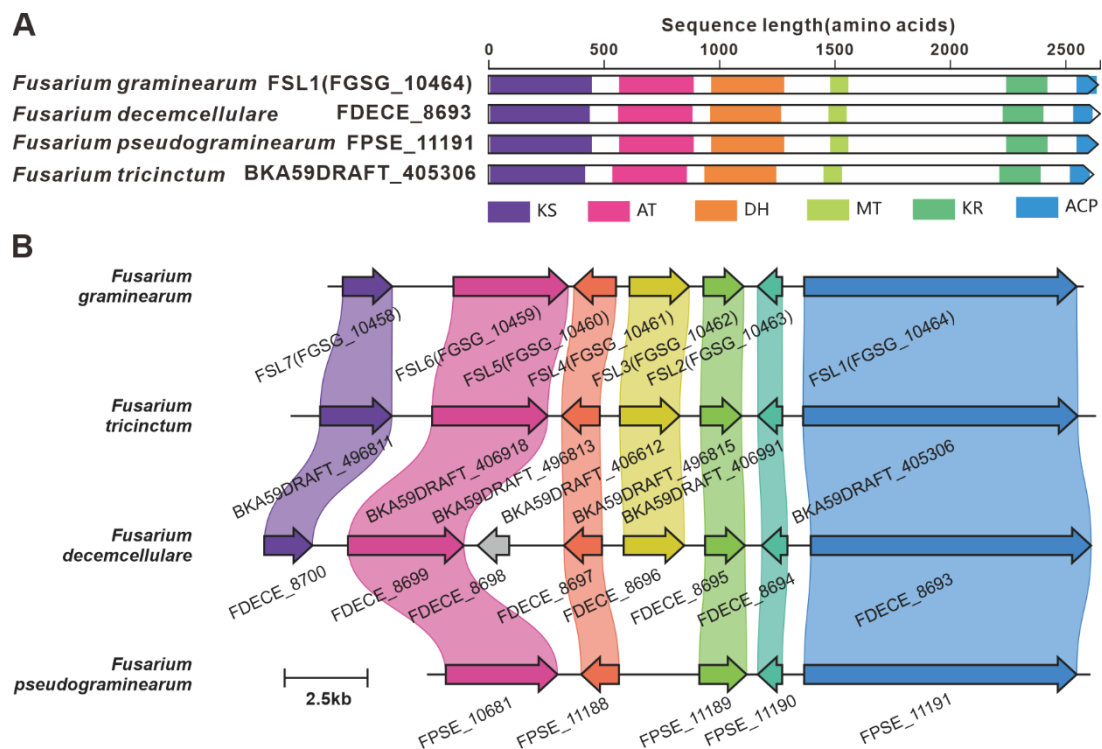

Figure S41: Domain comparison of FSL1 and its homologues (A), comparison of FSLBGCs from different *Fusarium* species (B).

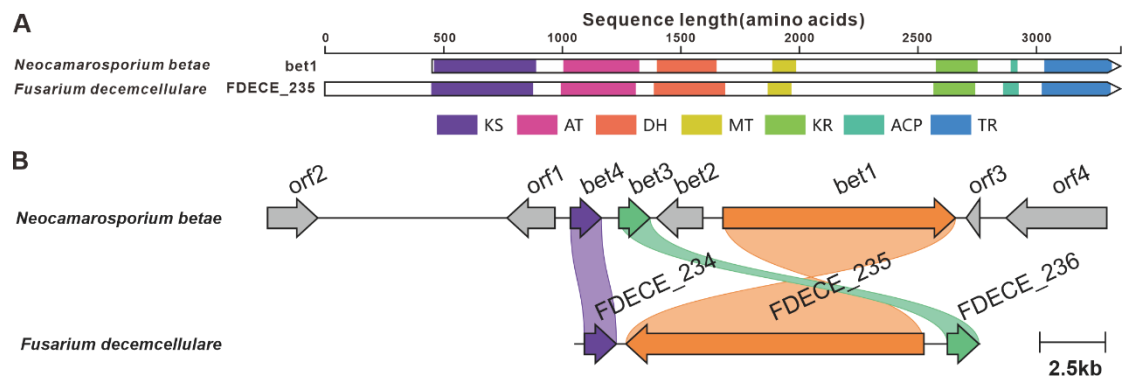

Figure S42: Domain comparison of Bet1 and its homologues (A), comparison of *bet*BGCs from different species (B).

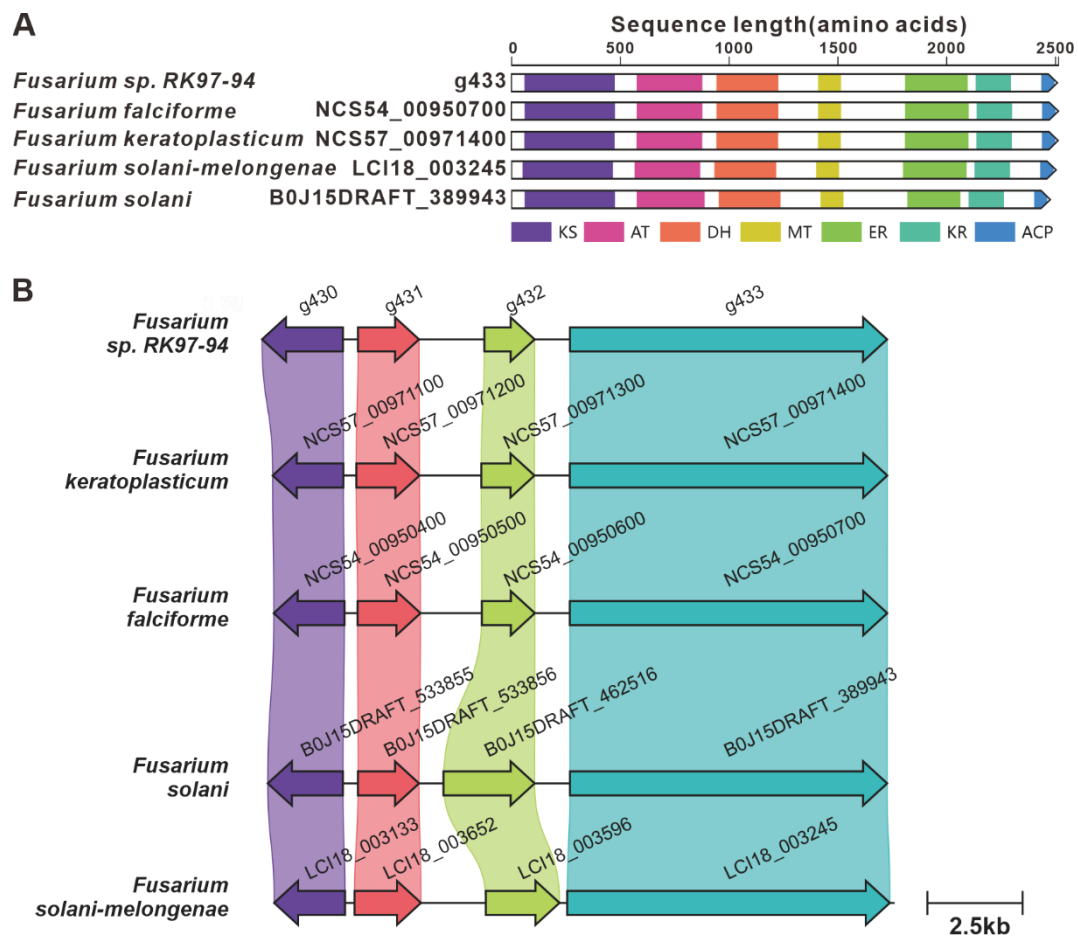

Figure S43: Domain comparison of G433 and its homologues (A), comparison of the BGC for G433 and its similar BGCs (B).

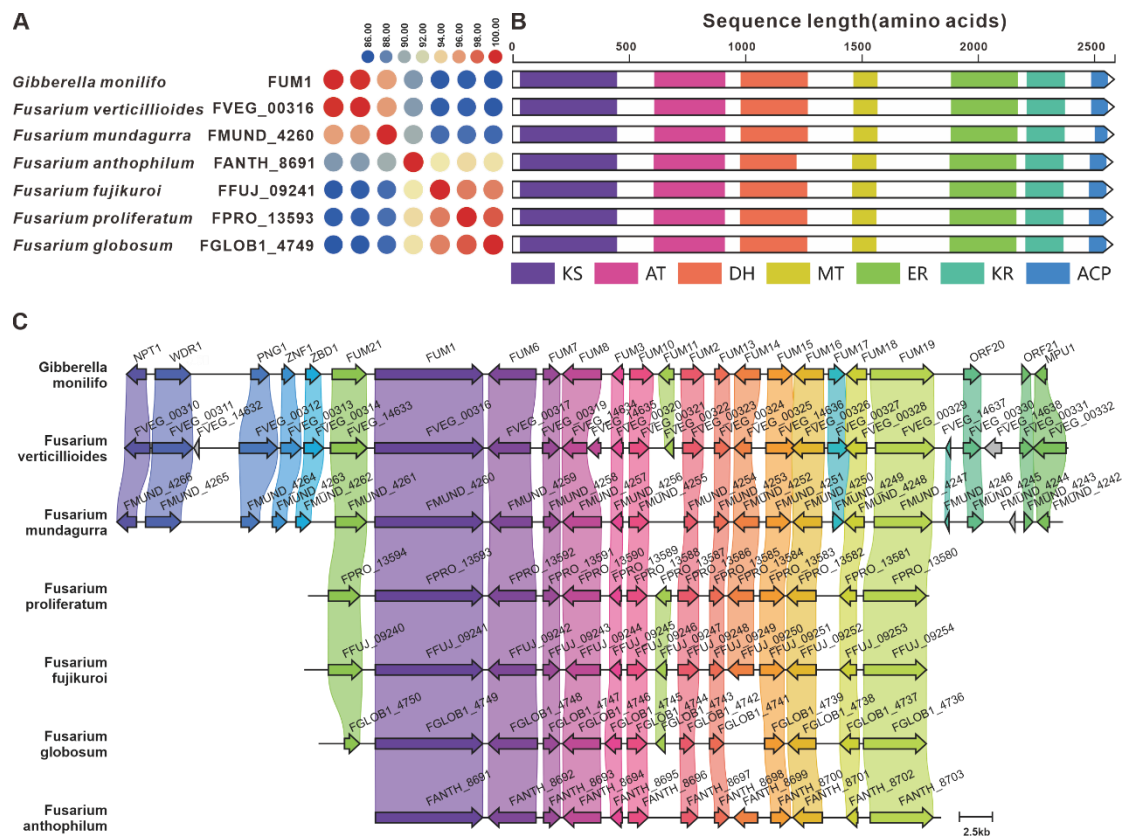

Figure S44: Comparison of the amino acid sequence identity of Alt5 and its homologues (A), domain comparison of FUM1 and its homologues (B), comparison of *FUMBGCs* from different *Fusarium* species (C).

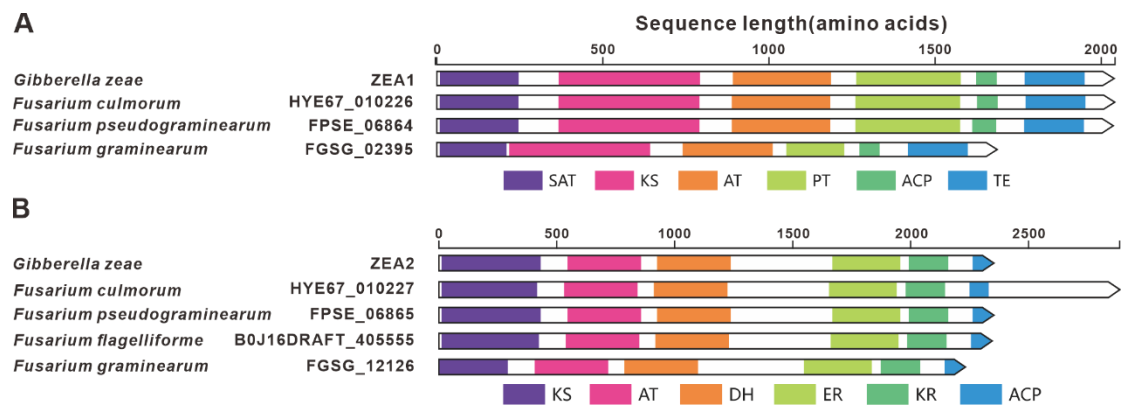

Figure S45: Domain comparison of ZEA1 and its homologues (A), domain comparison of ZEA2 and its homologues (B).



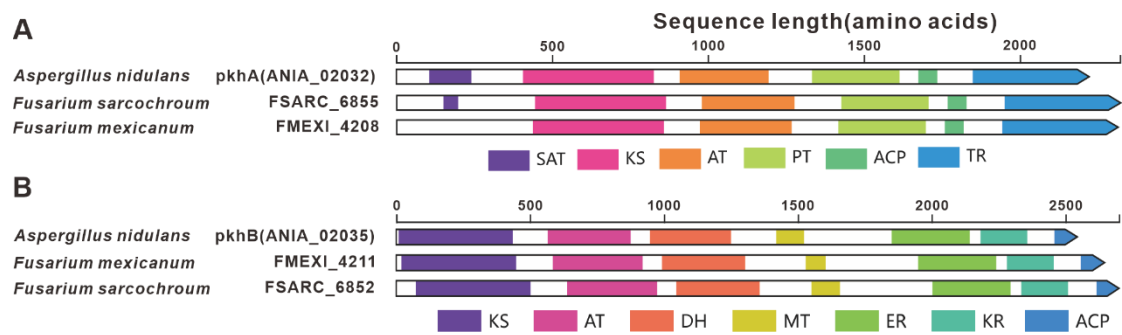

Figure S46: Domain comparison of PkhA and its homologues (A), domain comparison of PkhB and its homologues (B).

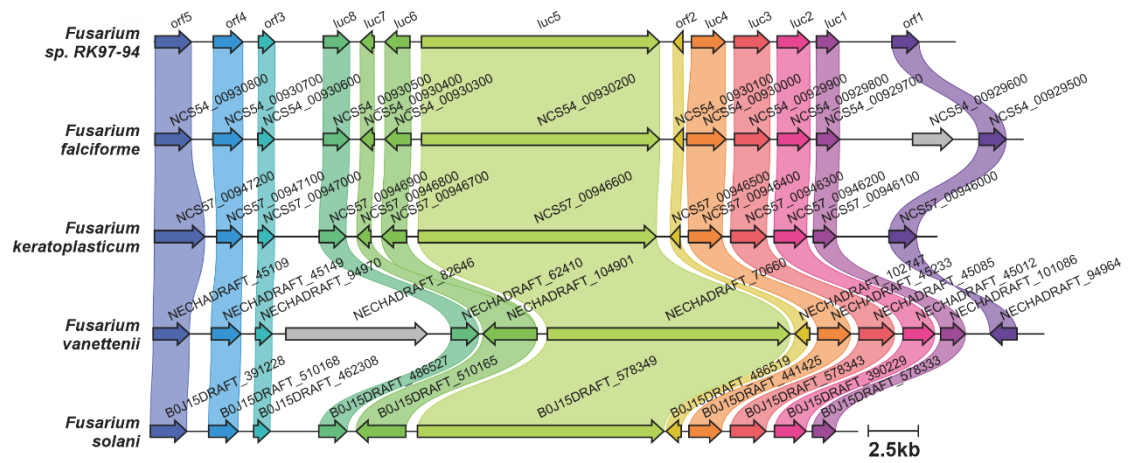

Figure S47: Comparison of *luc*BGCs from different *Fusarium* species.

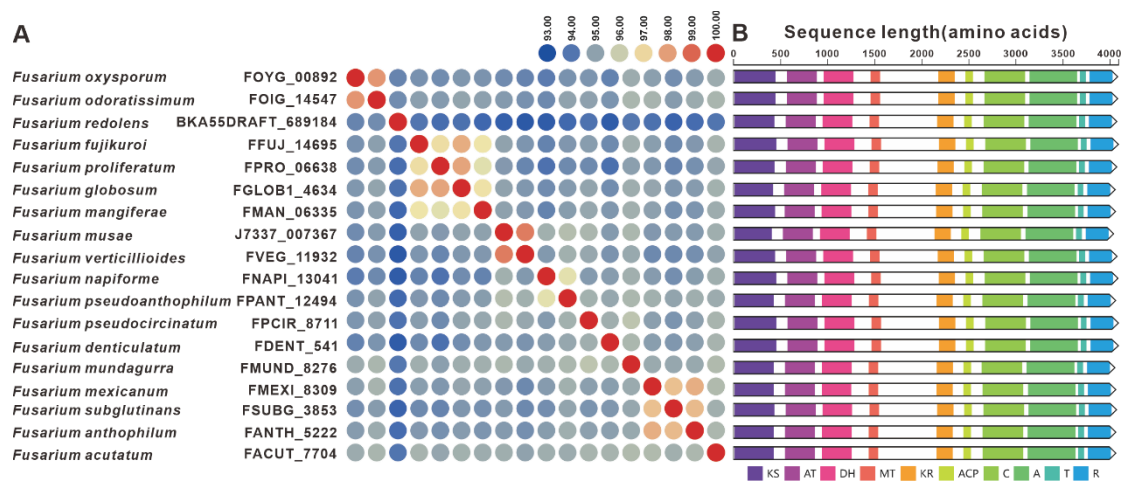

Figure S48: Amino acid **sequence** identity comparison (A) and domain comparison (B) of newly discovered PKS-NRPSs in 35 pathogenic *Fusarium* species.

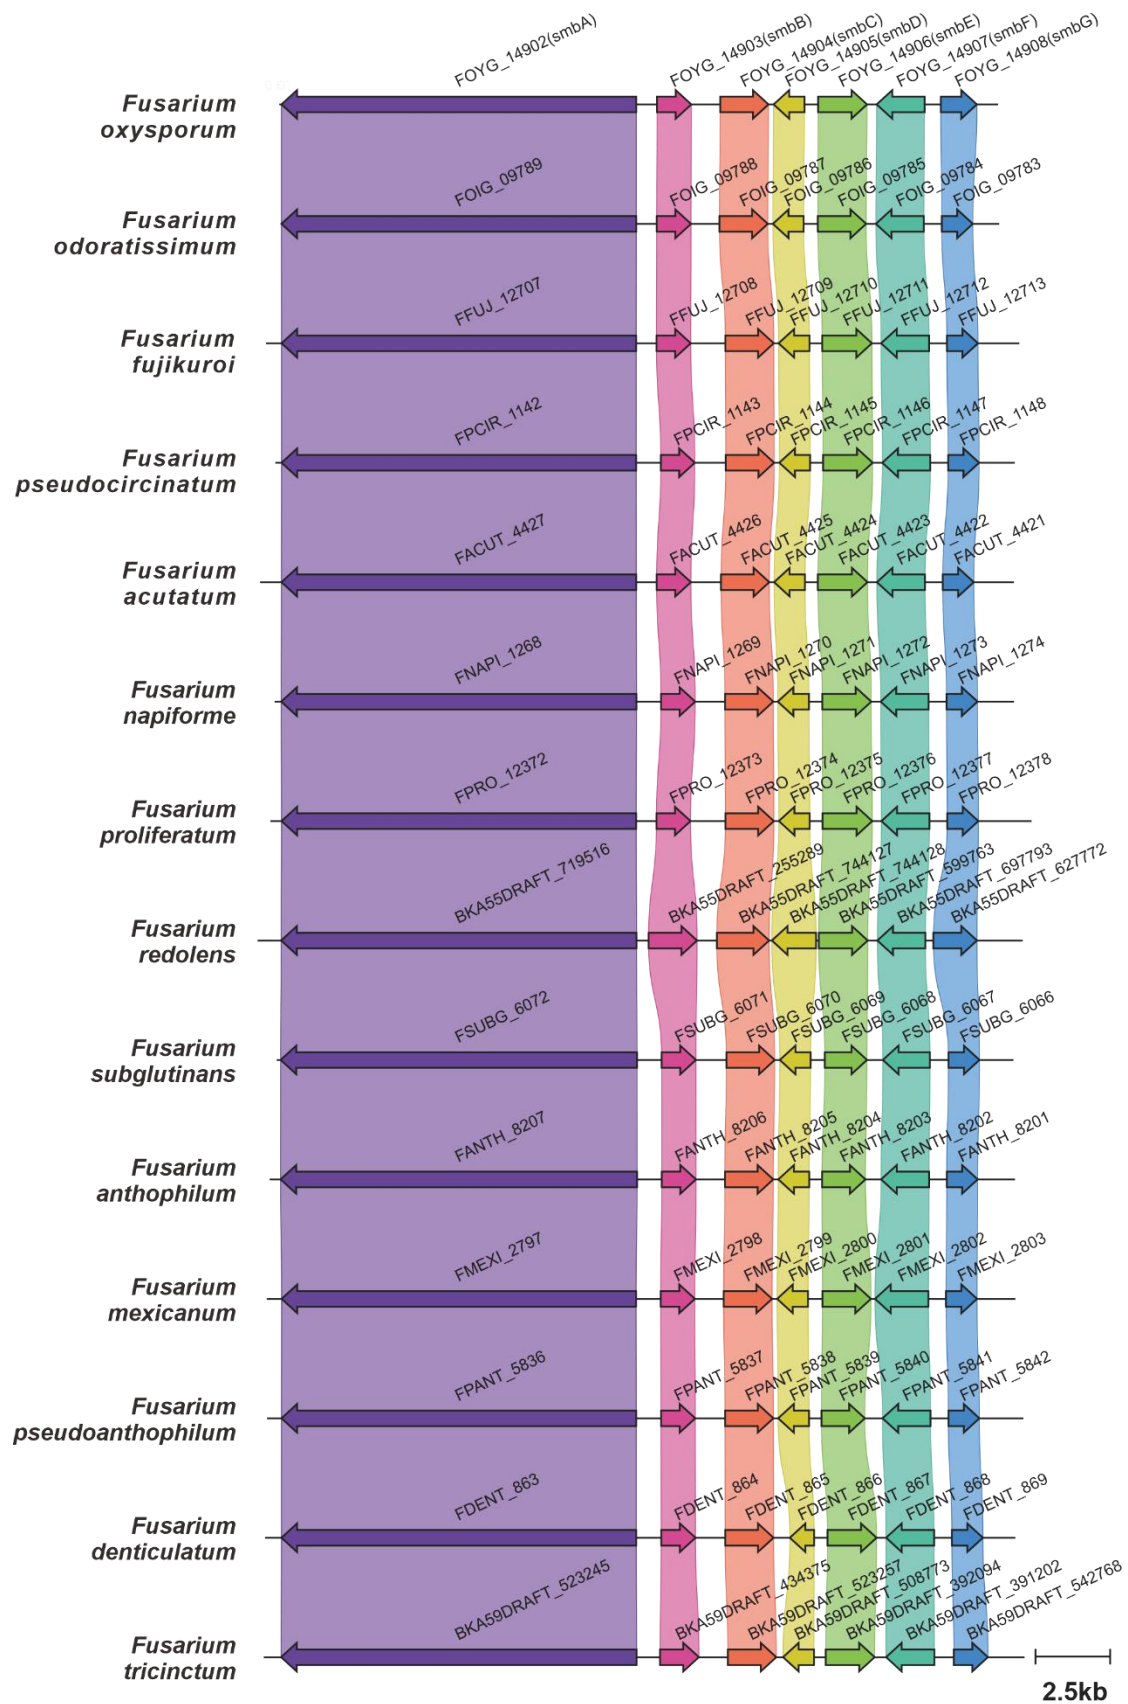

Figure S49: Comparison of *smb*BGCs from different *Fusarium* species.

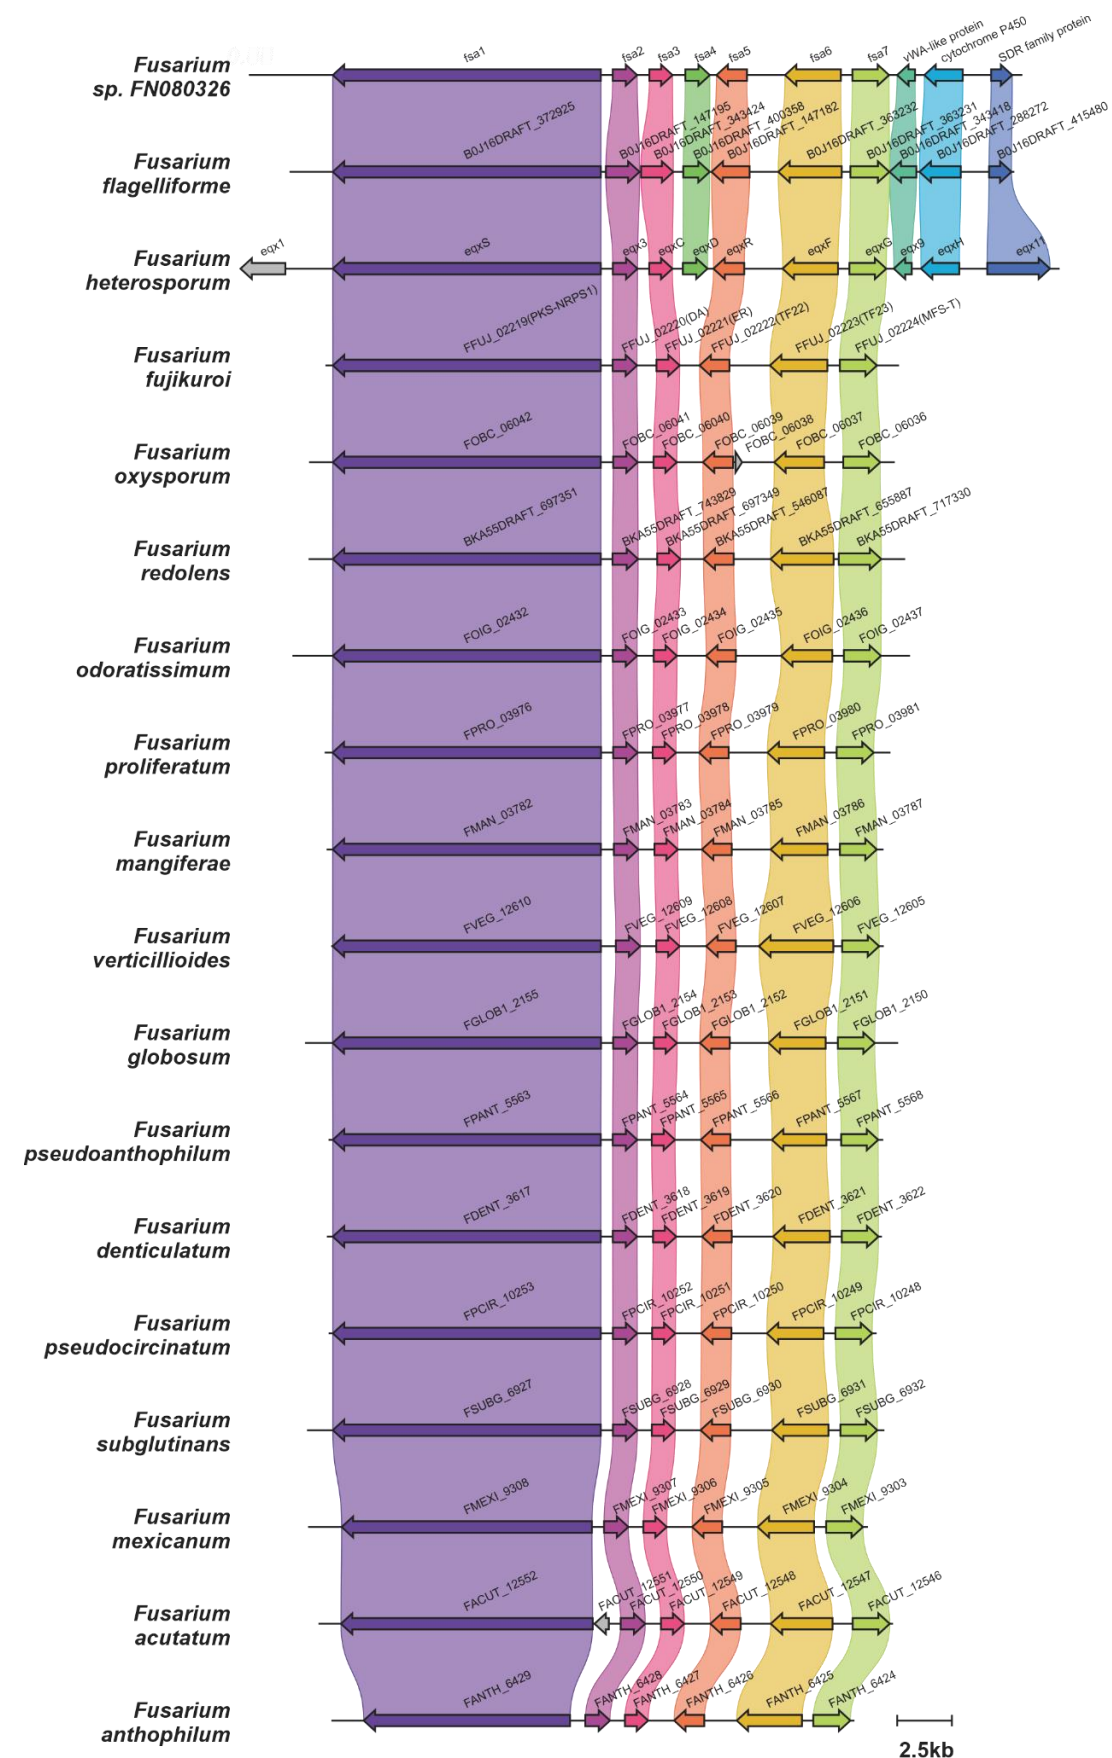

Figure S50: Comparison of *fsa*BGCs and *PKS-NRPS*BGCs from different *Fusarium* species.

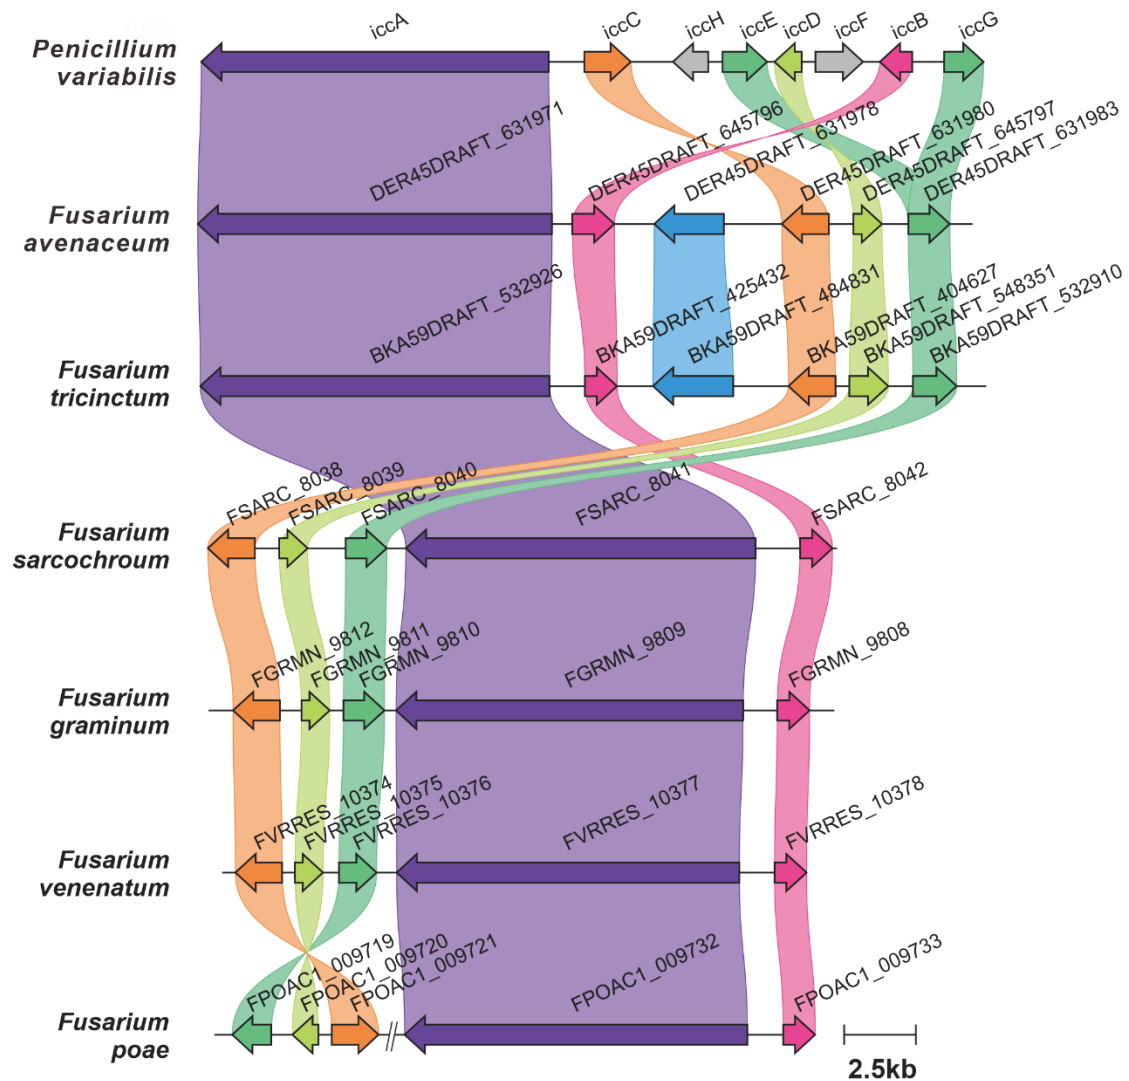

Figure S51: Comparison of *icc*BGCs from different *Fusarium* species.



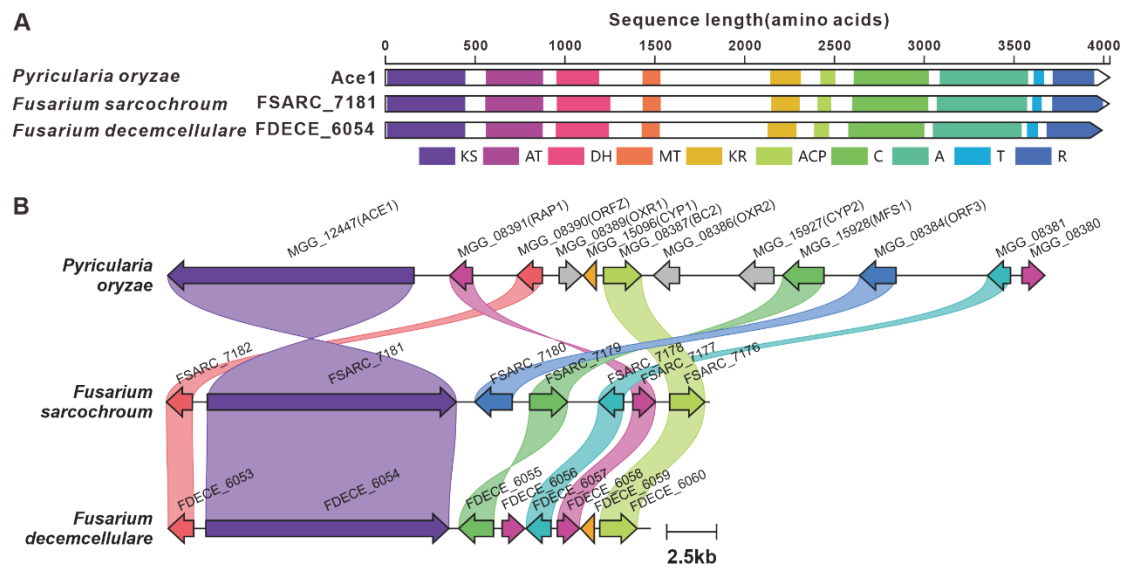

Figure S53: Domain comparison of ACE1 and its homologues (A), comparison of ACEBGCs from different species (B).



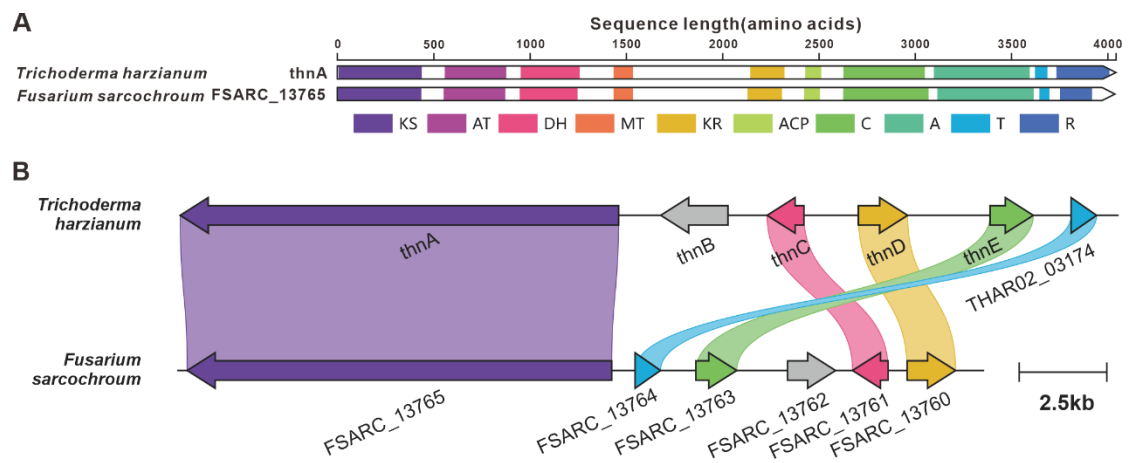

Figure S54: Domain comparison of ThnA and its homologues (A), comparison of *thn*BGCs from different species (B).

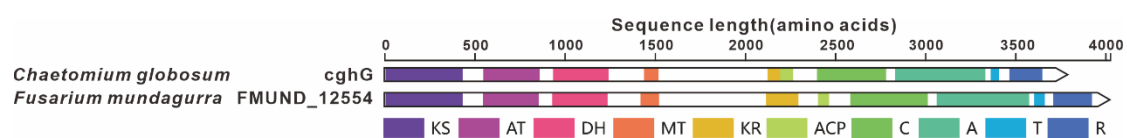

Figure S55: Domain comparison of CghG and its homologues.

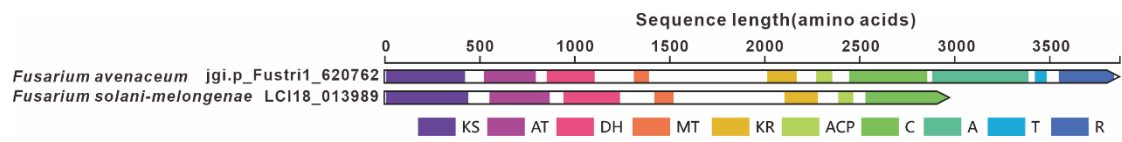

Figure S56: Domain comparison of LCI18\_013989 and jgi.p\_Fustri\_620762.

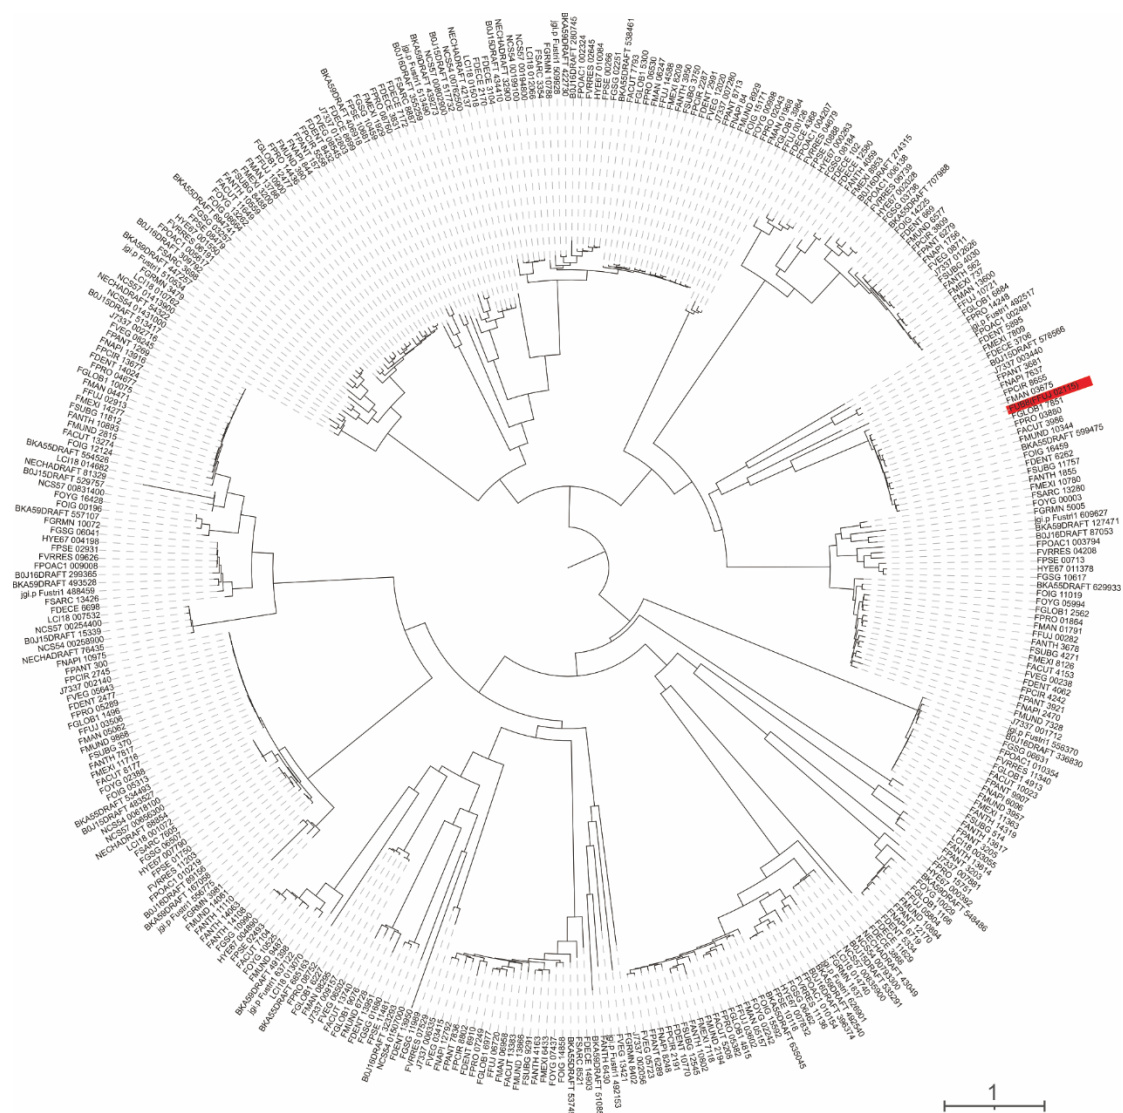

Figure S57: Cluster analysis of NRPS-like sequences based on phylogenetic tree. Sequence with a red background indicate that the sequence has been characterised.

## References.

1. Michielse, C.B. and M. Rep, *Pathogen profile update: Fusarium oxysporum*. MOL PLANT PATHOL, 2009. **10**(3): p. 311-324.
2. Matic, S., M.L. Gullino, and D. Spadaro, *The puzzle of bakanae disease through interactions between Fusarium fujikuroi and rice*. FRONT BIOSCI, 2017. **9**(2): p. 333-344.
3. Xie, S.Y., et al., *Whole-Genome Sequencing and Comparative Genome Analysis of Fusarium solani-melongenae Causing Fusarium Root and Stem Rot in Sweetpotatoes*. MICROBIOL SPECTR, 2022. **10**(4): p. e00683-22.
4. Debbarma, R., et al., *First report of root rot disease on Solanum lycopersicum L. caused by Fusarium vanettenii in India*. J PHYTOPATHOL, 2021. **169**(11-12): p. 752-756.
5. van Westerhoven, A.C., et al., *Dissemination of Fusarium wilt of banana in Mozambique caused by Fusarium odoratissimum Tropical Race 4*. PLANT DIS, 2023. **107**(ja): p. 628-632.
6. Farias, O.R., et al., *Occurrence of Fusarium proliferatum Causing Vascular Wilt on Cowpea (Vigna unguiculata) in Brazil*. PLANT DIS, 2022. **106**: p. 1992.
7. Drakopoulos, D., et al., *Control of Fusarium graminearum in Wheat With Mustard-Based Botanicals: From in vitro to in planta*. FRONT MICROBIOL, 2020. **11**: p. 1595.
8. Xie, Y., et al., *A Megabirnavirus Alleviates the Pathogenicity of Fusarium pseudograminearum to Wheat*. PHYTOPATHOLOGY, 2022. **112**(5): p. 1175-1184.
9. Atanasoff-Kardjalieff, A.K., et al., *Biosynthesis of Fusapyrone Depends on the H3K9 Methyltransferase, FmKmt1, in Fusarium mangiferae*. FRONT FUNGAL BIOL, 2021. **2**.
10. Scherm, B., et al., *Fusarium culmorum: causal agent of foot and root rot and head blight on wheat*. MOL PLANT PATHOL, 2013. **14**(4): p. 323-341.
11. Wang, R.-Y., et al., *First Report of Fusarium solani Causing Fusarium Root Rot and Stem Canker on Storage Roots of Sweet Potato in China*. PLANT DIS, 2014. **98**(1): p. 160-160.
12. Fan, S., et al., *American Ginseng Root Rot Caused by Fusarium redolens in China*. PLANT DIS, 2021. **105**: p. 2734.
13. Xu, X., et al., *Fusarium Species Associated with Maize Leaf Blight in Heilongjiang Province, China*. J FUNGI, 2022. **8**(11): p. 1170.
14. Degradi, L., et al., *Exploring Mitogenomes Diversity of Fusarium musae from Banana Fruits and Human Patients*. MICROORGANISMS, 2022. **10**(6): p. 1115.
15. Wang, C.G., et al., *First Report of Fusarium falciforme Causing Leaf Blight in Acacia mangium in China*. PLANT DIS, 2022. **0**(0): p. PDIS-07-22-1583-PDN.
16. Rigorth, K.S., M.R. Finckh, and A. Šišić, *First Report of Fusarium venenatum Causing Foot and Root Rot of Wheat (Triticum aestivum) in Germany*. PLANT DIS, 2021. **105**(6): p. 1855.
17. Wang, Y., R. Wang, and Y. Sha, *Distribution, pathogenicity and disease control of Fusarium tricinctum*. FRONT MICROBIOL, 2022. **13**: p. 939927.
18. Ghimire, B., et al., *First Report of Fusarium poae Causing Fusarium Head Blight of Wheat in Georgia, U.S.A*. PLANT DIS, 2021. **105**(2): p. 491-491.
19. Chiewchanvit, S., et al., *Melanization of Fusarium keratoplasticum (F. solani Species Complex) During Disseminated Fusariosis in a Patient with Acute Leukemia*. MYCOPATHOLOGIA, 2017. **182**(9-10): p. 879-885.
20. Chen, Y., H.C. Kistler, and Z. Ma, *Fusarium graminearum Trichothecene Mycotoxins: Biosynthesis, Regulation, and Management*. ANNU REV PHYTOPATHOL, 2019. **57**: p. 15-39.
21. de Souza, M., et al., *Fusarium napiforme systemic infection: case report with molecular characterization and antifungal susceptibility tests*. SPRINGERPLUS, 2014. **3**: p. 492.
22. Santillán-Mendoza, R., et al., *Genetic diversity of Fusarium mexicanum, causal agent of mango and big-leaf mahogany malformation in Mexico*. MOL BIOL REP, 2019. **46**(4): p. 3887-3897.
23. Serrato-Díaz, L.M., et al., *First Report of Fusarium decemcellulare Causing Inflorescence Wilt*

- and Vascular and Flower Necrosis of Rambutan (*Nephelium lappaceum*), Longan (*Dimocarpus longan*), and Mango (*Mangifera indica*). PLANT DIS, 2015. **99**(8): p. 1187.
24. Gopalakrishnan, S., et al., Chickpea wilt: identification and toxicity of 8-O-methyl-fusarubin from *Fusarium acutatum*. PHYTOCHEMISTRY, 2005. **66**(13): p. 1536-1539.
  25. Ferrigo, D., et al., Influence of H<sub>2</sub>O<sub>2</sub>-Induced Oxidative Stress on In Vitro Growth and Moniliformin and Fumonisin Accumulation by *Fusarium proliferatum* and *Fusarium subglutinans*. TOXINS, 2021. **13**(9): p. 653.
  26. Blacutt, A.A., et al., *Fusarium verticillioides*: Advancements in Understanding the Toxicity, Virulence, and Niche Adaptations of a Model Mycotoxigenic Pathogen of Maize. PHYTOPATHOLOGY, 2018. **108**(3): p. 312-326.
  27. Mesny, F., et al., Genetic determinants of endophytism in the Arabidopsis root mycobiome. NAT COMMUN, 2021. **12**(1): p. 7227.
  28. Gagkaeva, T.Y., O.P. Gavrilova, and A.S. Orina, First Report of *Fusarium globosum* Associated with Barley Grain in the Southwestern Part of Siberia. PLANT DIS, 2019. **103**(3): p. 588-588.
  29. Ono, L.T., et al., Fungal communities in Brazilian cassava tubers and food products. INT J FOOD MICROBIOL, 2023. **384**: p. 109909.
  30. Freeman, S., et al., First Report of Mango Malformation Disease Caused by *Fusarium pseudocircinatum* in Mexico. PLANT DIS, 2014. **98**(11): p. 1583.
  31. González, M.S., et al., First Report of *Fusarium denticulatum* from Sweet Potato in Venezuela. PLANT DIS, 2003. **87**(2): p. 202.
  32. Amobonye, A., et al., Characterisation, pathogenicity and hydrolytic enzyme profiling of selected *Fusarium* species and their inhibition by novel coumarins. ARCH MICROBIOL, 2021. **203**(6): p. 3495-3508.
  33. Nicolli, C.P., et al., *Fusarium fujikuroi* species complex in Brazilian rice: Unveiling increased phylogenetic diversity and toxigenic potential. INT J FOOD MICROBIOL, 2020. **330**: p. 108667.
  34. Sandoval-Denis, M., et al., Symptomatic Citrus trees reveal a new pathogenic lineage in *Fusarium* and two new *Neocosmospora* species. PERSOONIA, 2018. **40**: p. 1-25.
  35. Nelson, P.E., Taxonomy and biology of *Fusarium moniliforme*. MYCOPATHOLOGIA, 1992. **117**(1-2): p. 29-36.
  36. Studt, L., et al., Biosynthesis of fusarubins accounts for pigmentation of *Fusarium fujikuroi* perithecia. APPL ENVIRON MICROBIOL, 2012. **78**(12): p. 4468-4480.
  37. Son, S.W., et al., Bikaverin and fusaric acid from *Fusarium oxysporum* show antioomycete activity against *Phytophthora infestans*. J Appl Microbiol, 2008. **104**(3): p. 692-698.
  38. von Barga, K.W., et al., Isolation and Structure Elucidation of Fujikurins A-D: Products of the PKS19 Gene Cluster in *Fusarium fujikuroi*. J NAT PROD, 2015. **78**(8): p. 1809-1815.
  39. Miyamoto, Y., et al., ACTTS3 Encoding a Polyketide Synthase Is Essential for the Biosynthesis of ACT-Toxin and Pathogenicity in the Tangerine Pathotype of *Alternaria alternata*. MOL PLANT MICROBE IN, 2010. **23**(4): p. 406-414.
  40. Wight, W.D., et al., Biosynthesis and Role in Virulence of the Histone Deacetylase Inhibitor Depudecin from *Alternaria brassicicola*. Molecular Plant-Microbe Interactions®, 2009. **22**(10): p. 1258-1267.
  41. Li, H., et al., Chemical Ecogenomics-Guided Discovery of Phytotoxic alpha-Pyrone from the Fungal Wheat Pathogen *Parastagonospora nodorum*. ORG LETT, 2018. **20**(19): p. 6148-6152.
  42. Fujii, I., et al., An iterative type I polyketide synthase PKSN catalyzes synthesis of the decaketide alternapyrone with regio-specific octa-methylation. CHEM BIOL, 2005. **12**(12): p. 1301-1309.
  43. Bonsch, B., et al., Identification of genes encoding squalenstatin S1 biosynthesis and in vitro production of new squalenstatin analogues. CHEM COMMUN, 2016. **52**(41): p. 6777-6780.
  44. Brock, N.L., et al., Genetic dissection of sesquiterpene biosynthesis by *Fusarium fujikuroi*.

- CHEMBIOCHEM, 2013. **14**(3): p. 311-315.
45. Hwang, I.S. and I.P. Ahn, *Multi-Homologous Recombination-Based Gene Manipulation in the Rice Pathogen Fusarium fujikuroi*. Plant Pathol J, 2016. **32**(3): p. 173-181.
  46. Kimura, M., et al., *The trichothecene biosynthesis gene cluster of Fusarium graminearum F15 contains a limited number of essential pathway genes and expressed non-essential genes*. FEBS LETT, 2003. **539**(1-3): p. 105-110.
  47. Lee, T., et al., *Tri13 and Tri7 determine deoxynivalenol- and nivalenol-producing chemotypes of Gibberella zeae*. APPL ENVIRON MICROBIOL, 2002. **68**(5): p. 2148-2154.
  48. Tokai, T., et al., *Screening of putative oxygenase genes in the Fusarium graminearum genome sequence database for their role in trichothecene biosynthesis*. FEMS Microbiol Lett, 2005. **251**(2): p. 193-201.
  49. Wollenberg, R.D., et al., *Chrysogine Biosynthesis Is Mediated by a Two-Module Nonribosomal Peptide Synthetase*. J NAT PROD, 2017. **80**(7): p. 2131-2135.
  50. Romans-Fuertes, P., et al., *Identification of the non-ribosomal peptide synthetase responsible for biosynthesis of the potential anti-cancer drug sansalvamide in Fusarium solani*. CURR GENET, 2016. **62**(4): p. 799-807.
  51. Slightom, J.L., et al., *Cloning and molecular characterization of the gene encoding the Aureobasidin A biosynthesis complex in Aureobasidium pullulans BP-1938*. GENE, 2009. **431**(1-2): p. 67-79.
  52. Yoshimi, A., et al., *Heterologous Production of a Novel Cyclic Peptide Compound, KK-1, in Aspergillus oryzae*. Front Microbiol, 2018. **9**: p. 690.
  53. Jin, J.M., et al., *Functional characterization and manipulation of the apicidin biosynthetic pathway in Fusarium semitectum*. MOL MICROBIOL, 2010. **76**(2): p. 456-466.
  54. Droce, A., et al., *Functional Analysis of the Fusarielin Biosynthetic Gene Cluster*. MOLECULES, 2016. **21**(12): p. 1701.
  55. Kim, Y.T., et al., *Two different polyketide synthase genes are required for synthesis of zearalenone in Gibberella zeae*. MOL MICROBIOL, 2005. **58**(4): p. 1102-1113.
  56. Yin, W.B., et al., *A nonribosomal peptide synthetase-derived iron(III) complex from the pathogenic fungus Aspergillus fumigatus*. J Am Chem Soc, 2013. **135**(6): p. 2064-2067.
  57. Kakule, T.B., et al., *Two related pyrrolidinedione synthetase loci in Fusarium heterosporum ATCC 74349 produce divergent metabolites*. ACS Chem Biol, 2013. **8**(7): p. 1549-1557.
